# Supplementary material for: Solvent- and additive-free oxidative amidation of aldehydes using a recyclable oxoammonium salt
Source: Royal Society of Chemistry journal article supplement (doi:10.1039/d2ob00307d), 2022-01-01
Supplement: d2ob00307d1.pdf [file d2ob00307d1.pdf]

# Solvent- and Additive-free Oxidative Amidation of Aldehydes Using a Recyclable Oxoammonium Salt

Arturo León Sandoval, Katrina E. Doherty, Geoffrey P. Wadey, and Nicholas E. Leadbeater\*

Department of Chemistry, University of Connecticut, 55 North Eagleville Road, Storrs, Connecticut 06269, USA.

\*E-mail: nicholas.leadbeater@uconn.edu

## SUPPORTING INFORMATION

|                                                                                                                              |           |
|------------------------------------------------------------------------------------------------------------------------------|-----------|
| <b>General Considerations</b> .....                                                                                          | <b>3</b>  |
| <b>Chemicals</b> .....                                                                                                       | <b>3</b>  |
| <b>Procedure for the Oxidation of Aldehydes to Acyl Pyrazoles</b> .....                                                      | <b>3</b>  |
| <b>Procedure for Scale-Up of the Reaction</b> .....                                                                          | <b>3</b>  |
| <b>Procedure for the Recovery of Spent Nitroxide</b> .....                                                                   | <b>4</b>  |
| <b>Product Characterization</b> .....                                                                                        | <b>5</b>  |
| <b>References</b> .....                                                                                                      | <b>9</b>  |
| <b><sup>1</sup>H-, <sup>13</sup>C-, and <sup>19</sup>F-NMR Spectra of Synthesized Compounds</b> .....                        | <b>10</b> |
| <sup>1</sup> H-NMR (300 MHz CDCl <sub>3</sub> ) (1 <i>H</i> -Pyrazol-1-yl)( <i>p</i> -tolyl)methanone (7a) .....             | 10        |
| <sup>1</sup> H-NMR (400 MHz CDCl <sub>3</sub> ) (4-Fluorophenyl)(1 <i>H</i> -pyrazol-1-yl)methanone (7b) .....               | 11        |
| <sup>1</sup> H-NMR (400 MHz CDCl <sub>3</sub> ) (4-( <i>tert</i> -Butyl)phenyl)(1 <i>H</i> -pyrazol-1-yl)methanone (7c)..... | 12        |
| <sup>1</sup> H-NMR (400 MHz CDCl <sub>3</sub> ) Phenyl(1 <i>H</i> -pyrazol-1-yl)methanone (7d).....                          | 13        |
| <sup>1</sup> H-NMR (400 MHz CDCl <sub>3</sub> ) (4-Methoxyphenyl)(1 <i>H</i> -pyrazol-1-yl)methanone (7e).....               | 14        |
| <sup>1</sup> H-NMR (400 MHz CDCl <sub>3</sub> ) (1 <i>H</i> -Pyrazol-1-yl)(4-(trifluoromethyl)phenyl)methanone (7f).....     | 15        |
| <sup>1</sup> H-NMR (400 MHz CDCl <sub>3</sub> ) 4-(1 <i>H</i> -Pyrazole-1-carbonyl)benzotrile (7g) .....                     | 16        |
| <sup>1</sup> H-NMR (400 MHz CDCl <sub>3</sub> ) (4-Nitrophenyl)(1 <i>H</i> -pyrazol-1-yl)methanone (7h).....                 | 17        |
| <sup>1</sup> H-NMR (400 MHz CDCl <sub>3</sub> ) Methyl 4-(1 <i>H</i> -pyrazole-1-carbonyl)benzoate (7i) .....                | 18        |
| <sup>1</sup> H-NMR (400 MHz CDCl <sub>3</sub> ) (1 <i>H</i> -Pyrazol-1-yl)( <i>m</i> -tolyl)methanone (7j) .....             | 19        |
| <sup>1</sup> H-NMR (400 MHz CDCl <sub>3</sub> ) (3-Nitrophenyl)(1 <i>H</i> -pyrazol-1-yl)methanone (7k).....                 | 20        |
| <sup>1</sup> H-NMR (400 MHz CDCl <sub>3</sub> ) (3-Methoxyphenyl)(1 <i>H</i> -pyrazol-1-yl)methanone (7l).....               | 21        |
| <sup>1</sup> H-NMR (400 MHz CDCl <sub>3</sub> ) (2-Fluorophenyl)(1 <i>H</i> -pyrazol-1-yl)methanone (7m) .....               | 22        |
| <sup>1</sup> H-NMR (300 MHz CDCl <sub>3</sub> ) (2-Nitrophenyl)(1 <i>H</i> -pyrazol-1-yl)methanone (7n).....                 | 23        |
| <sup>1</sup> H-NMR (400 MHz CDCl <sub>3</sub> ) (1 <i>H</i> -Pyrazol-1-yl)( <i>o</i> -tolyl)methanone (7o) .....             | 24        |
| <sup>1</sup> H-NMR (400 MHz CDCl <sub>3</sub> ) (2-Methoxyphenyl)(1 <i>H</i> -pyrazol-1-yl)methanone (7p).....               | 25        |
| <sup>1</sup> H-NMR (400 MHz CDCl <sub>3</sub> ) (2-Bromo-4-fluorophenyl)(1 <i>H</i> -pyrazol-1-yl)methanone (7q) .....       | 26        |
| <sup>1</sup> H-NMR (400 MHz CDCl <sub>3</sub> ) Naphtalen-1-yl(1 <i>H</i> -pyrazol-1-yl)methanone (7r) .....                 | 27        |
| <sup>1</sup> H-NMR (300 MHz CDCl <sub>3</sub> ) (2-Chloropyridin-3-yl)(1 <i>H</i> -pyrazol-1-yl)methanone (7s).....          | 28        |
| <sup>1</sup> H-NMR (300 MHz CDCl <sub>3</sub> ) (2-Chloroquinolin-3-yl)(1 <i>H</i> -pyrazol-1-yl)methanone (7t).....         | 29        |
| <sup>1</sup> H-NMR (400 MHz CDCl <sub>3</sub> ) (5-bromothiophen-2-yl)(1 <i>H</i> -pyrazol-1-yl)methanone (7u).....          | 30        |
| <sup>1</sup> H-NMR (400 MHz CDCl <sub>3</sub> ) (5-bromofuran-2-yl)(1 <i>H</i> -pyrazol-1-yl)methanone (7v).....             | 31        |

|                                                                                                                                |    |
|--------------------------------------------------------------------------------------------------------------------------------|----|
| <sup>1</sup> H-NMR (400 MHz CDCl <sub>3</sub> ) Cyclohexyl(1 <i>H</i> -pyrazol-1-yl)methanone (7w).....                        | 32 |
| <sup>1</sup> H-NMR (400 MHz CDCl <sub>3</sub> ) 3-phenyl-1-(1 <i>H</i> -pyrazol-1-yl)prop-2-yn-1-one (7z).....                 | 33 |
| <sup>1</sup> H-NMR (300 MHz CDCl <sub>3</sub> ) <i>p</i> -Tolyl(2 <i>H</i> -1,2,3-triazol-2-yl)methanone (7ae) .....           | 34 |
| <sup>1</sup> H-NMR (300 MHz CDCl <sub>3</sub> ) 3-(1 <i>H</i> -pyrazol-1-yl)isobenzofuran-1(3 <i>H</i> )-one (7ai) .....       | 35 |
| <sup>1</sup> H-NMR (400 MHz CDCl <sub>3</sub> ) 1,4-phenylenebis((1 <i>H</i> -pyrazol-1-yl)methanone) (7aj).....               | 36 |
| <sup>13</sup> C-NMR (75 MHz CDCl <sub>3</sub> ) (1 <i>H</i> -Pyrazol-1-yl)( <i>p</i> -tolyl)methanone (7a) .....               | 37 |
| <sup>13</sup> C-NMR (101 MHz CDCl <sub>3</sub> ) (4-Fluorophenyl)(1 <i>H</i> -pyrazol-1-yl)methanone (7b).....                 | 38 |
| <sup>13</sup> C-NMR (101 MHz CDCl <sub>3</sub> ) (4-( <i>tert</i> -Butyl)phenyl)(1 <i>H</i> -pyrazol-1-yl)methanone (7c) ..... | 39 |
| <sup>13</sup> C-NMR (101 MHz CDCl <sub>3</sub> ) Phenyl(1 <i>H</i> -pyrazol-1-yl)methanone (7d) .....                          | 40 |
| <sup>13</sup> C-NMR (101 MHz CDCl <sub>3</sub> ) (4-Methoxyphenyl)(1 <i>H</i> -pyrazol-1-yl)methanone (7e) .....               | 41 |
| <sup>13</sup> C-NMR (101 MHz CDCl <sub>3</sub> ) (1 <i>H</i> -Pyrazol-1-yl)(4-(trifluoromethyl)phenyl)methanone (7f) .....     | 42 |
| <sup>13</sup> C-NMR (101 MHz CDCl <sub>3</sub> ) 4-(1 <i>H</i> -Pyrazole-1-carbonyl)benzotrile (7g) .....                      | 43 |
| <sup>13</sup> C-NMR (101 MHz CDCl <sub>3</sub> ) (4-Nitrophenyl)(1 <i>H</i> -pyrazol-1-yl)methanone (7h) .....                 | 44 |
| <sup>13</sup> C-NMR (101 MHz CDCl <sub>3</sub> ) Methyl 4-(1 <i>H</i> -pyrazole-1-carbonyl)benzoate (7i).....                  | 45 |
| <sup>13</sup> C-NMR (101 MHz CDCl <sub>3</sub> ) (1 <i>H</i> -Pyrazol-1-yl)( <i>m</i> -tolyl)methanone (7j) .....              | 46 |
| <sup>13</sup> C-NMR (101 MHz CDCl <sub>3</sub> ) (3-Nitrophenyl)(1 <i>H</i> -pyrazol-1-yl)methanone (7k).....                  | 47 |
| <sup>13</sup> C-NMR (101 MHz CDCl <sub>3</sub> ) (3-Methoxyphenyl)(1 <i>H</i> -pyrazol-1-yl)methanone (7l).....                | 48 |
| <sup>13</sup> C-NMR (101 MHz CDCl <sub>3</sub> ) (2-Fluorophenyl)(1 <i>H</i> -pyrazol-1-yl)methanone (7m) .....                | 49 |
| <sup>13</sup> C-NMR (75 MHz CDCl <sub>3</sub> ) (2-Nitrophenyl)(1 <i>H</i> -pyrazol-1-yl)methanone (7n) .....                  | 50 |
| <sup>13</sup> C-NMR (101 MHz CDCl <sub>3</sub> ) (1 <i>H</i> -Pyrazol-1-yl)( <i>o</i> -tolyl)methanone (7o) .....              | 51 |
| <sup>13</sup> C-NMR (101 MHz CDCl <sub>3</sub> ) (2-Methoxyphenyl)(1 <i>H</i> -pyrazol-1-yl)methanone (7p) .....               | 52 |
| <sup>13</sup> C-NMR (101 MHz CDCl <sub>3</sub> ) (2-Bromo-4-fluorophenyl)(1 <i>H</i> -pyrazol-1-yl)methanone (7q).....         | 53 |
| <sup>13</sup> C-NMR (101 MHz CDCl <sub>3</sub> ) Naphtalen-1-yl(1 <i>H</i> -pyrazol-1-yl)methanone (7r).....                   | 54 |
| <sup>13</sup> C-NMR (101 MHz CDCl <sub>3</sub> ) (2-Chloropyridin-3-yl)(1 <i>H</i> -pyrazol-1-yl)methanone (7s).....           | 55 |
| <sup>13</sup> C-NMR (101 MHz CDCl <sub>3</sub> ) (2-Chloroquinolin-3-yl)(1 <i>H</i> -pyrazol-1-yl)methanone (7t) .....         | 56 |
| <sup>13</sup> C-NMR (101 MHz CDCl <sub>3</sub> ) (5-bromothiophen-2-yl)(1 <i>H</i> -pyrazol-1-yl)methanone (7u).....           | 57 |
| <sup>13</sup> C-NMR (101 MHz CDCl <sub>3</sub> ) (5-bromofuran-2-yl)(1 <i>H</i> -pyrazol-1-yl)methanone (7v) .....             | 58 |
| <sup>13</sup> C-NMR (101 MHz CDCl <sub>3</sub> ) Cyclohexyl(1 <i>H</i> -pyrazol-1-yl)methanone (7w) .....                      | 59 |
| <sup>13</sup> C-NMR (101 MHz CDCl <sub>3</sub> ) 3-phenyl-1-(1 <i>H</i> -pyrazol-1-yl)prop-2-yn-1-one (7z) .....               | 60 |
| <sup>13</sup> C-NMR (101 MHz CDCl <sub>3</sub> ) <i>p</i> -Tolyl(2 <i>H</i> -1,2,3-triazol-2-yl)methanone (7ae) .....          | 61 |
| <sup>13</sup> C-NMR (101 MHz CDCl <sub>3</sub> ) 3-(1 <i>H</i> -pyrazol-1-yl)isobenzofuran-1(3 <i>H</i> )-one (7ai) .....      | 62 |
| <sup>13</sup> C-NMR (101 MHz CDCl <sub>3</sub> ) 1,4-phenylenebis((1 <i>H</i> -pyrazol-1-yl)methanone) (7aj).....              | 63 |
| <sup>19</sup> F-NMR (376 MHz CDCl <sub>3</sub> ) (4-Fluorophenyl)(1 <i>H</i> -pyrazol-1-yl)methanone (7b) .....                | 64 |
| <sup>19</sup> F-NMR (376 MHz CDCl <sub>3</sub> ) (1 <i>H</i> -Pyrazol-1-yl)(4-(trifluoromethyl)phenyl)methanone (7f) .....     | 65 |
| <sup>19</sup> F-NMR (376 MHz CDCl <sub>3</sub> ) (2-Fluorophenyl)(1 <i>H</i> -pyrazol-1-yl)methanone (7m) .....                | 66 |
| <sup>19</sup> F-NMR (376 MHz CDCl <sub>3</sub> ) (2-Bromo-4-fluorophenyl)(1 <i>H</i> -pyrazol-1-yl)methanone (7q) .....        | 67 |

**Gas Chromatograms..... 68**

|                                                  |    |
|--------------------------------------------------|----|
| Octanal + Pyrazole (7x).....                     | 68 |
| Undecanal + Pyrazole (7y).....                   | 69 |
| Cinnamaldehyde + Pyrazole (7aa).....             | 69 |
| α-bromocinnamaldehyde + Pyrazole (7ab).....      | 69 |
| 4-tolualdehyde + 4-chloropyrazole (7ac).....     | 69 |
| 4-tolualdehyde + 3,5-dimethylpyrazole (7ad)..... | 69 |
| Tolualdehyde + Benzimidazole (7af).....          | 69 |

## General Considerations

NMR spectra ( $^1\text{H}$ -,  $^{13}\text{C}$ -, and  $^{19}\text{F}$ -) were performed at 300 K using either a 300 MHz, or 400 MHz spectrometer.  $^1\text{H}$ -NMR spectra were referenced to residual  $\text{CHCl}_3$  (7.26 ppm) in  $\text{CDCl}_3$ .  $^{13}\text{C}$ -NMR spectra were referenced to  $\text{CDCl}_3$  (77.16 ppm).  $^{19}\text{F}$ -NMR spectra were referenced to hexafluorobenzene (-161.64 ppm).<sup>1</sup> Reactions were monitored by a gas chromatograph attached to a mass spectrometer and / or thin-layer chromatography. High-resolution mass spectra were collected on an Applied Biosystems QSTAR Elite instrument equipped with an electrospray ionization (ESI) source, calibrated using Agilent LC/MS tuning mix. Reactions were monitored by an Agilent Technologies 7820A Gas Chromatograph attached to a 5975 Mass Spectrometer, and/or by TLC on silica gel plates (60 Å porosity, 250  $\mu\text{m}$  thickness). TLC analysis was performed using UV light.

## Chemicals

Deuterated chloroform ( $\text{CDCl}_3$ ) was purchased from Cambridge Isotope Laboratories. 4-Acetamido-TEMPO (ACT, **2**) was prepared using a previously reported protocol.<sup>2</sup> All the starting materials used were purchased from Oakwood Chemicals, Sigma-Aldrich, or Alfa Aesar and distilled before use if required.

## Procedure for the Oxidation of Aldehydes to Acyl Pyrazoles

To a 4-dram reaction vial equipped with a stir bar were added the aldehyde (1 mmol, 1 eq), pyrazole (75 mg, 1.1 eq), and 4-acetamido-2,2,6,6-tetramethylpiperidin-1-oxoammonium nitrate, **6** (206 mg, 0.75 eq). The vial was closed tightly and the contents heated at 54 °C for 1 h. Upon completion of the heating step, the reaction mixture was quenched with methanol (1 mL) and the vial contents transferred to a glass separatory funnel, rinsing the reaction vial with diethyl ether (50 mL). Deionized water (10 mL) was added to the separatory funnel and the organic layer washed and separated. The aqueous layer\*\* was then washed with three aliquots of diethyl ether (3  $\times$  30 mL). The organic washes were then combined, placed into a separatory funnel, and washed with 2 M hydrochloric acid (15 mL) followed by saturated aqueous sodium bicarbonate (20 mL). The organic layer was dried over sodium sulfate, and the solvent removed *in vacuo* to afford the product.

## Procedure for Scale-Up of the Reaction

To a 50-mL round-bottom flask, equipped with a stir bar were added **4a** (1.201 g, 10 mmol, 1 eq), pyrazole (0.749 g, 1.1 eq) and 4-acetamido-2,2,6,6-tetramethylpiperidin-1-oxoammonium nitrate, **6** (2.06 g, 0.75 eq). The contents of the flask were heated at 54 °C for 1 h. Upon completion of the heating step, the reaction mixture was quenched with methanol (2 mL) and the vial contents transferred to a glass separatory funnel, rinsing the flask with diethyl ether (50 mL). Deionized water (50 mL) was added to the separatory funnel and the organic layer washed and separated. The aqueous layer was then washed with three aliquots of diethyl ether (3  $\times$  50 mL). The organic washes were then combined, placed into a separatory funnel, and washed with 2 M hydrochloric acid (30 mL) followed by saturated aqueous sodium bicarbonate (40 mL). The organic layer was dried over sodium sulfate, and the solvent removed *in vacuo* to afford the product.

### **Procedure for the recovery of the spent nitroxide**

After performing the workup of an oxidation reaction, the aqueous layer (indicated in the above procedure as \*\*) was taken aside and the water removed by evaporation to leave an orange-brown solid. The solid was dissolved in ethyl acetate (15 mL), the resultant solution transferred to a separatory funnel and this washed with saturated aqueous sodium bicarbonate (3 mL). The organic layer was dried over sodium sulfate, and the solvent removed *in vacuo* to afford 4-Acetamido-TEMPO, **2**.

## Product characterization

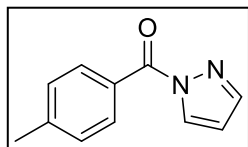

**(1H-Pyrazol-1-yl)(p-tolyl)methanone (7a).** Obtained as a white solid (0.153 g, 82%).  $^1\text{H NMR}$  (300 MHz, Chloroform-d)  $\delta$  8.43 (dd,  $J = 2.9, 0.7$  Hz, 1H), 8.09 – 8.00 (m, 2H), 7.79 (dd,  $J = 1.5, 0.7$  Hz, 1H), 7.35 – 7.26 (m, 2H), 6.51 (dd,  $J = 2.9, 1.5$  Hz, 1H), 2.43 (s, 3H).  $^{13}\text{C NMR}$  (75 MHz, Chloroform-d)  $\delta$  166.31, 144.33, 143.98, 131.70, 130.44, 128.88, 128.64, 109.28, 21.74. Spectral data for this compound is consistent with that previously reported.<sup>3</sup>

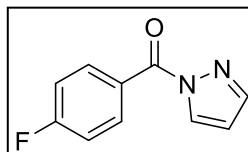

**(4-Fluorophenyl)(1H-pyrazol-1-yl)methanone (7b).** Obtained as a white solid (0.137 g, 72%).  $^1\text{H NMR}$  (400 MHz, Chloroform-d)  $\delta$  8.44 (d,  $J = 2.9$  Hz, 1H), 8.29 – 8.19 (m, 2H), 7.80 (d,  $J = 1.5$  Hz, 1H), 7.24 – 7.13 (m, 2H), 6.53 (dd,  $J = 2.9, 1.5$  Hz, 1H).  $^{13}\text{C NMR}$  (101 MHz, Chloroform-d)  $\delta$  165.80 (d,  $J = 255.4$  Hz), 165.15, 144.67, 134.60 (d,  $J = 9.4$  Hz), 130.64, 127.67 (d,  $J = 3.1$  Hz), 115.48 (d,  $J = 21.9$  Hz), 109.61.  $^{19}\text{F NMR}$  (376 MHz, Chloroform-d)  $\delta$  -104.61 (tt,  $J = 8.2, 5.4$  Hz). Spectral data for this compound is consistent with that previously reported.<sup>4</sup>

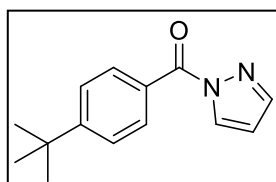

**(4-(tert-Butyl)phenyl)(1H-pyrazol-1-yl)methanone (7c).** Obtained as a white solid (0.199 g, 87%).  $^1\text{H NMR}$  (400 MHz, Chloroform-d)  $\delta$  8.47 (dd,  $J = 2.9, 0.7$  Hz, 1H), 8.16 – 8.07 (m, 2H), 7.83 (dd,  $J = 1.5, 0.7$  Hz, 1H), 7.61 – 7.52 (m, 2H), 6.54 (dd,  $J = 2.9, 1.5$  Hz, 1H), 1.39 (s, 9H).  $^{13}\text{C NMR}$  (101 MHz, Chloroform-d)  $\delta$  166.34, 156.89, 144.41, 131.58, 130.48, 128.64, 125.27, 109.31, 35.23, 31.14. Spectral data for this compound is consistent with that previously reported.<sup>5</sup>

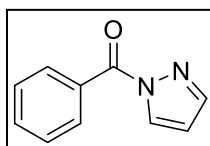

**Phenyl(1H-pyrazol-1-yl)methanone (7d).** Obtained as a clear oil (0.112 g, 65%) was prepared according to general procedure from benzaldehyde **with the following modifications** 1) 1.2 equiv of pyrazole was used 2) reaction was run for 20 minutes.  $^1\text{H NMR}$  (400 MHz, Chloroform-d)  $\delta$  8.44 (d,  $J = 2.8$  Hz, 1H), 8.17 – 8.09 (m, 2H), 7.81 (d,  $J = 1.5$  Hz, 1H), 7.66 – 7.57 (m, 1H), 7.51 (dd,  $J = 8.4, 7.1$  Hz, 2H), 6.52 (dd,  $J = 2.9, 1.5$  Hz, 1H).  $^{13}\text{C NMR}$  (101 MHz, Chloroform-d)  $\delta$  166.45, 144.55, 133.05, 131.54, 130.47, 128.15, 109.49. Spectral data for this compound is consistent with that previously reported.<sup>6</sup>

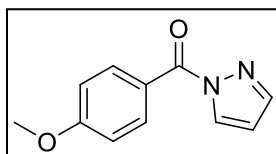

**(4-Methoxyphenyl)(1H-pyrazol-1-yl)methanone (7e).** Obtained as a white solid (0.158 g, 78%).  $^1\text{H NMR}$  (400 MHz, Chloroform-d)  $\delta$  8.43 (dd,  $J = 2.8, 0.7$  Hz, 1H), 8.26 – 8.18 (m, 2H), 7.82 – 7.77 (m, 1H), 7.04 – 6.95 (m, 2H), 6.50 (dd,  $J = 2.8, 1.5$  Hz, 1H), 3.89 (s, 3H).  $^{13}\text{C NMR}$  (101 MHz, Chloroform-d)  $\delta$  165.43, 163.64, 144.11, 134.22, 130.55, 123.52, 113.55, 108.99, 55.52. Spectral data for this compound is consistent with that previously reported.<sup>3</sup>

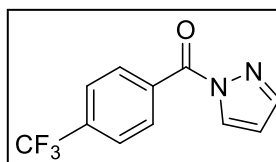

**(1H-Pyrazol-1-yl)(4-(trifluoromethyl)phenyl)methanone (7f).** Obtained as a colorless oil (0.175 g, 73%).  $^1\text{H NMR}$  (400 MHz, Chloroform-d)  $\delta$  8.45 (d,  $J = 2.9$  Hz, 1H), 8.23 (d,  $J = 8.1$  Hz, 2H), 7.81 (d,  $J = 1.5$  Hz, 1H), 7.76 (d,  $J = 8.2$  Hz, 2H), 6.55 (dd,  $J = 2.9, 1.5$  Hz, 1H).  $^{13}\text{C NMR}$  (101 MHz, Chloroform-d)  $\delta$  165.31, 145.03, 134.90, 134.28 (q,  $J = 32.7$  Hz), 131.84, 130.40, 125.09 (q,  $J = 3.7$  Hz), 123.61 (q,  $J = 272.8$  Hz), 110.05.  $^{19}\text{F NMR}$  (376 MHz, Chloroform-d)  $\delta$  -63.08. Spectral data for this compound is consistent with that previously reported.<sup>3</sup>

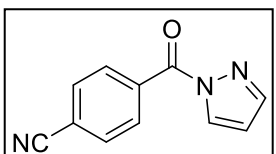

**4-(1H-Pyrazole-1-carbonyl)benzonitrile (7g).** Obtained as a white solid (0.144 g, 73%)  $^1\text{H NMR}$  (400 MHz, Chloroform-d)  $\delta$  8.46 (dd,  $J = 2.9, 0.7$  Hz, 1H), 8.27 – 8.20 (m, 2H), 7.84 – 7.76 (m, 3H), 6.58 (dd,  $J = 2.9, 1.5$  Hz, 1H).  $^{13}\text{C NMR}$  (101 MHz, Chloroform-d)  $\delta$  164.83, 145.19, 135.45, 131.95, 131.78, 130.40, 117.87, 116.28, 110.26. Spectral data for this compound is consistent with that previously reported.<sup>3</sup>

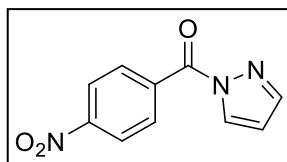

**(4-Nitrophenyl)(1H-pyrazol-1-yl)methanone (7h).** Obtained as an off white solid (0.178 g, 82%).  $^1\text{H NMR}$  (400 MHz, Chloroform-d)  $\delta$  8.47 (d,  $J = 2.9$  Hz, 1H), 8.39 – 8.32 (m, 2H), 8.30 (d,  $J = 9.0$  Hz, 2H), 7.83 (d,  $J = 1.5$  Hz, 1H), 6.59 (dd,  $J = 2.9, 1.5$  Hz, 1H).  $^{13}\text{C NMR}$  (101 MHz, Chloroform-d)  $\delta$  164.65, 150.10, 145.33, 132.55, 130.42, 123.12, 110.41. Spectral data for this compound is consistent with that previously reported.<sup>4</sup>

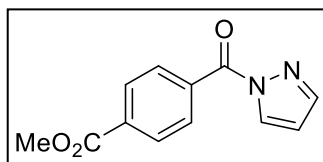

**Methyl 4-(1H-pyrazole-1-carbonyl)benzoate (7i).** Obtained as a yellow solid (0.180 g, 78%).  $^1\text{H NMR}$  (400 MHz, Chloroform-d)  $\delta$  8.45 (dd,  $J = 2.9, 0.8$  Hz, 1H), 8.16 (s, 4H), 7.84 – 7.79 (m, 1H), 6.55 (dd,  $J = 3.0, 1.5$  Hz, 1H), 3.96 (s, 3H).  $^{13}\text{C NMR}$  (101 MHz, Chloroform-d)  $\delta$  166.27, 165.86, 144.99, 135.50, 133.84, 131.46, 130.47, 129.28, 110.00, 52.61. Spectral data for this compound is consistent with that previously reported.<sup>3</sup>

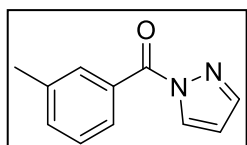

**(1H-Pyrazol-1-yl)(m-tolyl)methanone (7j).** Obtained as a colorless oil (0.130 g, 70%).  $^1\text{H NMR}$  (400 MHz, Chloroform-d)  $\delta$  8.43 (dd,  $J = 2.8, 0.7$  Hz, 1H), 7.96 – 7.87 (m, 2H), 7.80 (d,  $J = 1.4$  Hz, 1H), 7.46 – 7.32 (m, 2H), 6.52 (dd,  $J = 2.8, 1.5$  Hz, 1H), 2.44 (s, 3H).  $^{13}\text{C NMR}$  (101 MHz, Chloroform-d)  $\delta$  166.67, 144.46, 137.97, 133.83, 131.83, 131.52, 130.45, 128.67, 128.02, 109.40, 21.38. Spectral data for this compound is consistent with that previously reported.<sup>5</sup>

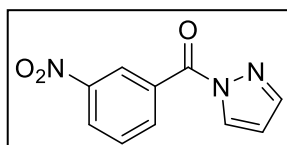

**(3-Nitrophenyl)(1H-pyrazol-1-yl)methanone (7k).** Obtained as a white solid (0.159 g, 73%).  $^1\text{H NMR}$  (400 MHz, Chloroform-d)  $\delta$  8.45 (d,  $J = 2.8$  Hz, 1H), 8.25 (dd,  $J = 8.2, 1.2$  Hz, 1H), 7.81 (td,  $J = 7.5, 1.2$  Hz, 1H), 7.77 – 7.66 (m, 2H), 7.63 (d,  $J = 1.5$  Hz, 1H), 6.53 (dd,  $J = 2.9, 1.5$  Hz, 1H).  $^{13}\text{C NMR}$  (101 MHz, Chloroform-d)  $\delta$  165.24, 147.14, 145.25, 134.06, 131.53, 129.94, 129.58, 128.97, 124.14, 110.50. Spectral data for this compound is consistent with that previously reported.<sup>5</sup>

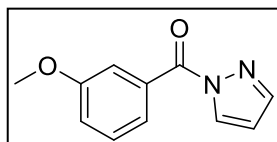

**(3-Methoxyphenyl)(1H-pyrazol-1-yl)methanone (7l).** Obtained as a yellow oil (0.168 g, 83%) was prepared according to general procedure from benzaldehyde **with the following modification** reaction was run for 20 minutes.  $^1\text{H NMR}$  (400 MHz, Chloroform-d)  $\delta$  8.43 (d,  $J = 2.8$  Hz, 1H), 7.81 (d,  $J = 1.5$  Hz, 1H), 7.72 (dt,  $J = 7.7, 1.2$  Hz, 1H), 7.65 (dd,  $J = 2.7, 1.5$  Hz, 1H), 7.42 (t,  $J = 8.0$  Hz, 1H), 7.16 (ddd,  $J = 8.3, 2.6, 0.9$  Hz, 1H), 6.53 (dd,  $J = 2.9, 1.4$  Hz, 1H), 3.87 (s, 3H).  $^{13}\text{C NMR}$  (101 MHz, Chloroform-d)  $\delta$  159.24, 144.56, 132.68, 130.55, 129.18, 124.00, 119.37, 116.23, 109.49, 55.51. **HRMS:** (ESI)  $m/z$  calculated for  $\text{C}_{11}\text{H}_{11}\text{N}_2\text{O}_2^+$   $[M+H]^+$  203.0815, found 203.0858.

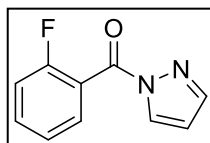

**(2-Fluorophenyl)(1H-pyrazol-1-yl)methanone (7m).** Obtained as a white solid (0.141 g, 74%).  $^1\text{H NMR}$  (400 MHz, Chloroform-d)  $\delta$  8.37 (d,  $J = 2.9$  Hz, 1H), 7.75 (d,  $J = 1.5$  Hz, 1H), 7.65 (ddd,  $J = 8.1, 6.7, 1.8$  Hz, 1H), 7.60 – 7.49 (m, 1H), 7.30 – 7.22 (m, 1H), 7.18 (ddd,  $J = 9.6, 8.4, 1.0$  Hz, 1H), 6.51 (dd,  $J = 2.9, 1.4$  Hz, 1H).  $^{13}\text{C NMR}$  (101 MHz, Chloroform-d)  $\delta$  164.19, 160.17 (d,  $J = 254.5$  Hz), 145.01, 133.78 (d,  $J = 8.6$  Hz), 131.00, 129.44, 123.97, 121.51 (d,  $J = 14.7$  Hz), 116.29 (d,  $J = 21.3$  Hz), 110.24.  $^{19}\text{F NMR}$  (376 MHz, Chloroform-d)  $\delta$  -110.62 (dt,  $J = 9.9, 5.9$  Hz). Spectral data for this compound is consistent with that previously reported.<sup>5</sup>

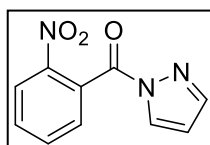

**(2-Nitrophenyl)(1H-pyrazol-1-yl)methanone (7n).** Obtained as an off yellow powder (0.176 g, 81%).  $^1\text{H NMR}$  (300 MHz, Chloroform-d)  $\delta$  8.45 (d,  $J = 2.9$  Hz, 1H), 8.25 (dd,  $J = 8.1, 1.3$  Hz, 1H), 7.89 – 7.60 (m, 4H), 6.53 (dd,  $J = 2.9, 1.5$  Hz, 1H).  $^{13}\text{C NMR}$  (75 MHz, Chloroform-d)  $\delta$  165.26, 145.27, 134.08, 131.54, 129.92, 129.57, 128.97, 124.14, 110.52. Spectral data for this compound is consistent with that previously reported.<sup>3</sup>

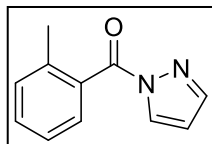

**(1H-Pyrazol-1-yl)(o-tolyl)methanone (7o).** Obtained as a yellow oil (0.149 g, 80%). <sup>1</sup>H NMR (400 MHz, Chloroform-d) δ 8.38 (dd, J = 2.8, 0.6 Hz, 1H), 7.76 (d, J = 1.4 Hz, 1H), 7.51 (dd, J = 8.2, 1.3 Hz, 1H), 7.44 (td, J = 7.5, 1.4 Hz, 1H), 7.34 – 7.27 (m, 2H), 6.52 (dt, J = 2.3, 1.1 Hz, 1H), 2.36 (s, 3H). <sup>13</sup>C NMR (101 MHz, Chloroform-d) δ 168.16, 144.96, 137.37, 132.64, 131.30, 130.87, 129.72, 129.23, 125.35, 109.95, 19.86. HRMS: (ESI) m/z calculated for C<sub>11</sub>H<sub>11</sub>N<sub>2</sub>O<sup>+</sup> [M+H]<sup>+</sup> 187.0866, found 187.0868.

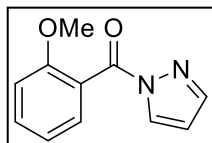

**(2-Methoxyphenyl)(1H-pyrazol-1-yl)methanone (7p).** Obtained as a yellow solid (0.168 g, 83%) was prepared according to general procedure from benzaldehyde *with the following modification* reaction was run for 20 minutes. <sup>1</sup>H NMR (400 MHz, Chloroform-d) δ 8.33 (dd, J = 2.9, 0.7 Hz, 1H), 7.74 – 7.69 (m, 1H), 7.55 – 7.43 (m, 2H), 7.10 – 6.98 (m, 2H), 6.48 (dd, J = 2.9, 1.4 Hz, 1H), 3.79 (s, 3H). <sup>13</sup>C NMR (101 MHz, Chloroform-d) δ 166.54, 157.53, 144.57, 132.80, 129.87, 129.47, 122.87, 120.31, 111.69, 109.66, 55.93. HRMS: (ESI) m/z calculated for C<sub>11</sub>H<sub>11</sub>N<sub>2</sub>O<sub>2</sub><sup>+</sup> [M+H]<sup>+</sup> 203.0815, found 203.0842.

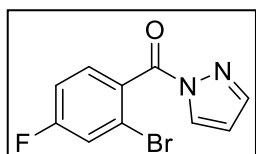

**(2-Bromo-4-fluorophenyl)(1H-pyrazol-1-yl)methanone (7q).** Obtained as a white solid (0.175 g, 65%). <sup>1</sup>H NMR (400 MHz, Chloroform-d) δ 8.39 (dd, J = 3.0, 0.7 Hz, 1H), 7.76 (d, J = 1.4 Hz, 1H), 7.52 (dd, J = 8.6, 5.7 Hz, 1H), 7.42 (dd, J = 8.2, 2.5 Hz, 1H), 7.16 (ddd, J = 8.6, 7.9, 2.4 Hz, 1H), 6.55 (dd, J = 2.9, 1.5 Hz, 1H). <sup>13</sup>C NMR (101 MHz, Chloroform-d) δ 165.64, 163.56 (d, J = 256.0 Hz), 145.40, 131.61 (d, J = 9.3 Hz), 129.51, 121.62 (d, J = 9.6 Hz), 120.87 (d, J = 24.7 Hz), 114.66 (d, J = 21.8 Hz), 110.70. <sup>19</sup>F NMR (376 MHz, Chloroform-d) δ -106.34 (td, J = 8.1, 5.6 Hz). Spectral data for this compound is consistent with that previously reported.<sup>3</sup>

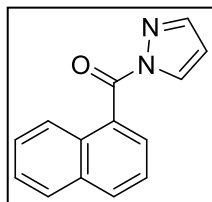

**Naphtalen-1-yl(1H-pyrazol-1-yl)methanone (7r).** Obtained as a yellow solid (0.156 g, 70%). <sup>1</sup>H NMR (400 MHz, Chloroform-d) δ 8.48 (d, J = 2.8 Hz, 1H), 8.05 (dt, J = 8.3, 1.1 Hz, 1H), 8.05 – 7.96 (m, 1H), 7.96 – 7.88 (m, 1H), 7.82 (dd, J = 7.1, 1.2 Hz, 1H), 7.76 (d, J = 1.4 Hz, 1H), 7.63 – 7.52 (m, 2H), 7.53 (d, J = 3.3 Hz, 1H), 6.55 (dd, J = 2.9, 1.5 Hz, 1H). <sup>13</sup>C NMR (101 MHz, Chloroform-d) δ 167.45, 144.94, 133.59, 132.28, 130.96, 130.18, 129.86, 128.97, 128.67, 127.64, 126.63, 125.07, 124.34, 110.05. Spectral data for this compound is consistent with that previously reported.<sup>3</sup>

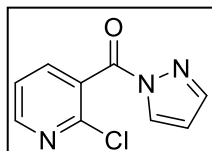

**(2-Chloropyridin-3-yl)(1H-pyrazol-1-yl)methanone (7s).** Obtained as a white solid (0.129 g, 62%). <sup>1</sup>H NMR (300 MHz, Chloroform-d) δ 8.57 (dd, J = 4.9, 1.9 Hz, 1H), 8.42 (dd, J = 2.9, 0.7 Hz, 1H), 7.89 (dd, J = 7.6, 1.9 Hz, 1H), 7.77 (dd, J = 1.4, 0.7 Hz, 1H), 7.40 (dd, J = 7.6, 4.9 Hz, 1H), 6.58 (dd, J = 2.9, 1.4 Hz, 1H). <sup>13</sup>C NMR (101 MHz, Chloroform-d) δ 151.34, 148.32, 145.51, 138.52, 129.83, 129.23, 121.79, 110.92. Spectral data for this compound is consistent with that previously reported.<sup>3</sup>

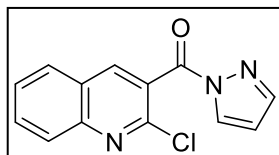

**(2-Chloroquinolin-3-yl)(1H-pyrazol-1-yl)methanone (7t).** Obtained as a yellow solid (0.134 g, 52%). <sup>1</sup>H NMR (300 MHz, Chloroform-d) δ 8.43 (d, J = 3.0 Hz, 1H), 8.36 (s, 1H), 8.04 (d, J = 8.5 Hz, 1H), 7.89 – 7.75 (m, 2H), 7.75 – 7.69 (m, 1H), 7.59 (t, J = 7.6 Hz, 1H), 6.56 (dd, J = 2.9, 1.4 Hz, 1H). <sup>13</sup>C NMR (101 MHz, Chloroform-d) δ 164.28, 148.03, 146.27, 145.41, 139.47, 132.27, 129.31, 128.58, 128.29, 127.95, 127.22, 125.52, 110.85. Spectral data for this compound is consistent with that previously reported.<sup>4</sup>

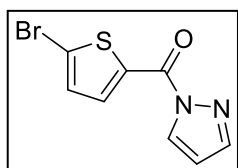

**(5-bromothiophen-2-yl)(1H-pyrazol-1-yl)methanone (7u).** Obtained as a white solid (0.177 g, 69%). <sup>1</sup>H NMR (400 MHz, Chloroform-d) δ 8.40 (d, J = 2.8 Hz, 1H), 8.13 (d, J = 4.2 Hz, 1H), 7.81 (d, J = 1.5 Hz, 1H), 7.18 (d, J = 4.2 Hz, 1H), 6.52 (dd, J = 2.9, 1.5 Hz, 1H). <sup>13</sup>C NMR (101 MHz, Chloroform-d) δ 157.61, 144.02, 138.54, 130.24, 129.55, 127.17, 110.05. Spectral data for this compound is consistent with that previously reported.<sup>3</sup>

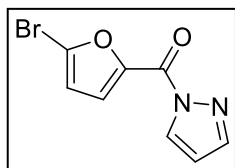

**(5-bromofuran-2-yl)(1H-pyrazol-1-yl)methanone (7v).** Obtained as a yellow solid (0.202 g, 84%).  $^1\text{H NMR}$  (400 MHz, Chloroform-*d*)  $\delta$  8.42 (d,  $J$  = 2.8 Hz, 1H), 8.04 (d,  $J$  = 3.7 Hz, 1H), 7.78 (d,  $J$  = 1.5 Hz, 1H), 6.58 (d,  $J$  = 3.7 Hz, 1H), 6.50 (dd,  $J$  = 2.9, 1.5 Hz, 1H).  $^{13}\text{C NMR}$  (101 MHz, Chloroform-*d*)  $\delta$  153.68, 146.69, 144.68, 130.79, 130.01, 126.96, 114.81, 109.47. Spectral data for this compound is consistent with that previously reported.<sup>3</sup>

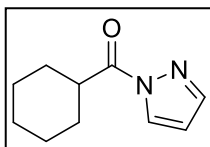

**Cyclohexyl(1H-pyrazol-1-yl)methanone (7w).** Obtained as a clear oil (0.103 g, 58%).  $^1\text{H NMR}$  (400 MHz, Chloroform-*d*)  $\delta$  8.24 (d,  $J$  = 2.7 Hz, 1H), 7.71 (d,  $J$  = 1.5 Hz, 1H), 6.42 (dd,  $J$  = 2.9, 1.5 Hz, 1H), 3.64 (tt,  $J$  = 11.6, 3.5 Hz, 1H), 2.04 – 1.96 (m, 2H), 1.84 (dt,  $J$  = 12.9, 3.5 Hz, 2H), 1.74 (dddd,  $J$  = 12.7, 5.1, 3.4, 1.7 Hz, 1H), 1.57 (qd,  $J$  = 12.3, 3.3 Hz, 2H), 1.42 (qt,  $J$  = 12.6, 3.3 Hz, 2H), 1.30 (tt,  $J$  = 12.3, 3.4 Hz, 1H).  $^{13}\text{C NMR}$  (101 MHz, Chloroform-*d*)  $\delta$  174.87, 143.52, 128.17, 109.13, 41.31, 28.86, 25.53, 25.18. Spectral data for this compound is consistent with that previously reported.<sup>3</sup>

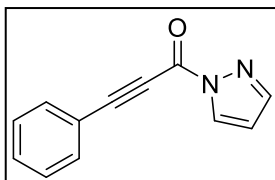

**3-phenyl-1-(1H-pyrazol-1-yl)prop-2-yn-1-one (7z).** Obtained as an orange solid (0.161 g, 82%).  $^1\text{H NMR}$  (400 MHz, Chloroform-*d*)  $\delta$  8.31 (d,  $J$  = 2.9 Hz, 1H), 7.85 (d,  $J$  = 1.4 Hz, 1H), 7.74 – 7.68 (m, 2H), 7.52 – 7.46 (m, 1H), 7.41 (dd,  $J$  = 8.2, 6.7 Hz, 2H), 6.52 (dd,  $J$  = 2.9, 1.5 Hz, 1H).  $^{13}\text{C NMR}$  (101 MHz, Chloroform-*d*)  $\delta$  150.79, 145.49, 133.44, 131.38, 129.58, 128.73, 119.38, 110.44, 95.46, 81.28. Spectral data for this compound is consistent with that previously reported.<sup>3</sup>

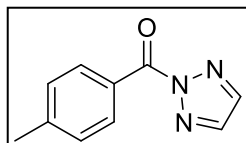

**p-Tolyl(2H-1,2,3-triazol-2-yl)methanone (7ae).** Obtained as a white solid (0.072 g, 39%).  $^1\text{H NMR}$  (400 MHz, Chloroform-*d*)  $\delta$  8.09 – 7.99 (m, 2H), 7.97 (s, 2H), 7.33 (d,  $J$  = 8.1 Hz, 2H), 2.45 (s, 3H).  $^{13}\text{C NMR}$  (101 MHz, Chloroform-*d*)  $\delta$  163.39, 145.04, 138.10, 132.05, 129.12, 127.50, 21.81. Spectral data for this compound is consistent with that previously reported.<sup>5</sup>

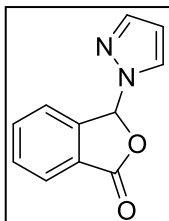

**3-(1H-pyrazol-1-yl)isobenzofuran-1(3H)-one (7ai).** Obtained as a colorless solid (0.170 g, 85%).  $^1\text{H NMR}$  (300 MHz, Chloroform-*d*)  $\delta$  7.99 (dt,  $J$  = 7.5, 1.0 Hz, 1H), 7.73 (dtd,  $J$  = 24.9, 7.5, 1.1 Hz, 2H), 7.63 (d,  $J$  = 1.8 Hz, 1H), 7.51 (dd,  $J$  = 7.5, 1.0 Hz, 1H), 7.37 (d,  $J$  = 2.5 Hz, 1H), 7.34 (s, 1H), 6.35 (dd,  $J$  = 2.6, 1.8 Hz, 1H).  $^{13}\text{C NMR}$  (101 MHz, Chloroform-*d*)  $\delta$  167.90, 143.67, 141.93, 135.03, 131.35, 129.09, 126.91, 125.95, 123.79, 108.00, 87.51. Spectral data for this compound is consistent with that previously reported.<sup>7</sup>

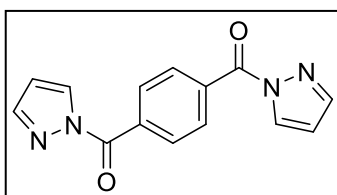

**1,4-phenylenebis((1H-pyrazol-1-yl)methanone) (7aj).** Obtained as a white solid (0.152 g, 57%).  $^1\text{H NMR}$  (400 MHz, Chloroform-*d*)  $\delta$  8.54 (dd,  $J$  = 4.8, 1.9 Hz, 1H), 8.38 (d,  $J$  = 2.9 Hz, 1H), 7.86 (dd,  $J$  = 7.6, 1.9 Hz, 1H), 7.73 (d,  $J$  = 1.4 Hz, 1H), 7.37 (dd,  $J$  = 7.6, 4.9 Hz, 1H), 6.55 (dd,  $J$  = 3.0, 1.5 Hz, 1H).  $^{13}\text{C NMR}$  (101 MHz, Chloroform-*d*)  $\delta$  165.69, 145.03, 135.33, 131.14, 130.53, 110.05. Spectral data for this compound is consistent with that previously reported.<sup>8</sup>



## References

- (1) Rosenau, C. P.; Jelier, B. J.; Gossert, A. D.; Togni, A. *Angew. Chem. Int. Ed.* **2018**, *57*, 9528-9533.
- (2) Miller, S. A.; León Sandoval, A.; Leadbeater, N. E. *Tetrahedron Lett.* **2019**, *61*, 151464.
- (3) Ovian, J. M.; Kelly, C. B.; Pistrutto, V. A.; Leadbeater, N. E. *Org. Lett.* **2017**, *19*, 1286-1289.
- (4) Nandi, J.; Ovian, J. M.; Kelly, C. B.; Leadbeater, N. E. *Org. Biomol. Chem.* **2017**, *15*, 8295-8301.
- (5) Politano, F.; Sandoval, A. L.; Witko, M. L.; Doherty, K. E.; Schroeder, C. M.; Leadbeater, N. E. *Eur. J. Org. Chem.* **2021**. doi.org/10.1002/ejoc.202101239
- (6) Meng, G.; Szostak, R.; Szostak, M. *Org. Lett.* **2017**, *19*, 3596-3599.
- (7) Simić, M. R.; Erić, S.; Lubelska, A.; Latacz, G.; Kiec-Kononowicz, K.; Vojnović, S.; Nikodinović-Runić, J.; Savić, V. M. *J. Serbian Chem. Soc.* **2021**, *86*, 639-649.
- (8) Khan, E.; Khalid, M.; Gul, Z.; Shahzad, A.; Tahir, M. N.; Asif, H. M.; Asim, S.; Braga, A. A. *C. J. Mol. Struct.* **2020**, *1205*, 127633.

# $^1\text{H}$ -, $^{13}\text{C}$ - and $^{19}\text{F}$ -NMR spectra of synthesized compounds

$^1\text{H}$ -NMR (300 MHz  $\text{CDCl}_3$ ) (1*H*-Pyrazol-1-yl)(*p*-tolyl)methanone (7a)

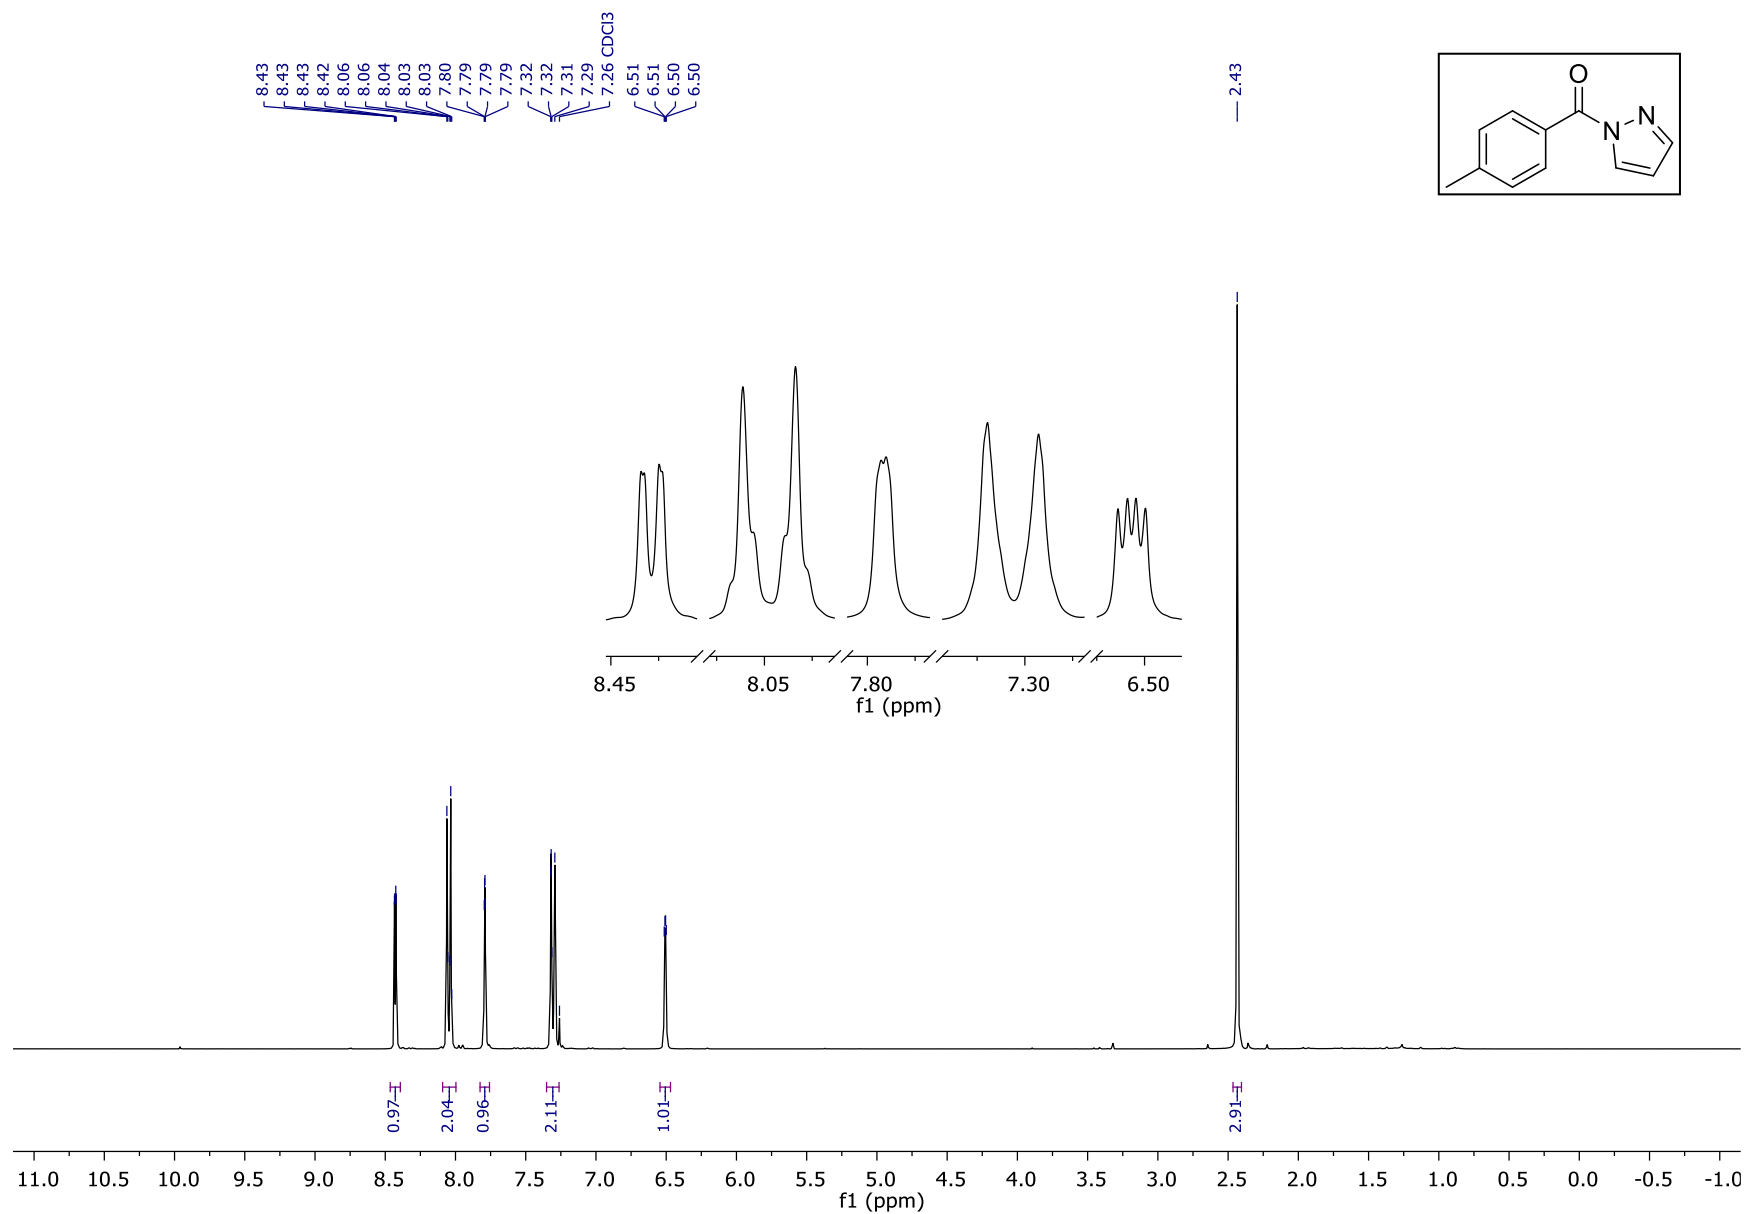

**<sup>1</sup>H-NMR (400 MHz CDCl<sub>3</sub>) (4-Fluorophenyl)(1H-pyrazol-1-yl)methanone (7b)**

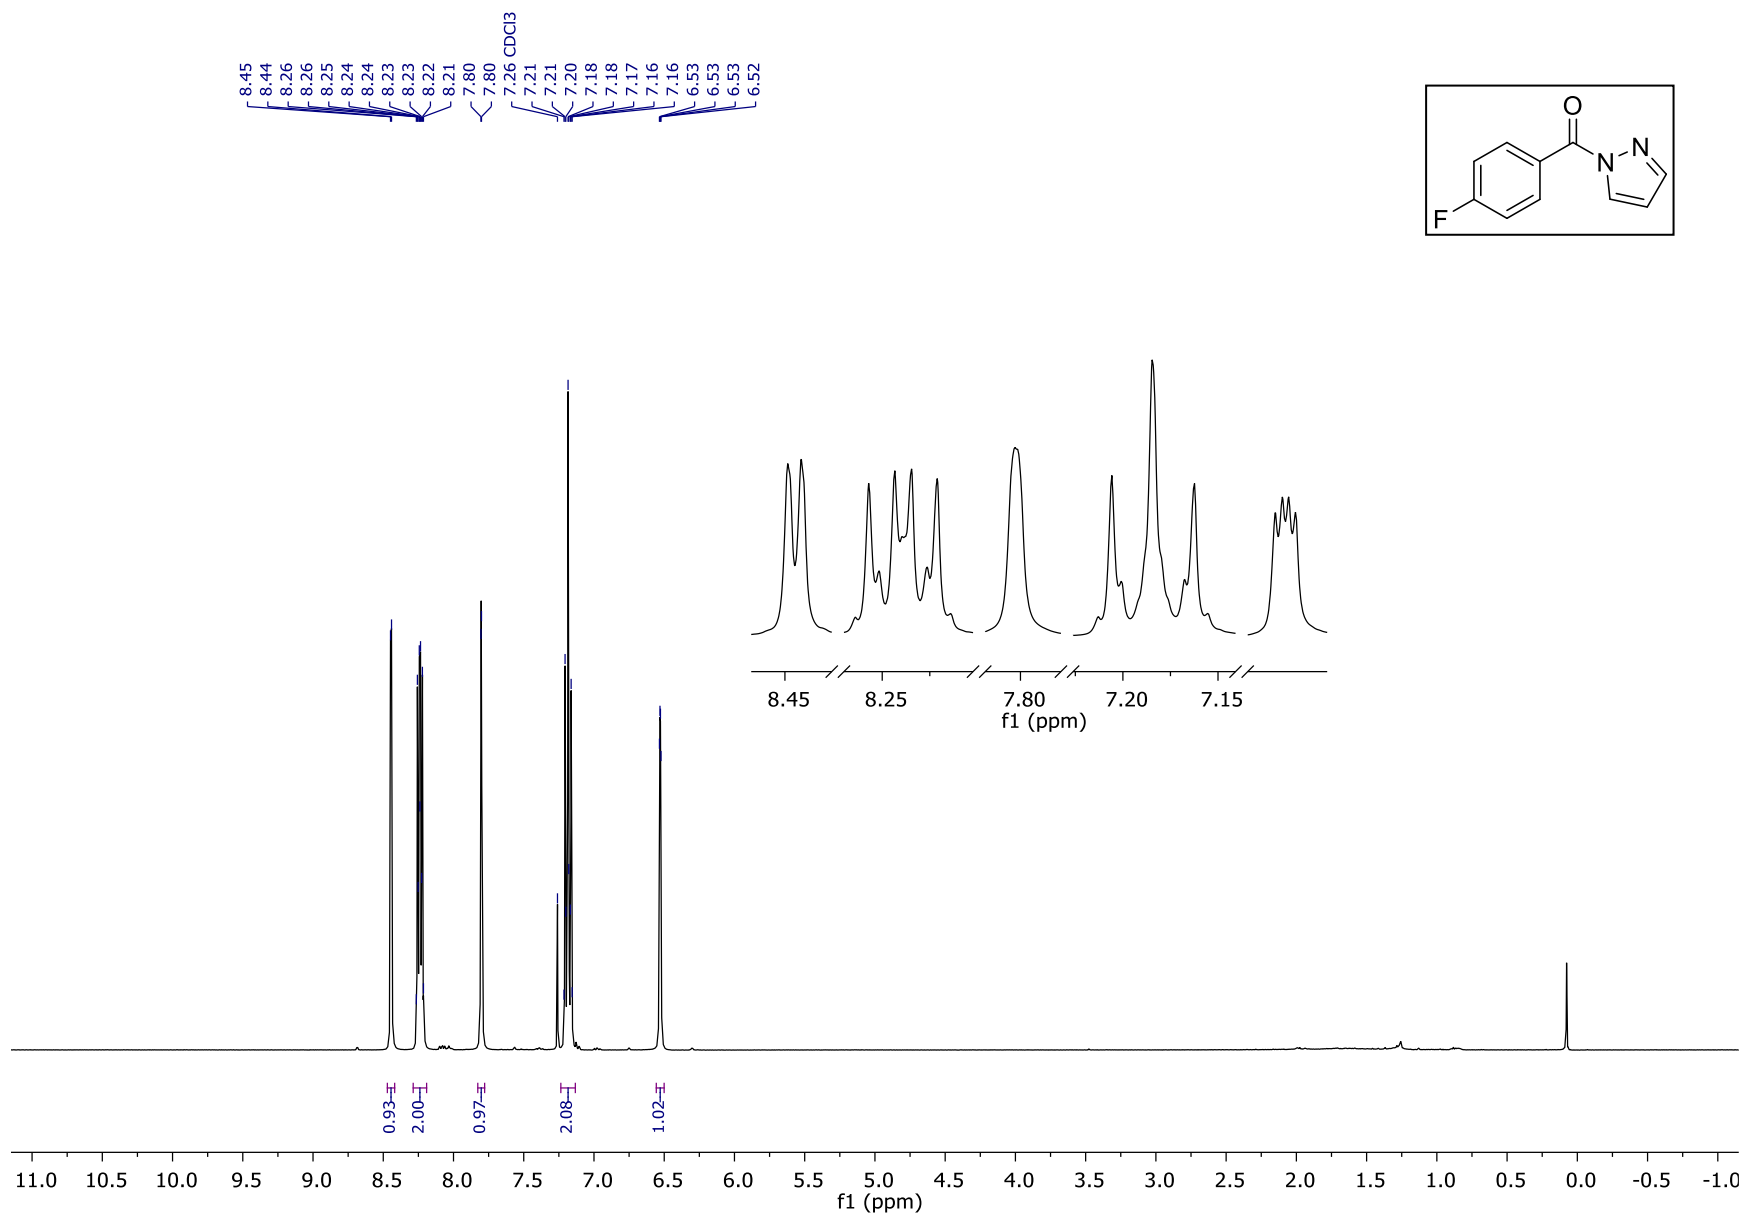

**<sup>1</sup>H-NMR (400 MHz CDCl<sub>3</sub>) (4-(*tert*-Butyl)phenyl)(1*H*-pyrazol-1-yl)methanone (7c)**

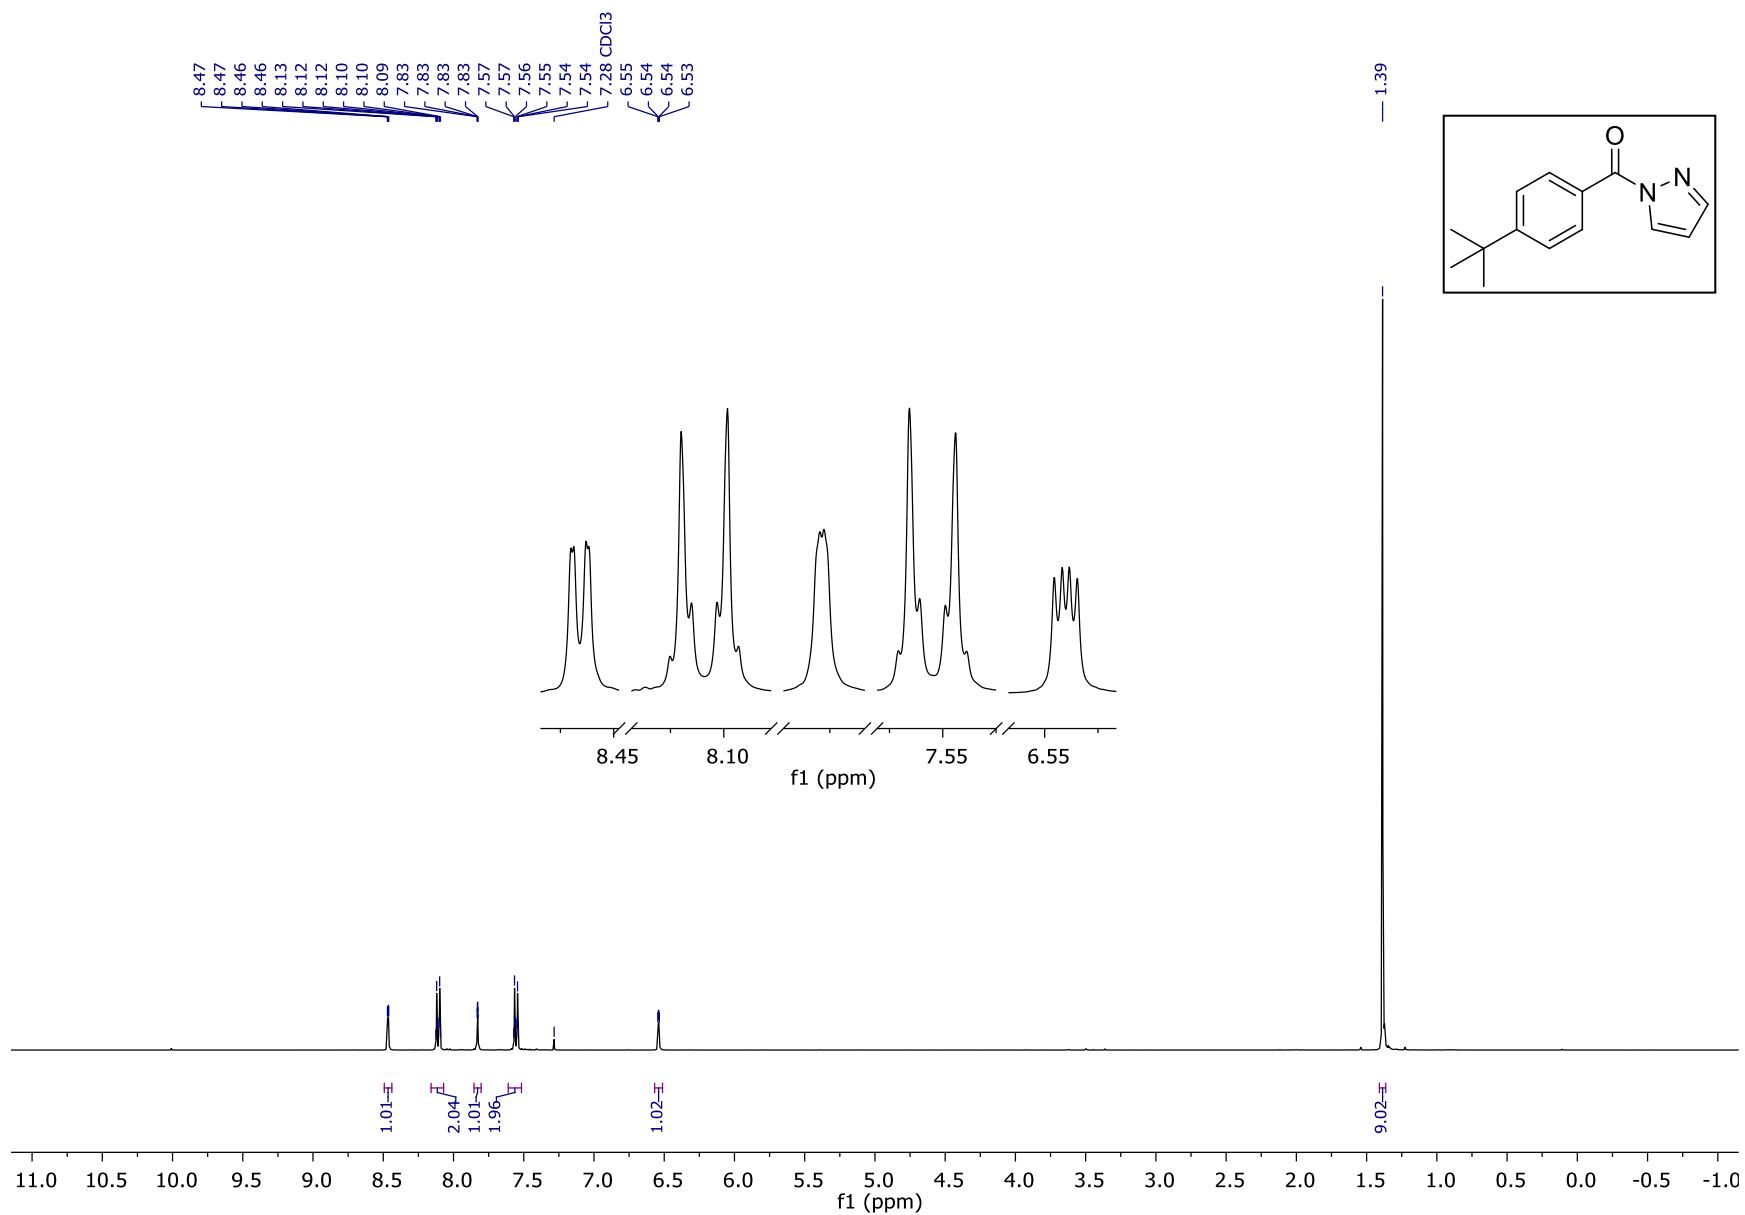

**<sup>1</sup>H-NMR (400 MHz CDCl<sub>3</sub>) Phenyl(1H-pyrazol-1-yl)methanone (7d)**

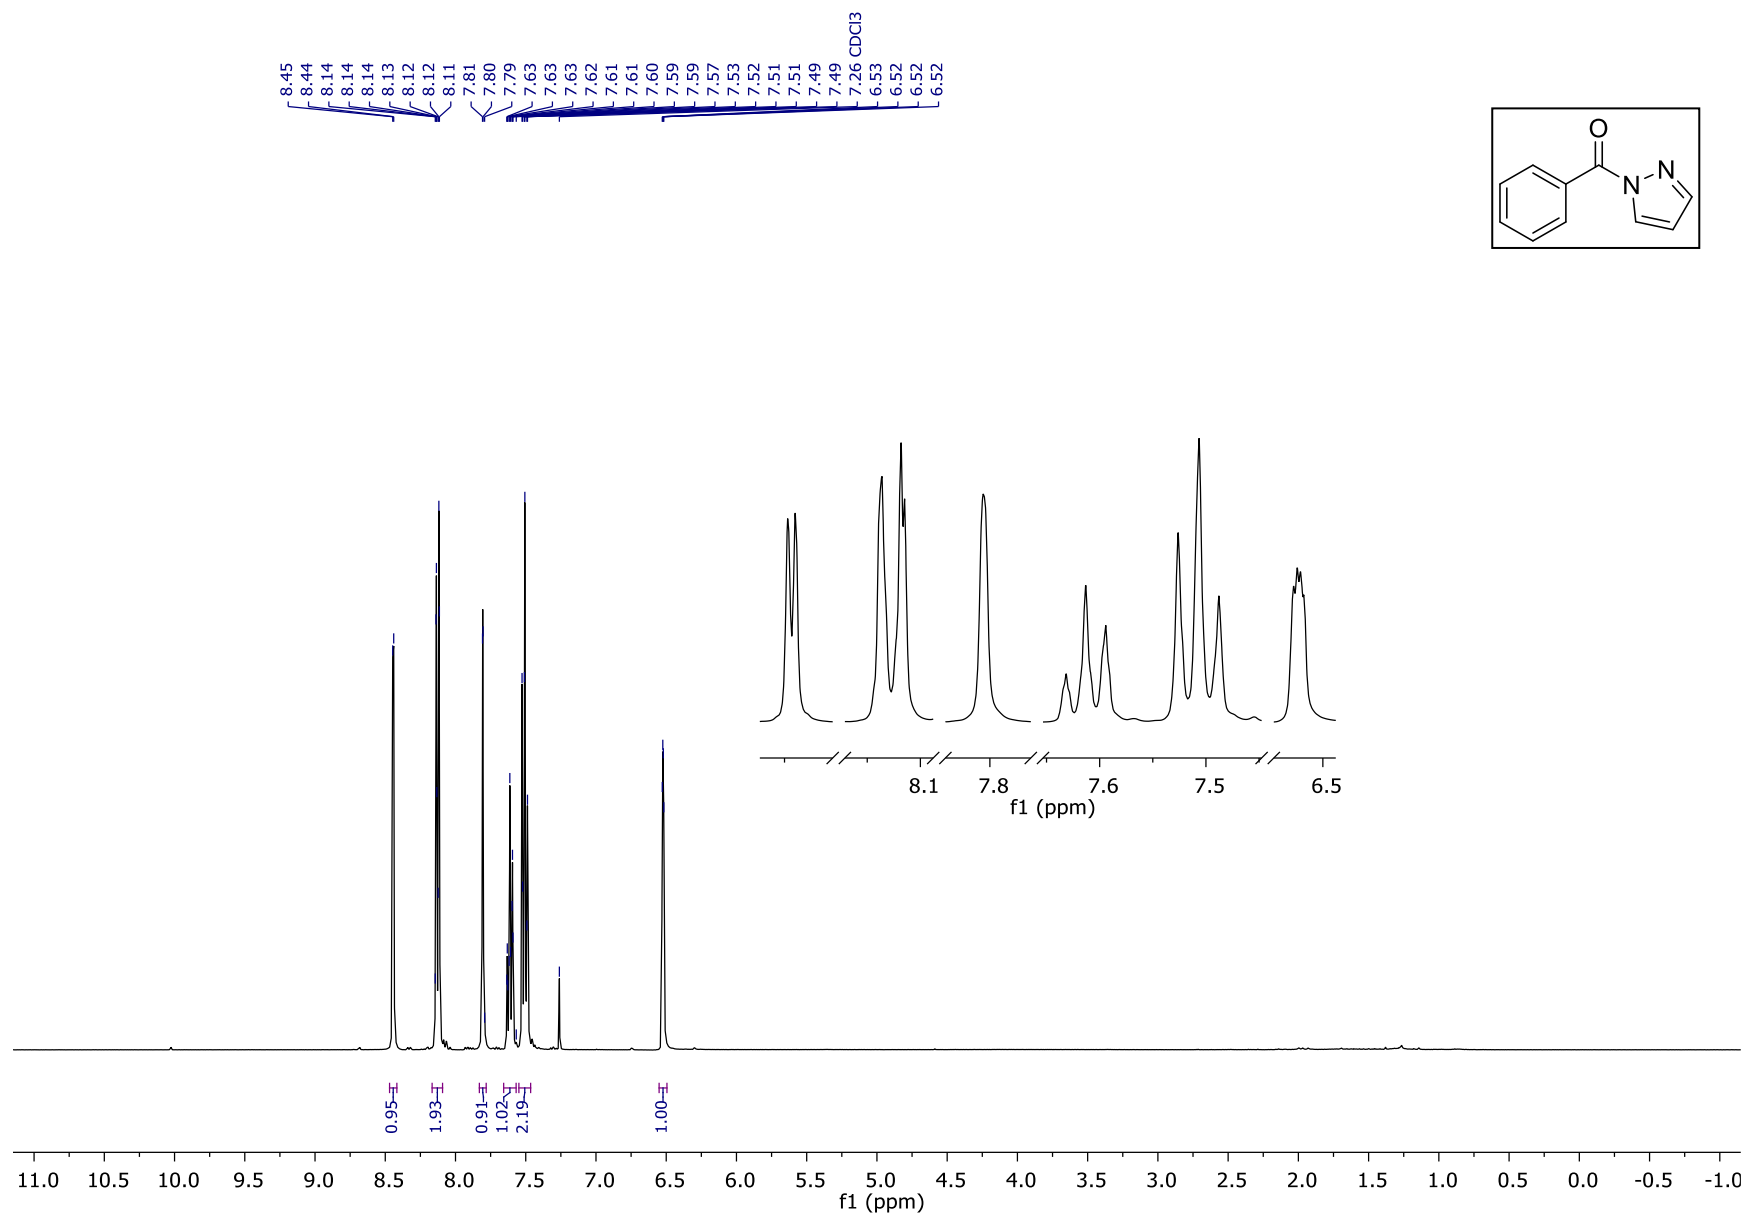

**<sup>1</sup>H-NMR (400 MHz CDCl<sub>3</sub>) (4-Methoxyphenyl)(1H-pyrazol-1-yl)methanone (7e)**

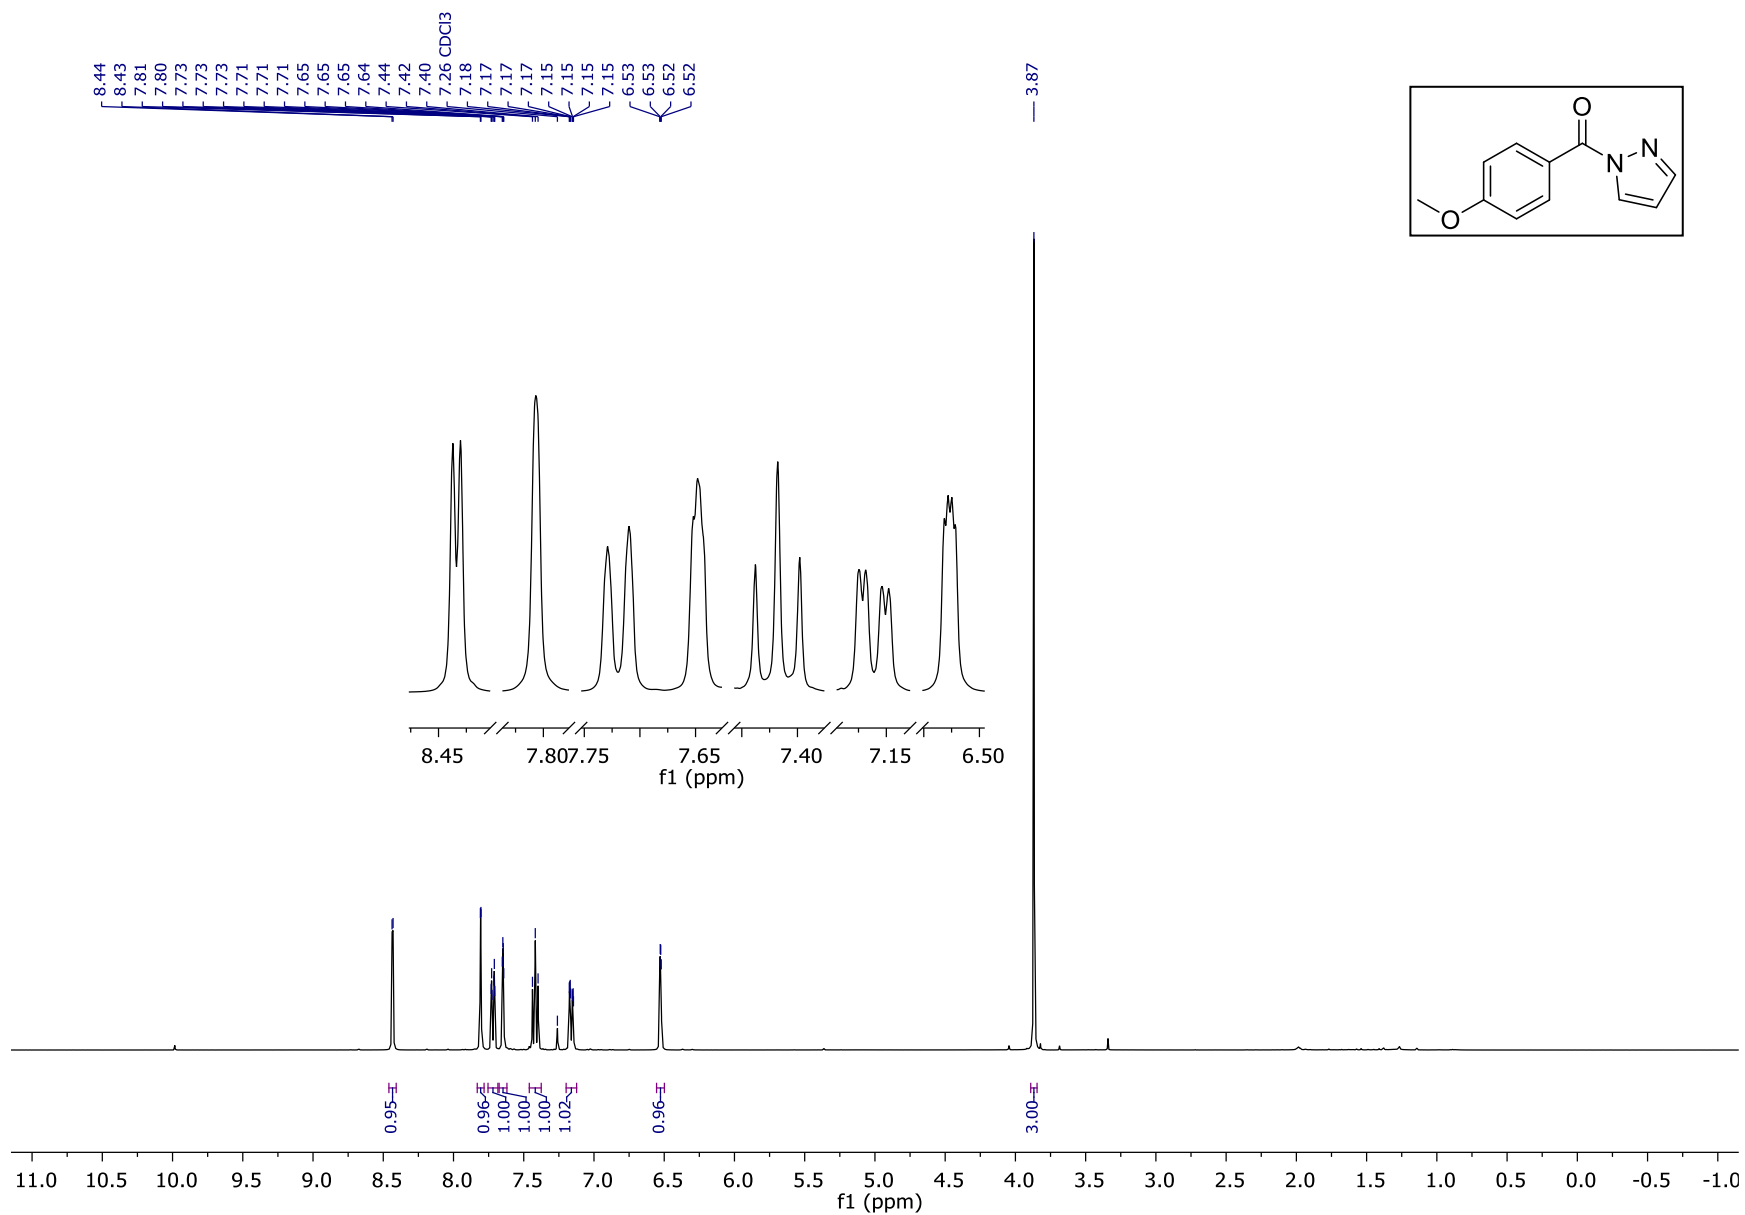

**<sup>1</sup>H-NMR (400 MHz CDCl<sub>3</sub>) (1*H*-Pyrazol-1-yl)(4-(trifluoromethyl)phenyl)methanone (7f)**

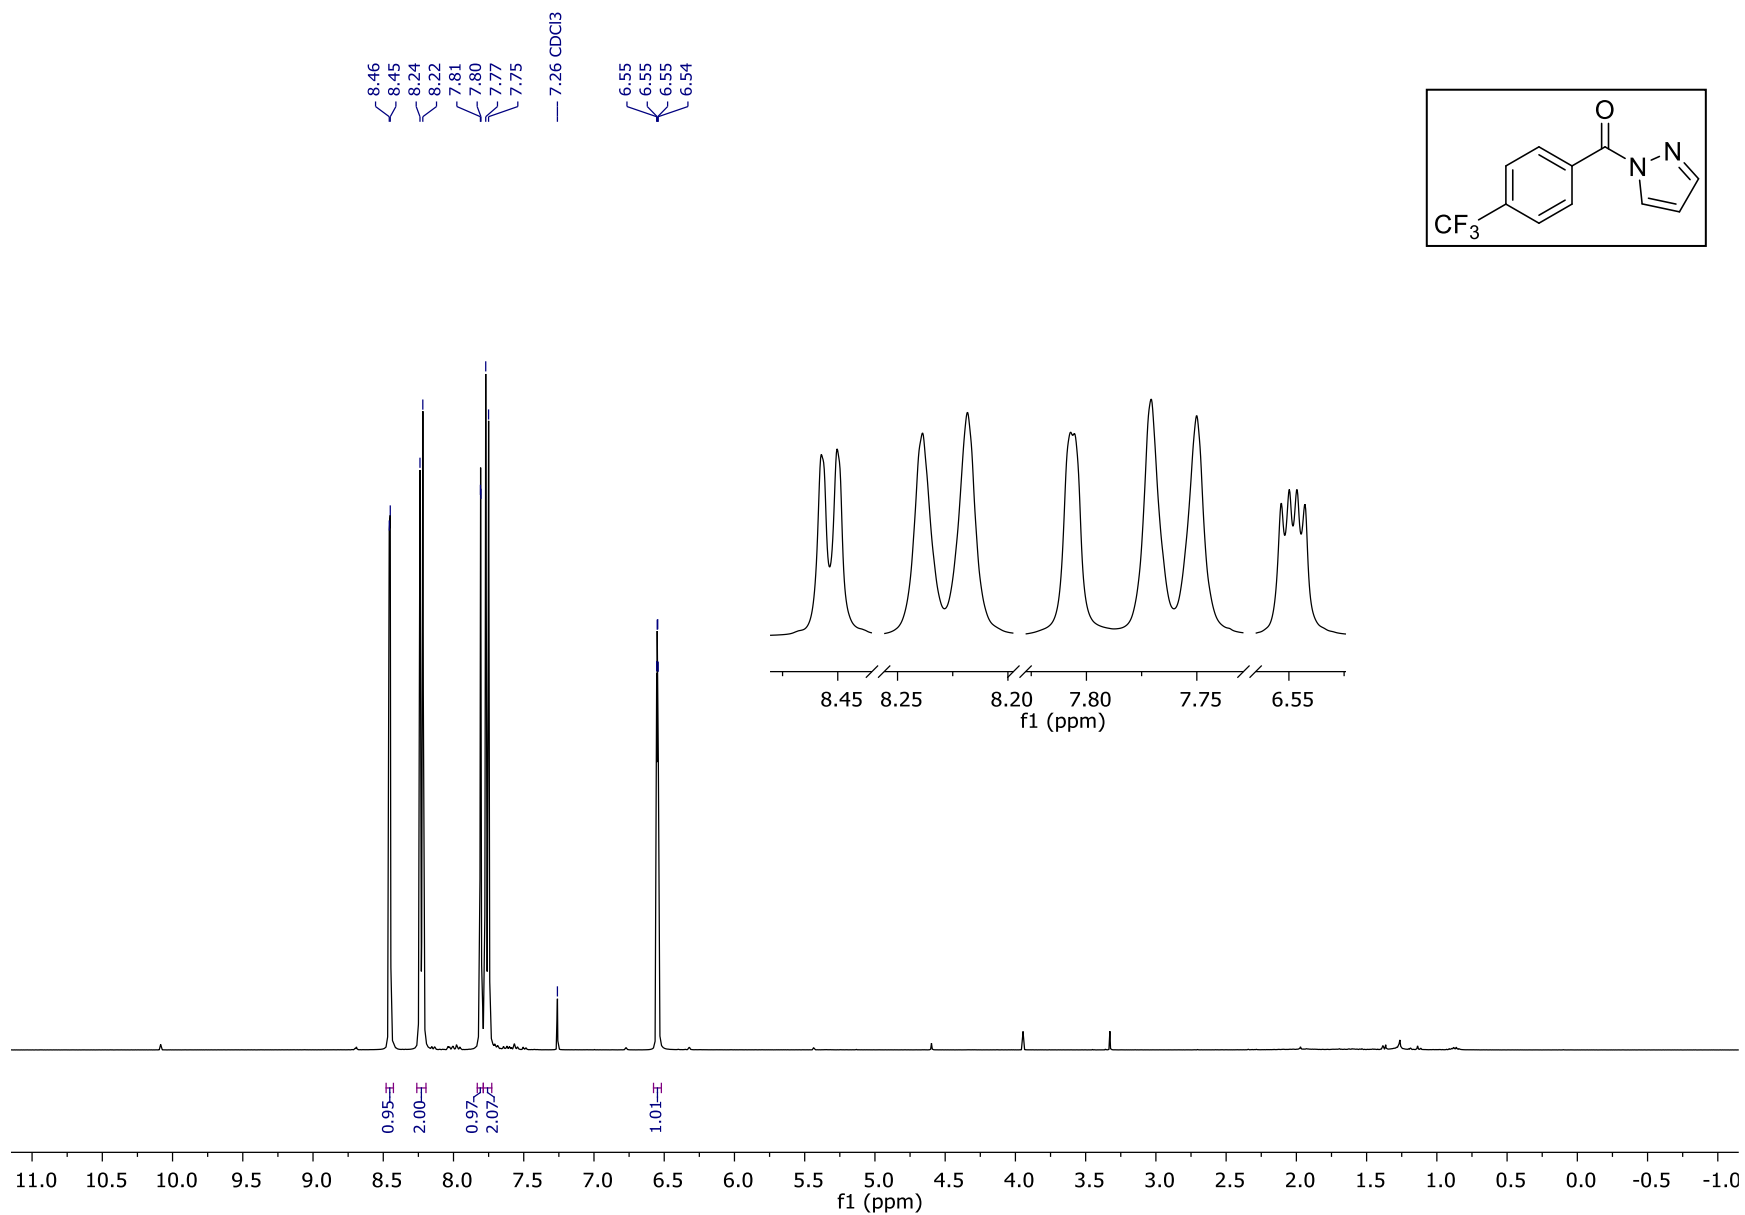

**<sup>1</sup>H-NMR (400 MHz CDCl<sub>3</sub>) 4-(1*H*-Pyrazole-1-carbonyl)benzotrile (7g)**

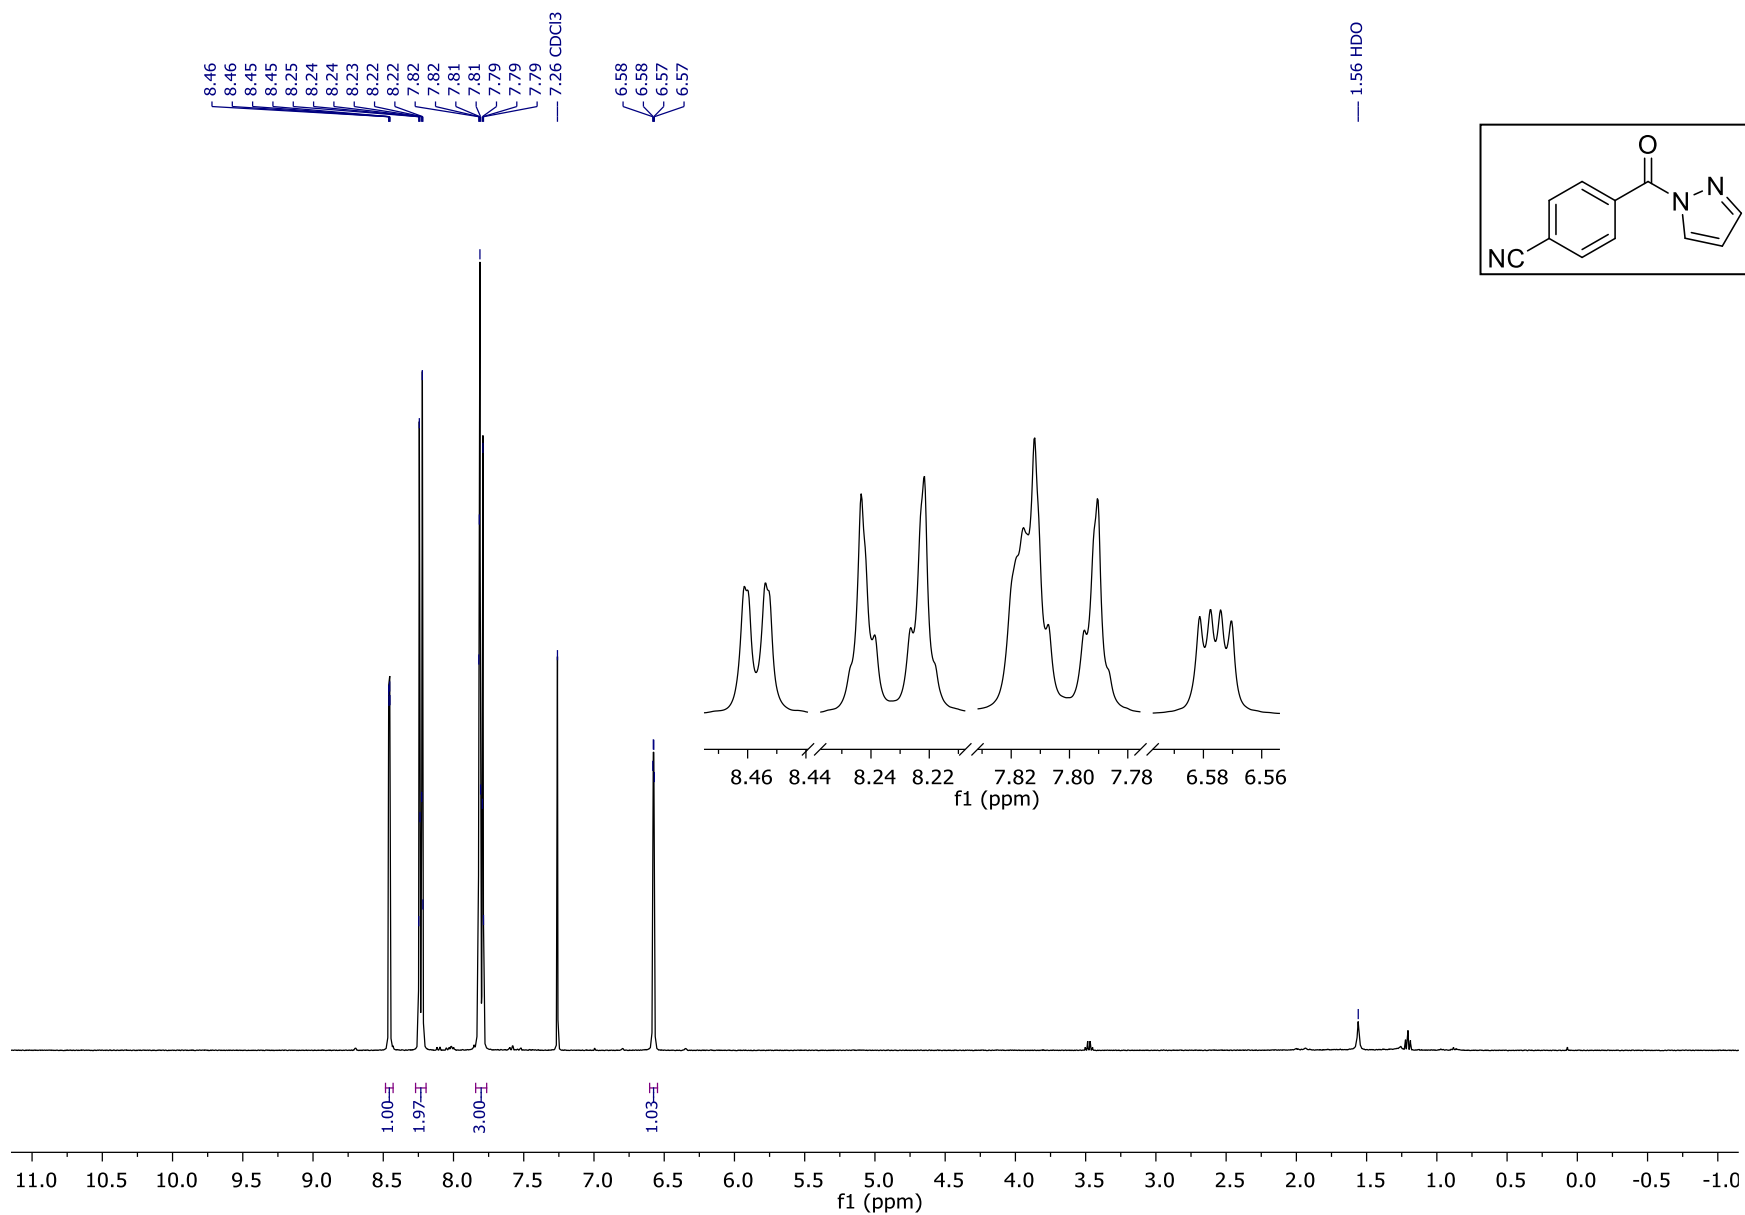



**<sup>1</sup>H-NMR (400 MHz CDCl<sub>3</sub>) (4-Nitrophenyl)(1H-pyrazol-1-yl)methanone (7h)**

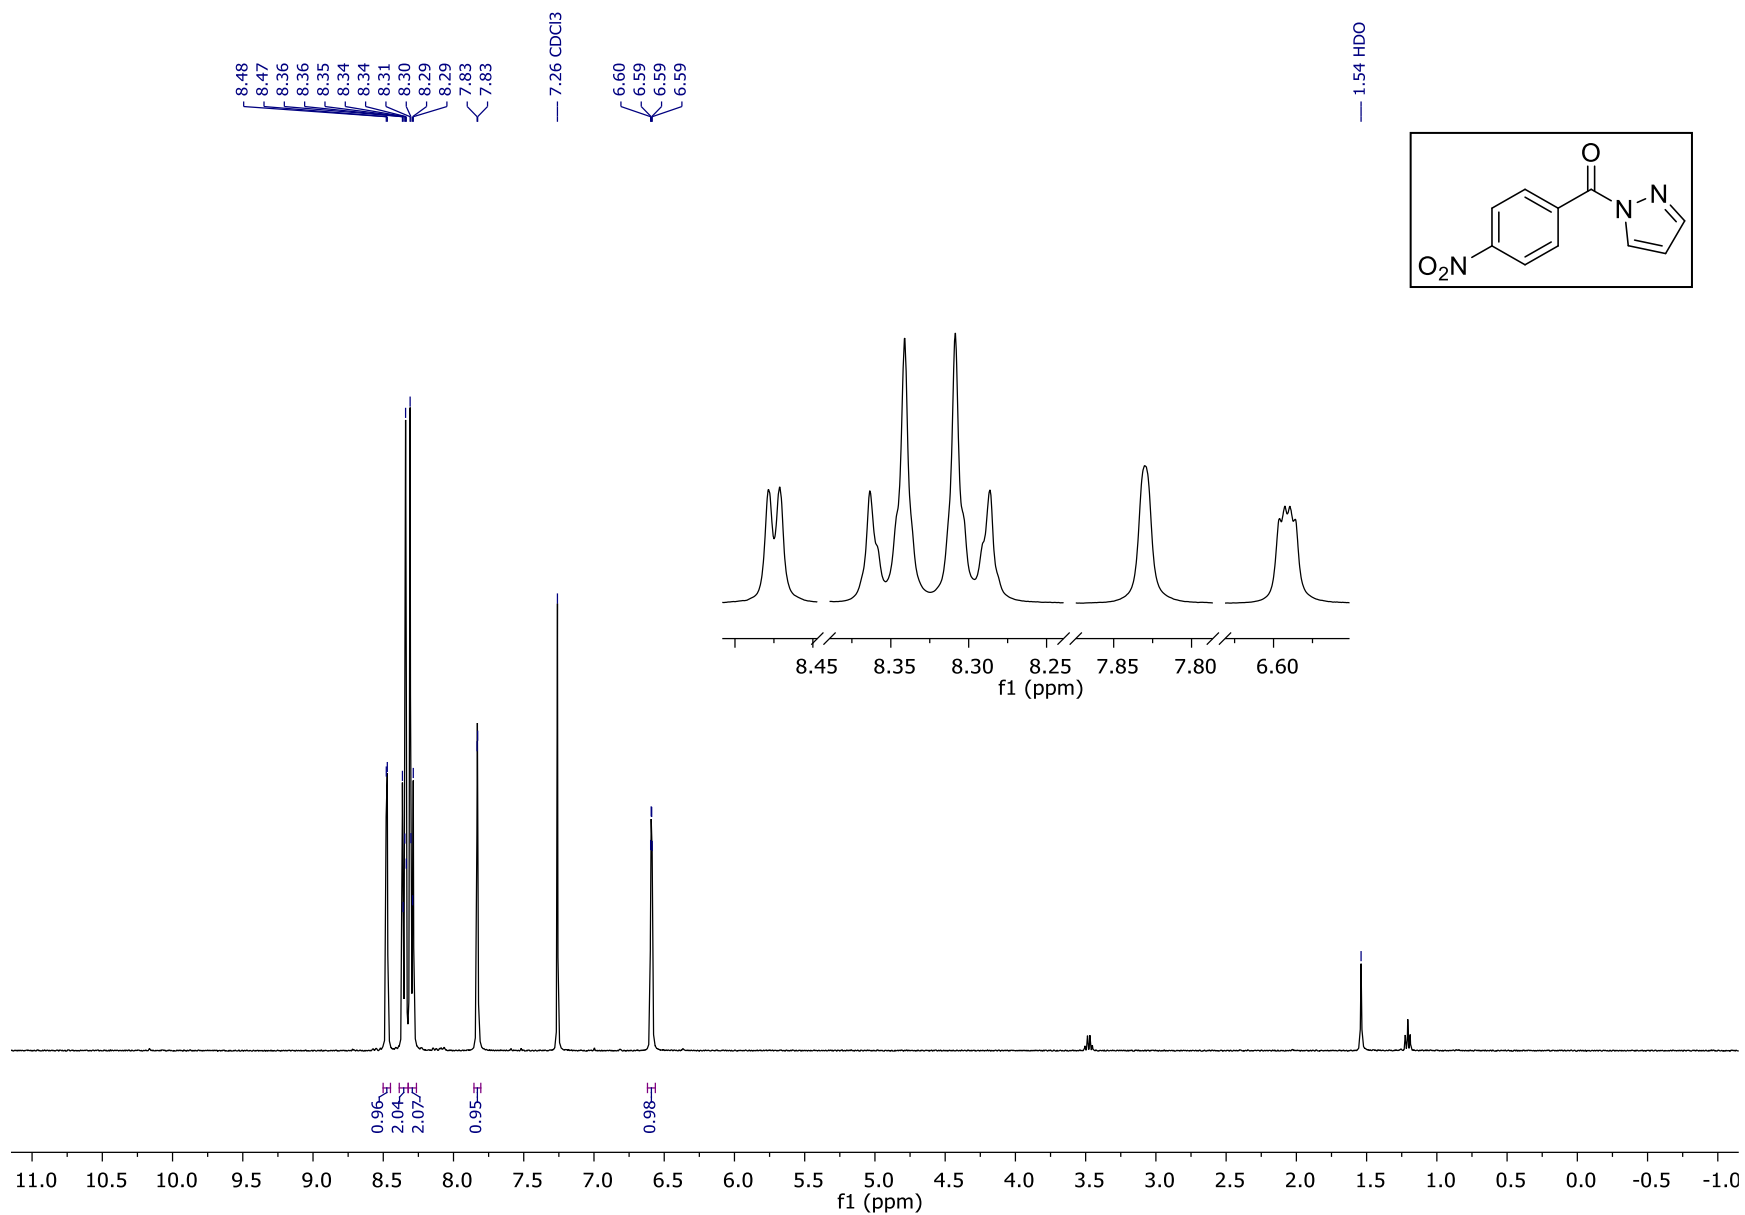

**<sup>1</sup>H-NMR (400 MHz CDCl<sub>3</sub>) Methyl 4-(1*H*-pyrazole-1-carbonyl)benzoate (7i)**

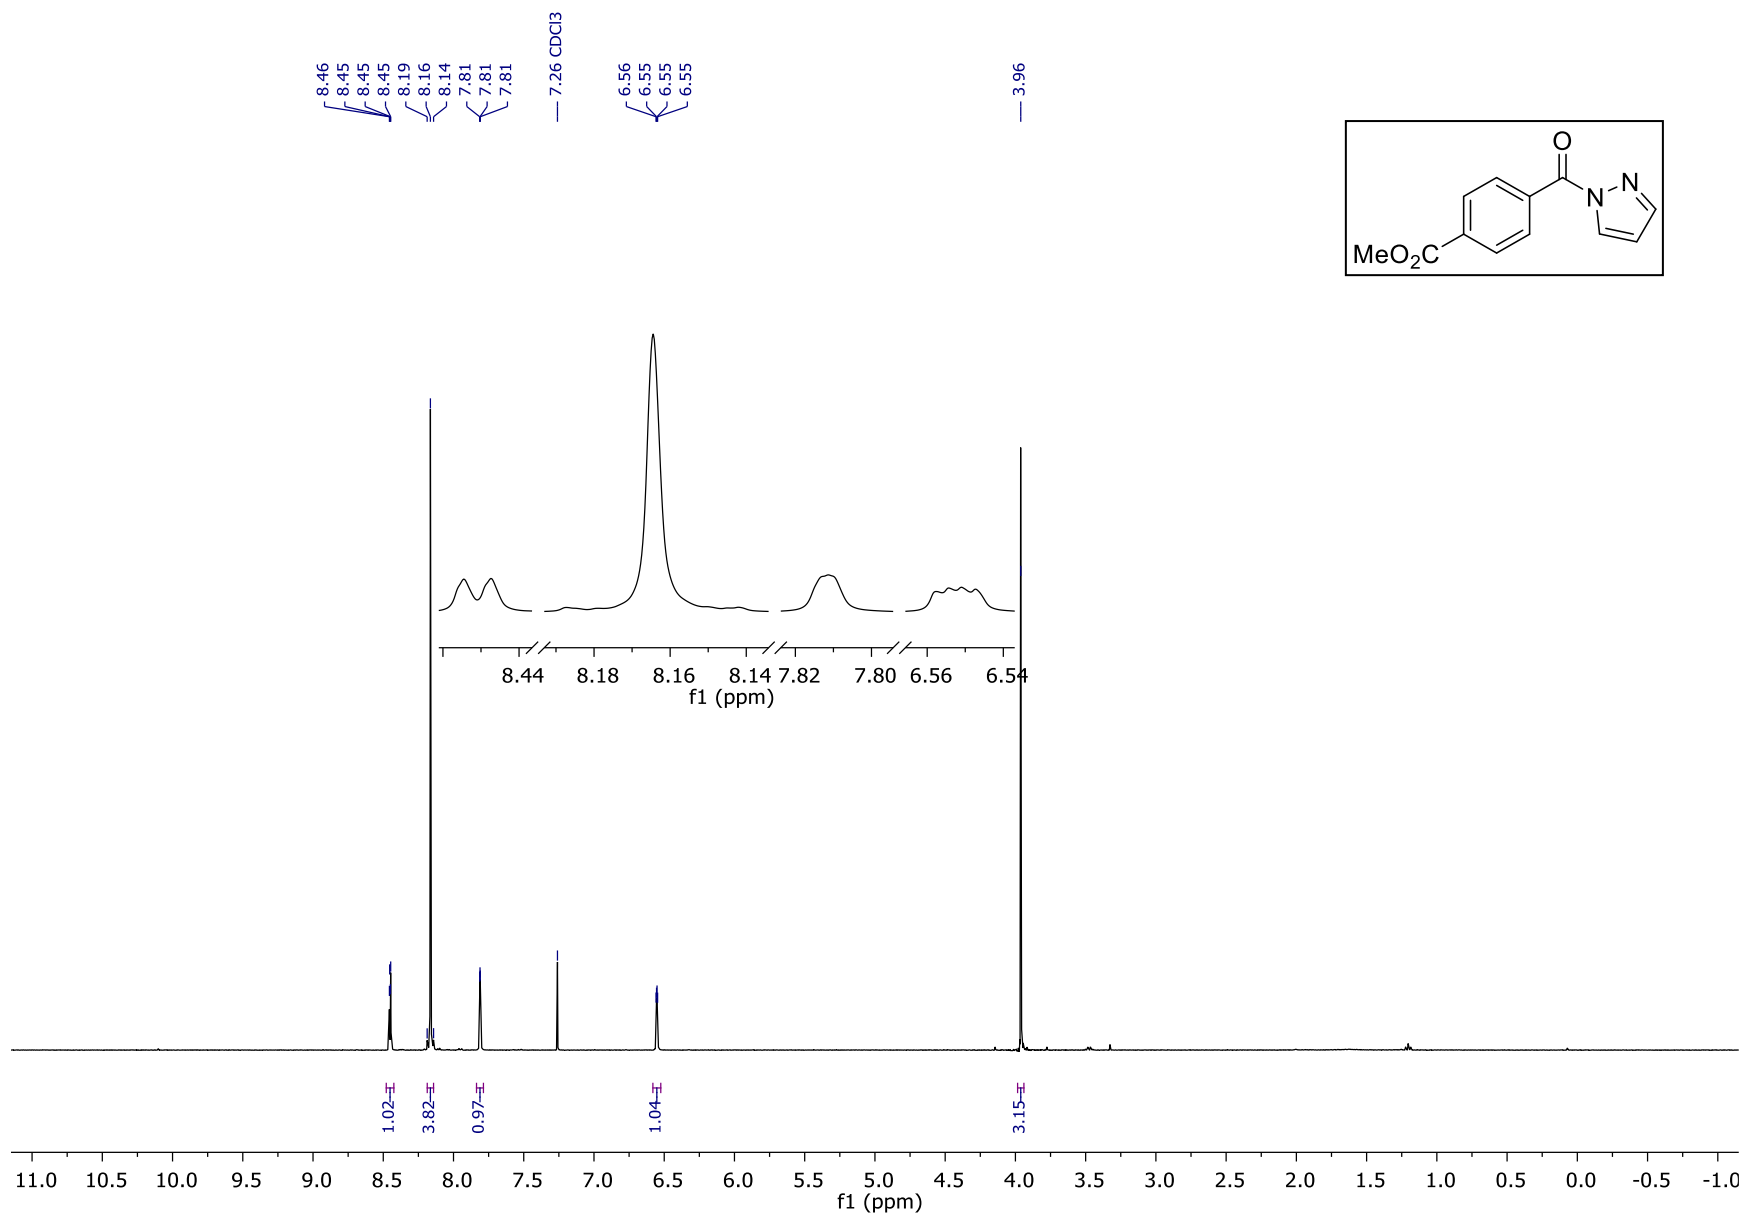

**<sup>1</sup>H-NMR (400 MHz CDCl<sub>3</sub>) (1*H*-Pyrazol-1-yl)(*m*-tolyl)methanone (7j)**

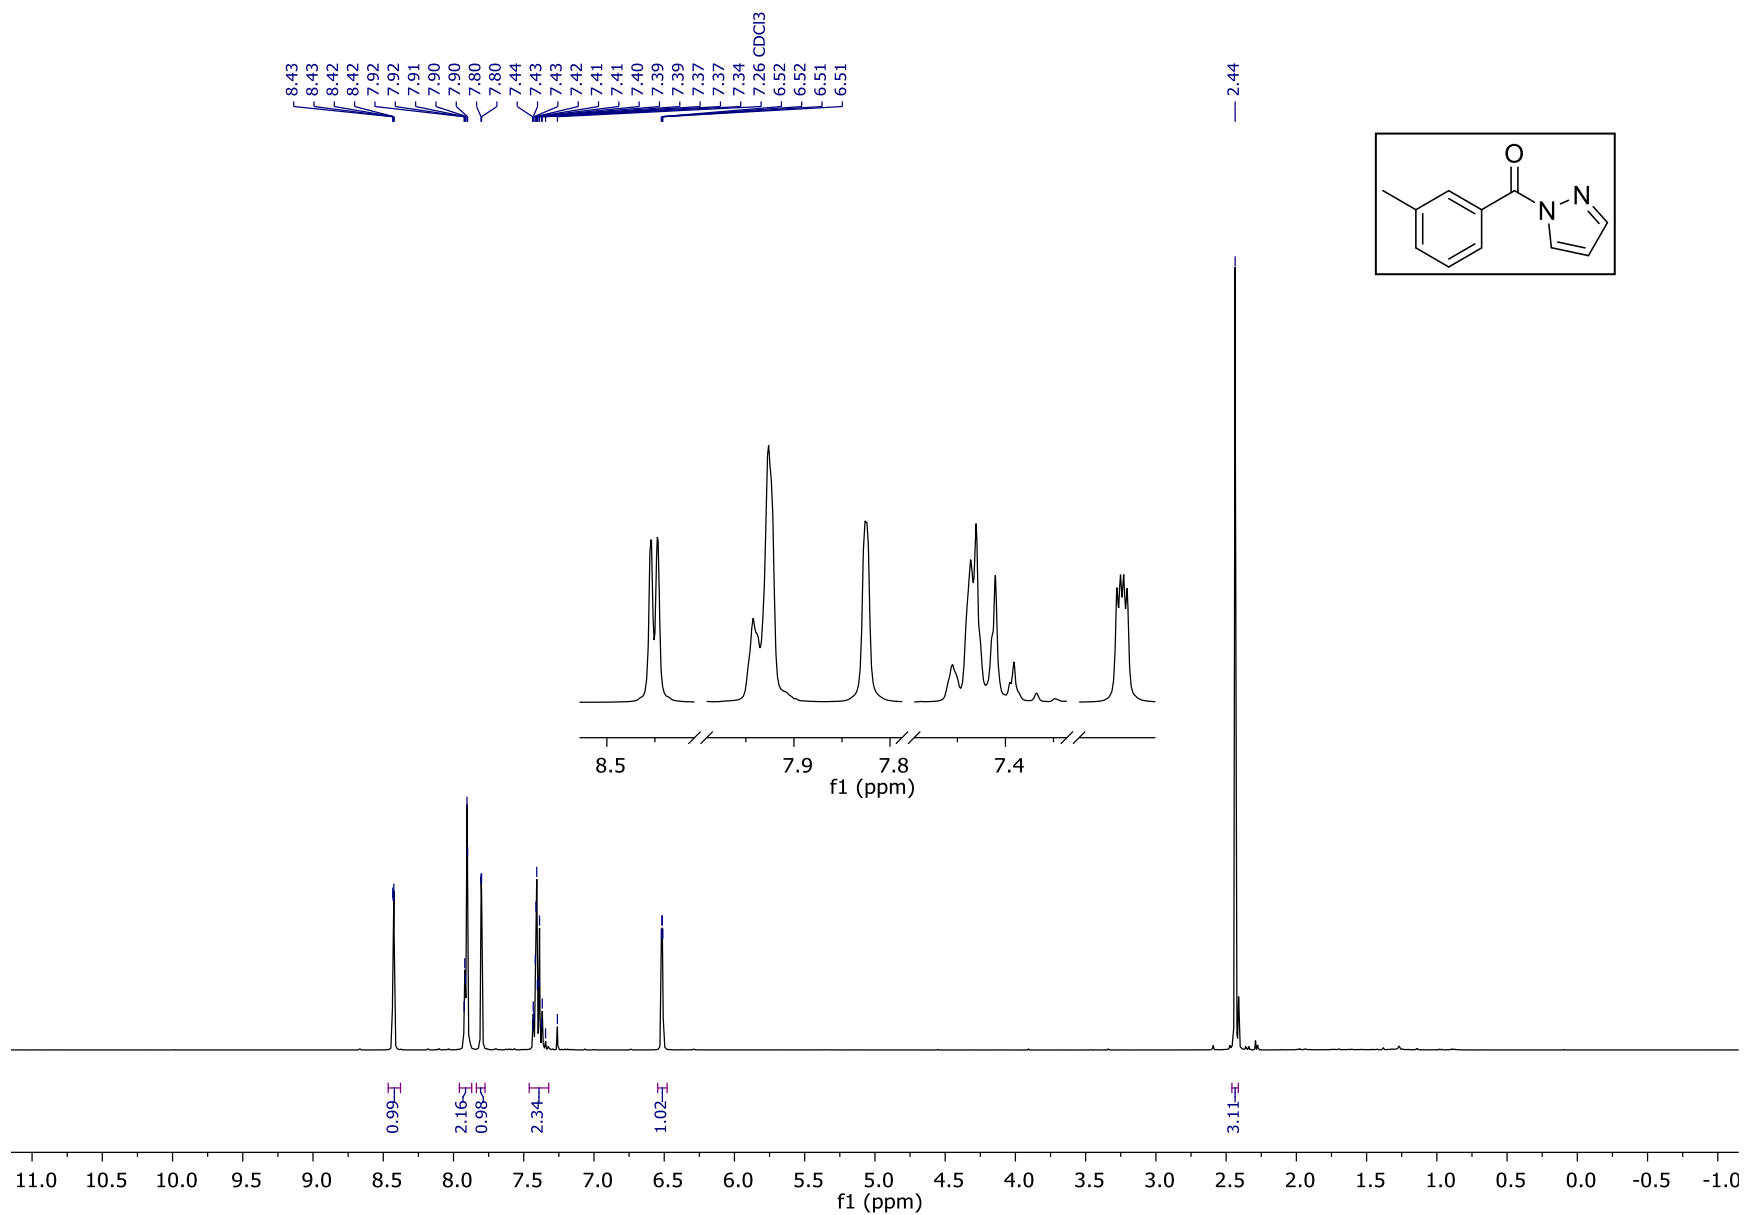

**<sup>1</sup>H-NMR (400 MHz CDCl<sub>3</sub>) (3-Nitrophenyl)(1H-pyrazol-1-yl)methanone (7k)**

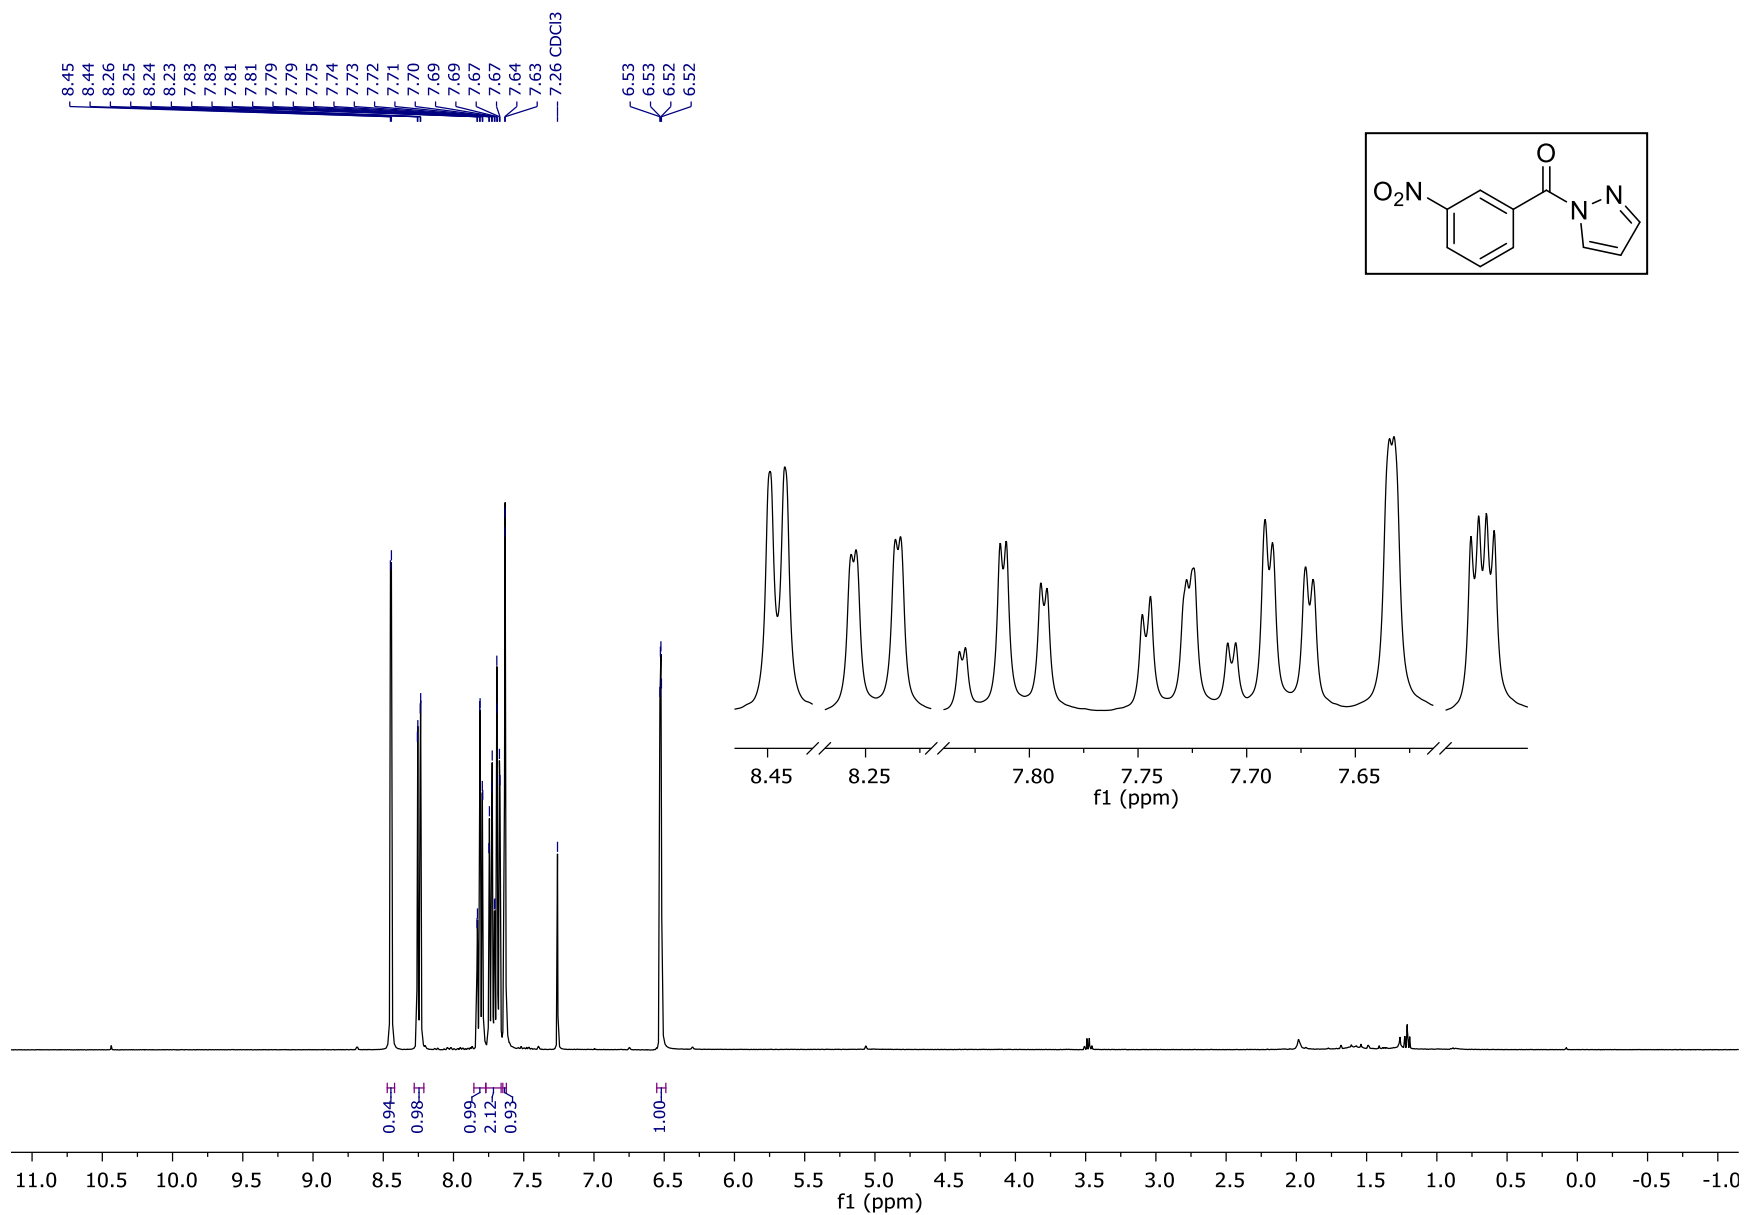

**<sup>1</sup>H-NMR (400 MHz CDCl<sub>3</sub>) (3-Methoxyphenyl)(1H-pyrazol-1-yl)methanone (7I)**

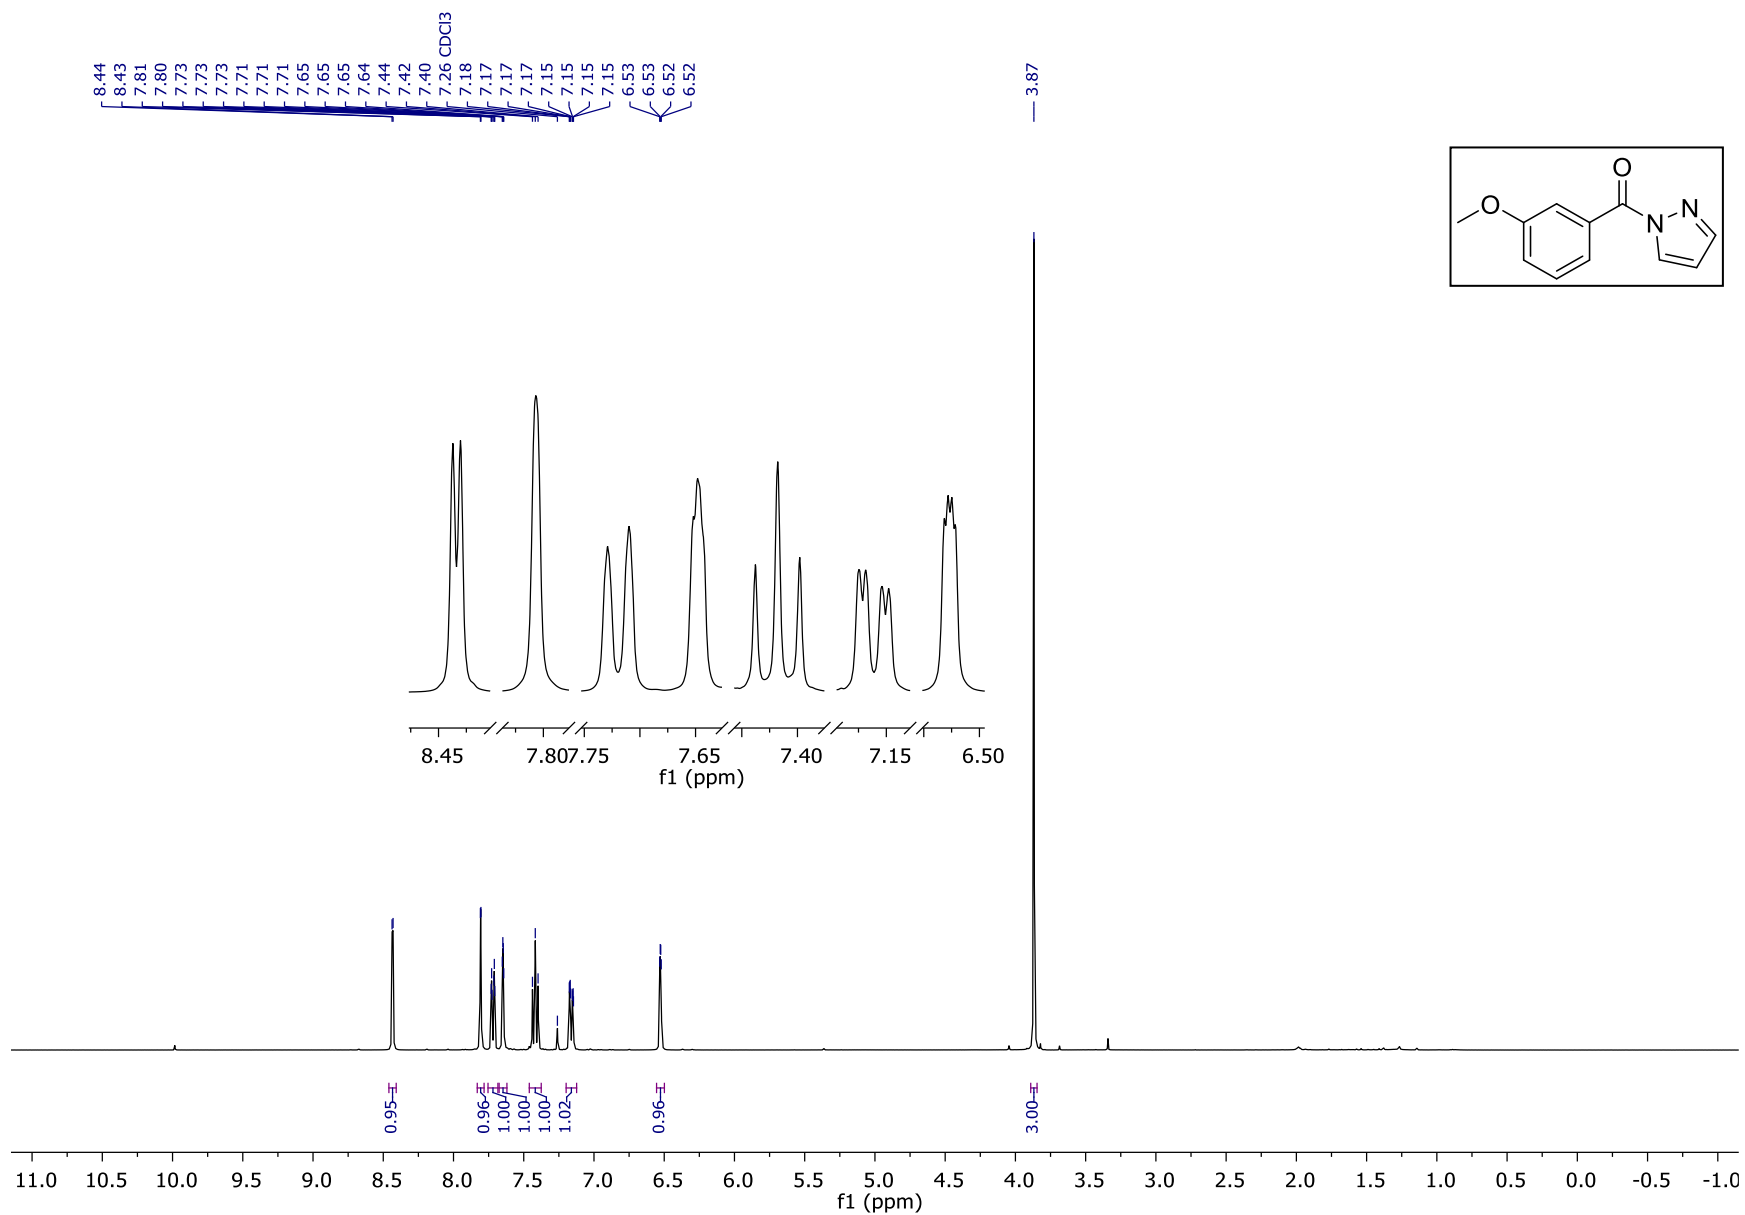

**<sup>1</sup>H-NMR (400 MHz CDCl<sub>3</sub>) (2-Fluorophenyl)(1H-pyrazol-1-yl)methanone (7m)**

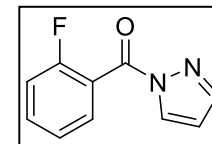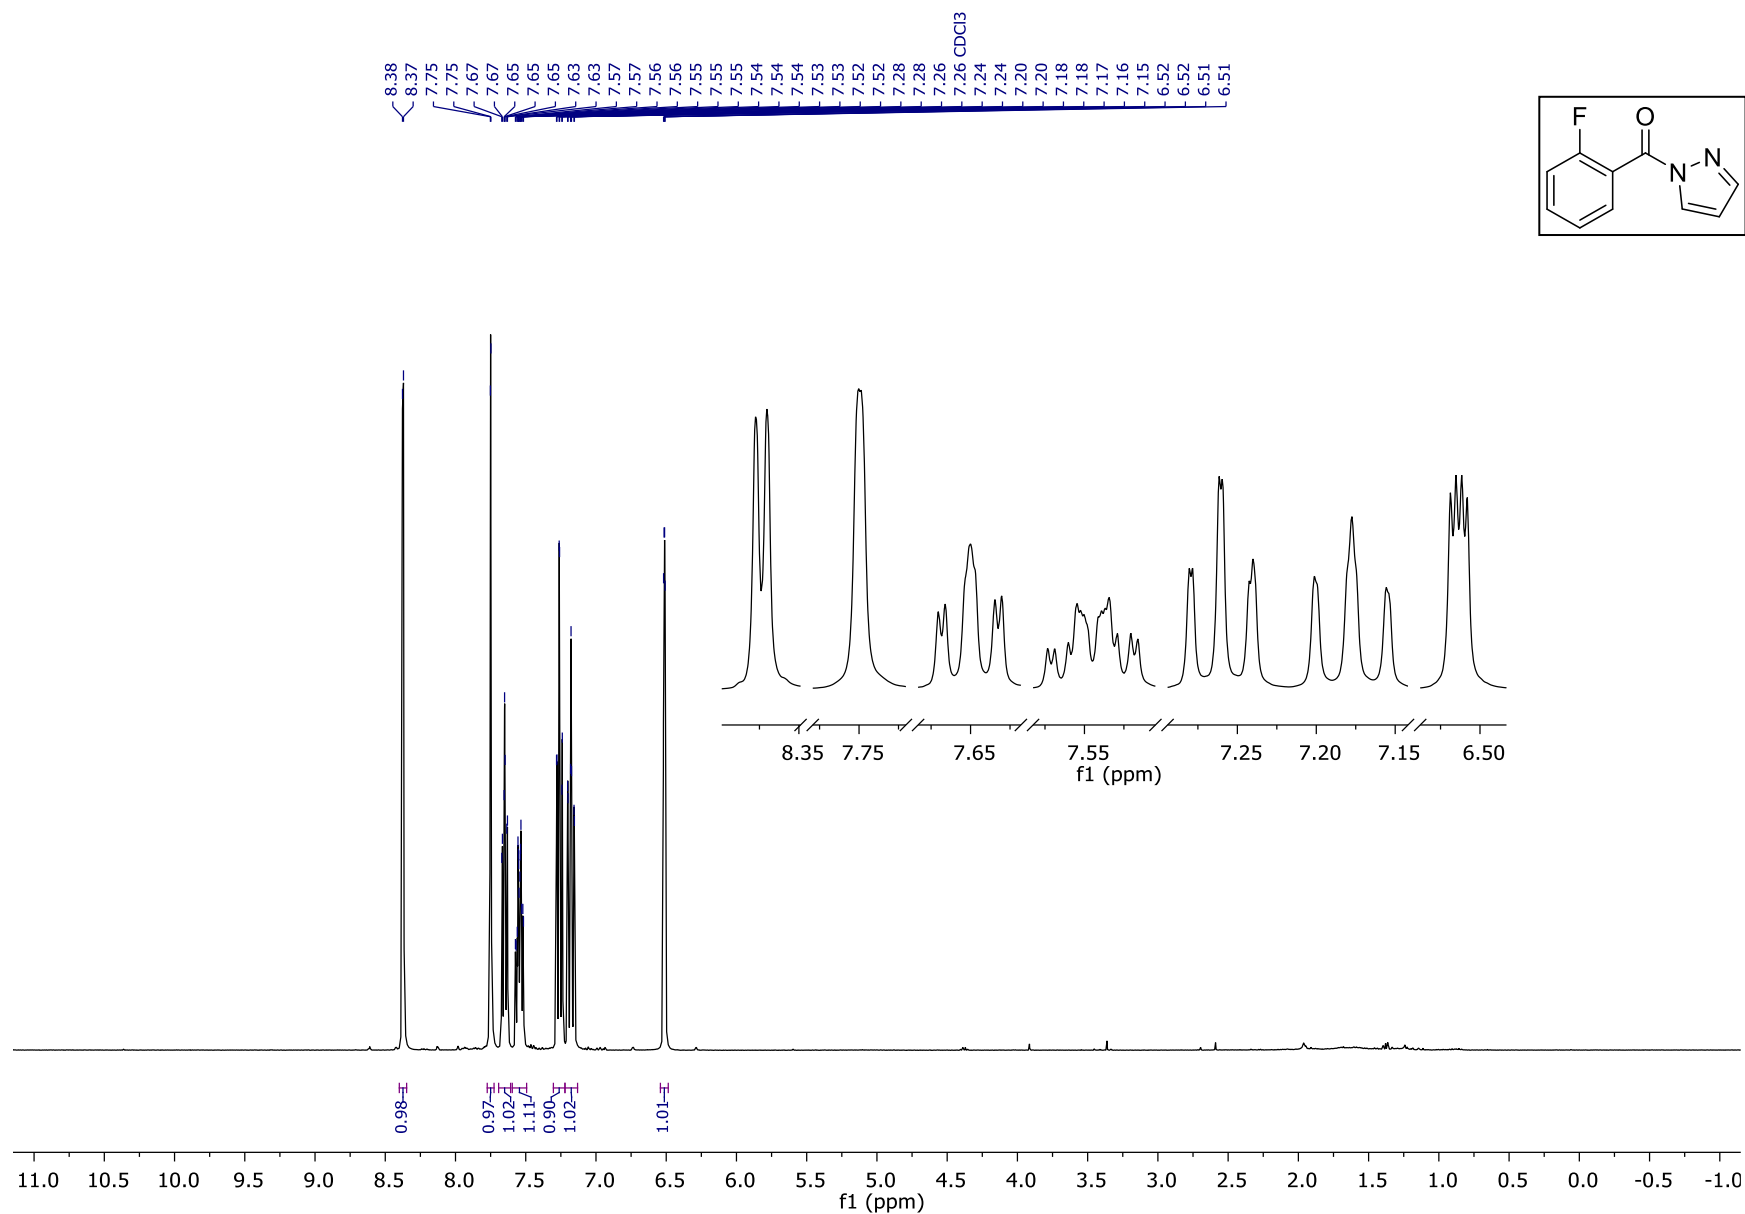

**<sup>1</sup>H-NMR (300 MHz CDCl<sub>3</sub>) (2-Nitrophenyl)(1H-pyrazol-1-yl)methanone (7n)**

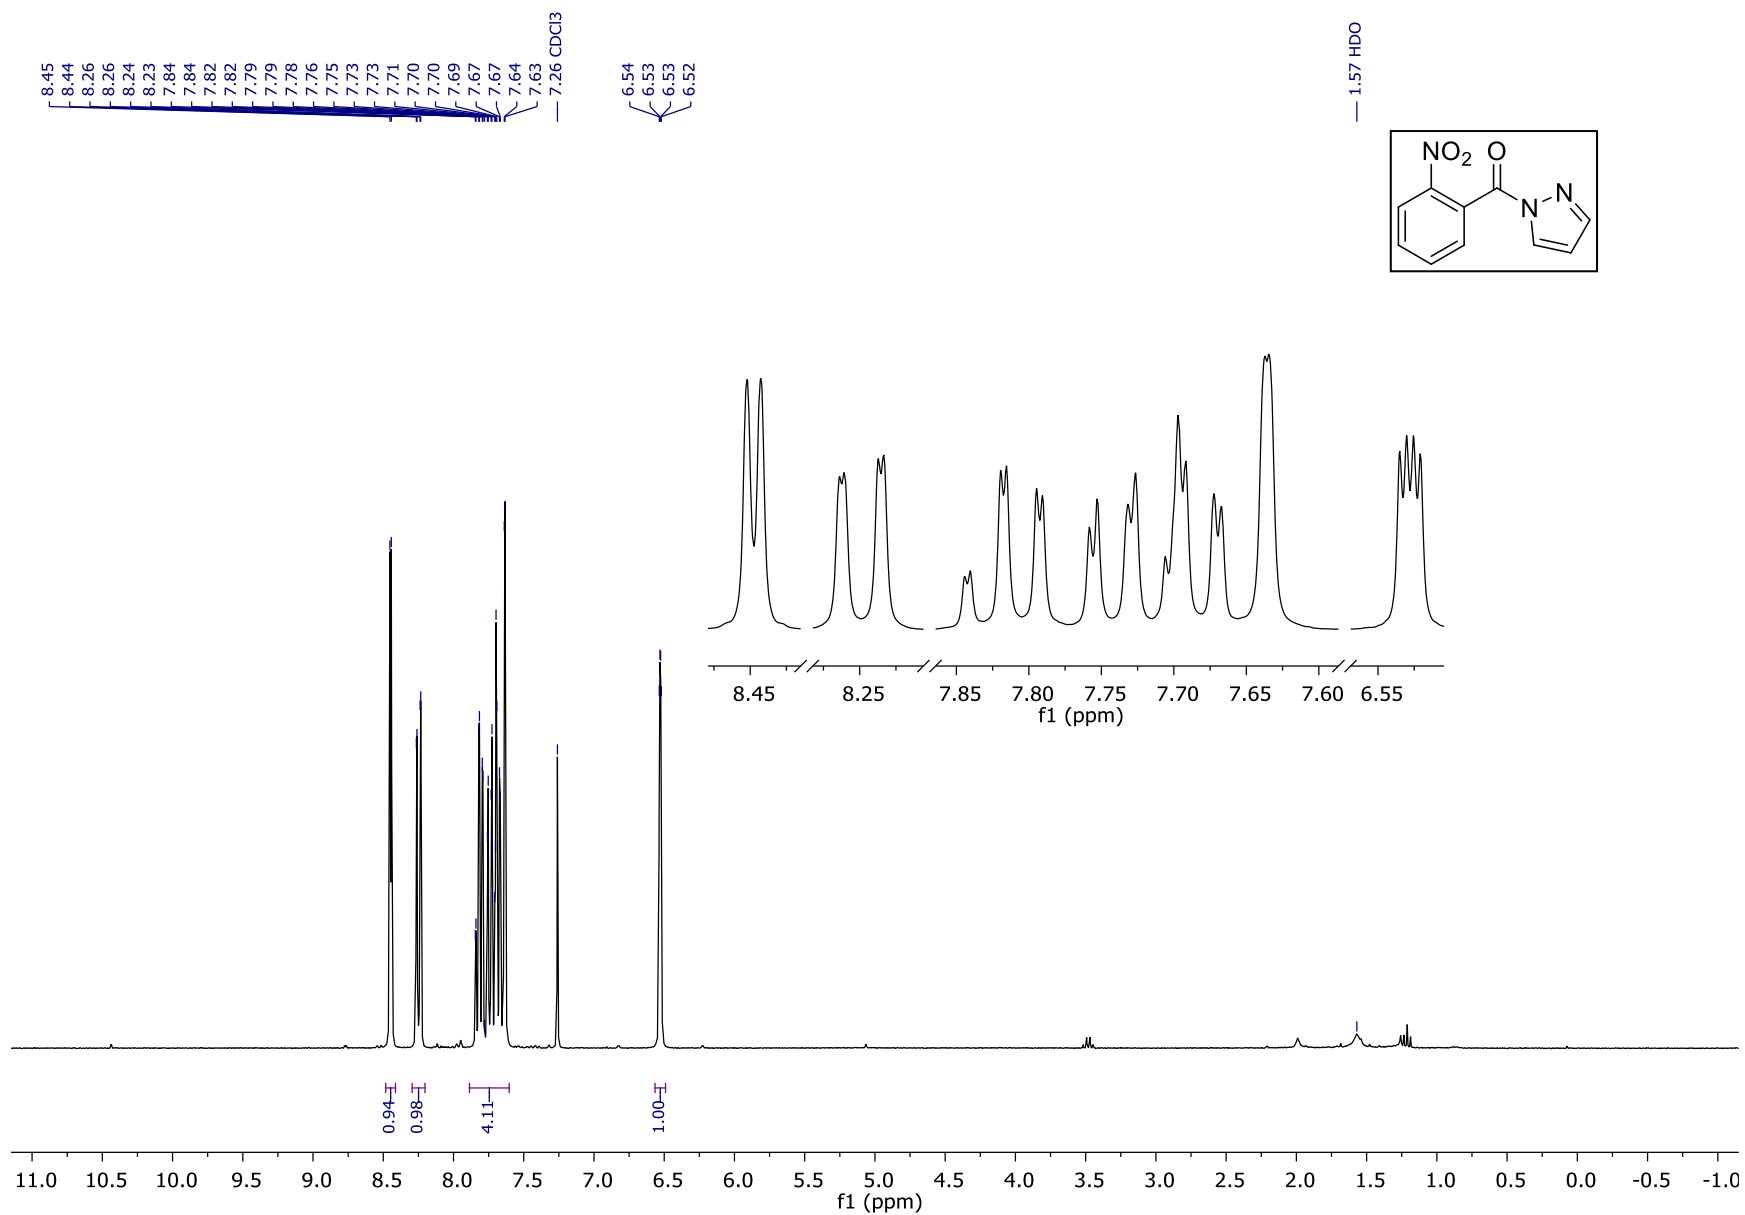

**<sup>1</sup>H-NMR (400 MHz CDCl<sub>3</sub>) (1*H*-Pyrazol-1-yl)(*o*-tolyl)methanone (7o)**

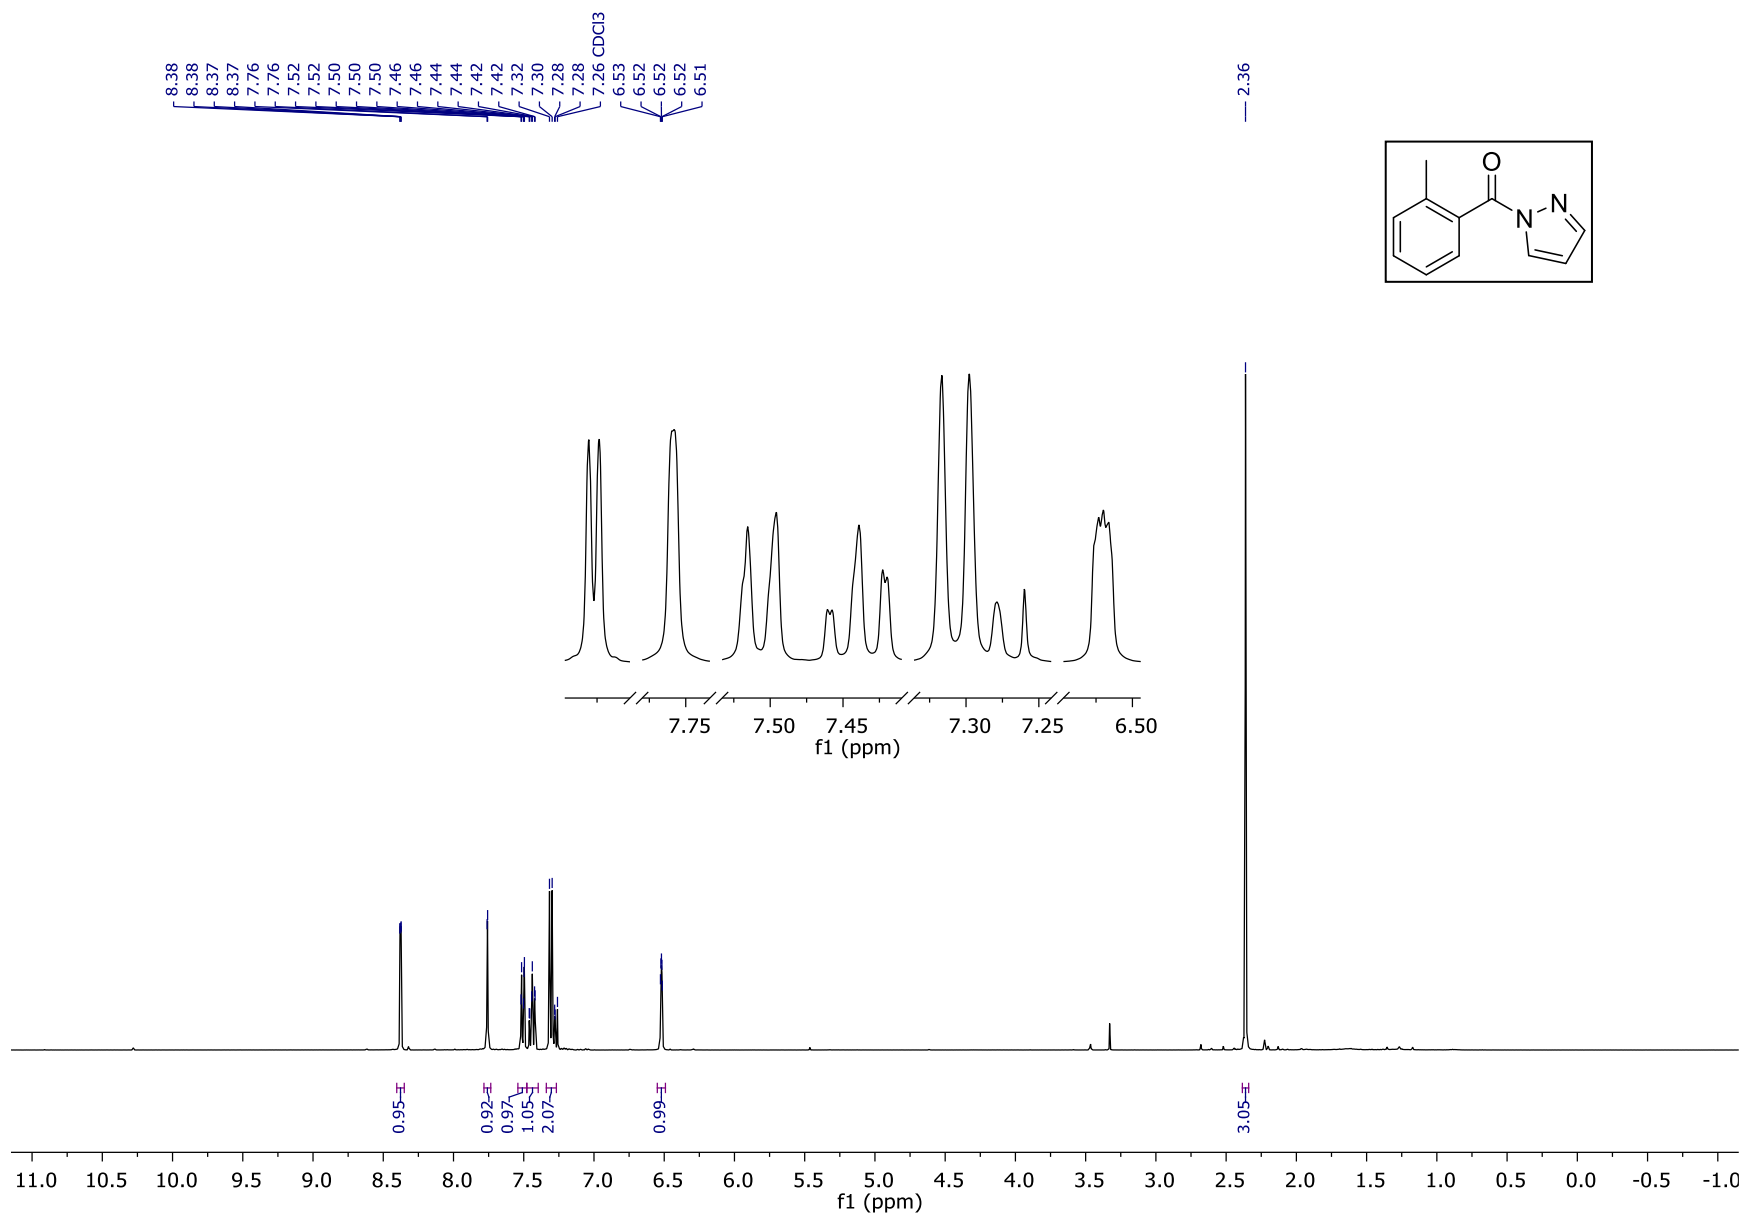



**<sup>1</sup>H-NMR (400 MHz CDCl<sub>3</sub>) (2-Methoxyphenyl)(1H-pyrazol-1-yl)methanone (7p)**

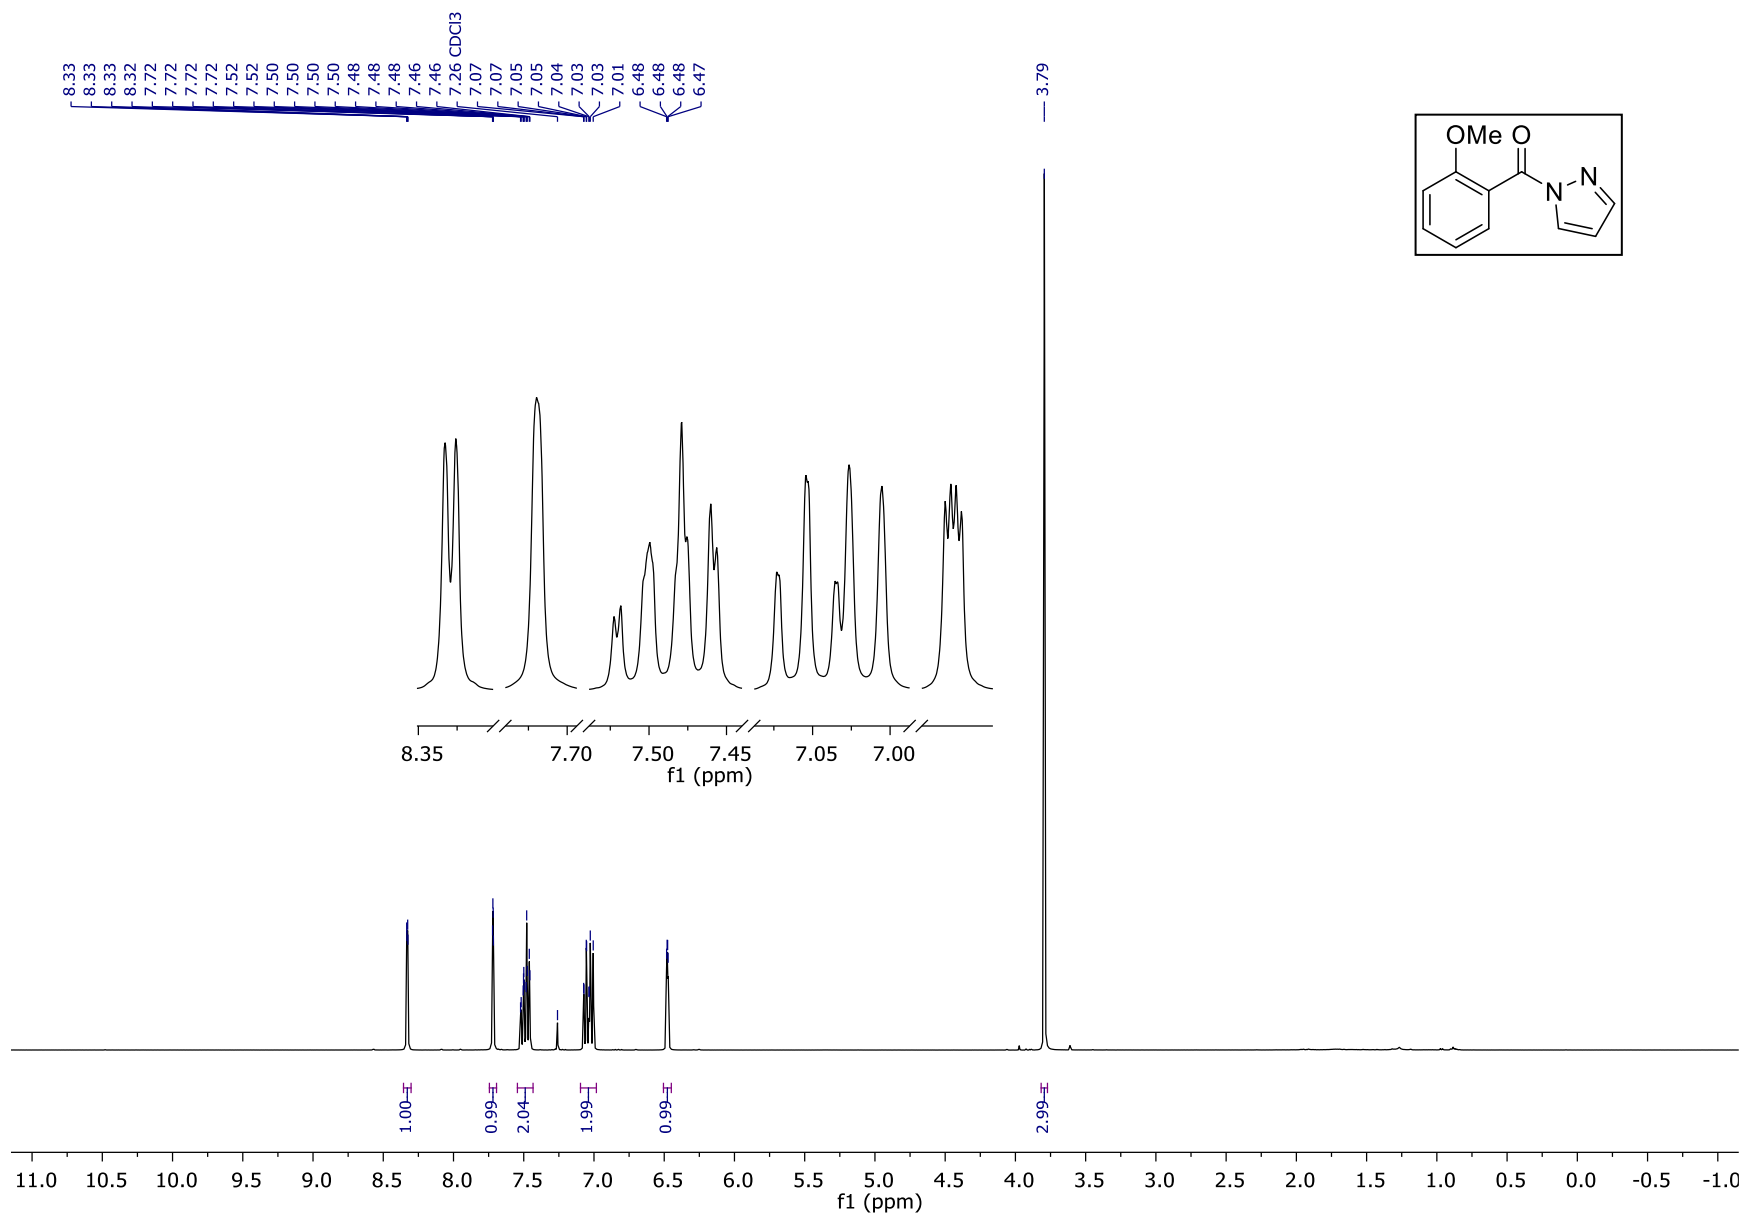

**<sup>1</sup>H-NMR (400 MHz CDCl<sub>3</sub>) (2-Bromo-4-fluorophenyl)(1H-pyrazol-1-yl)methanone (7q)**

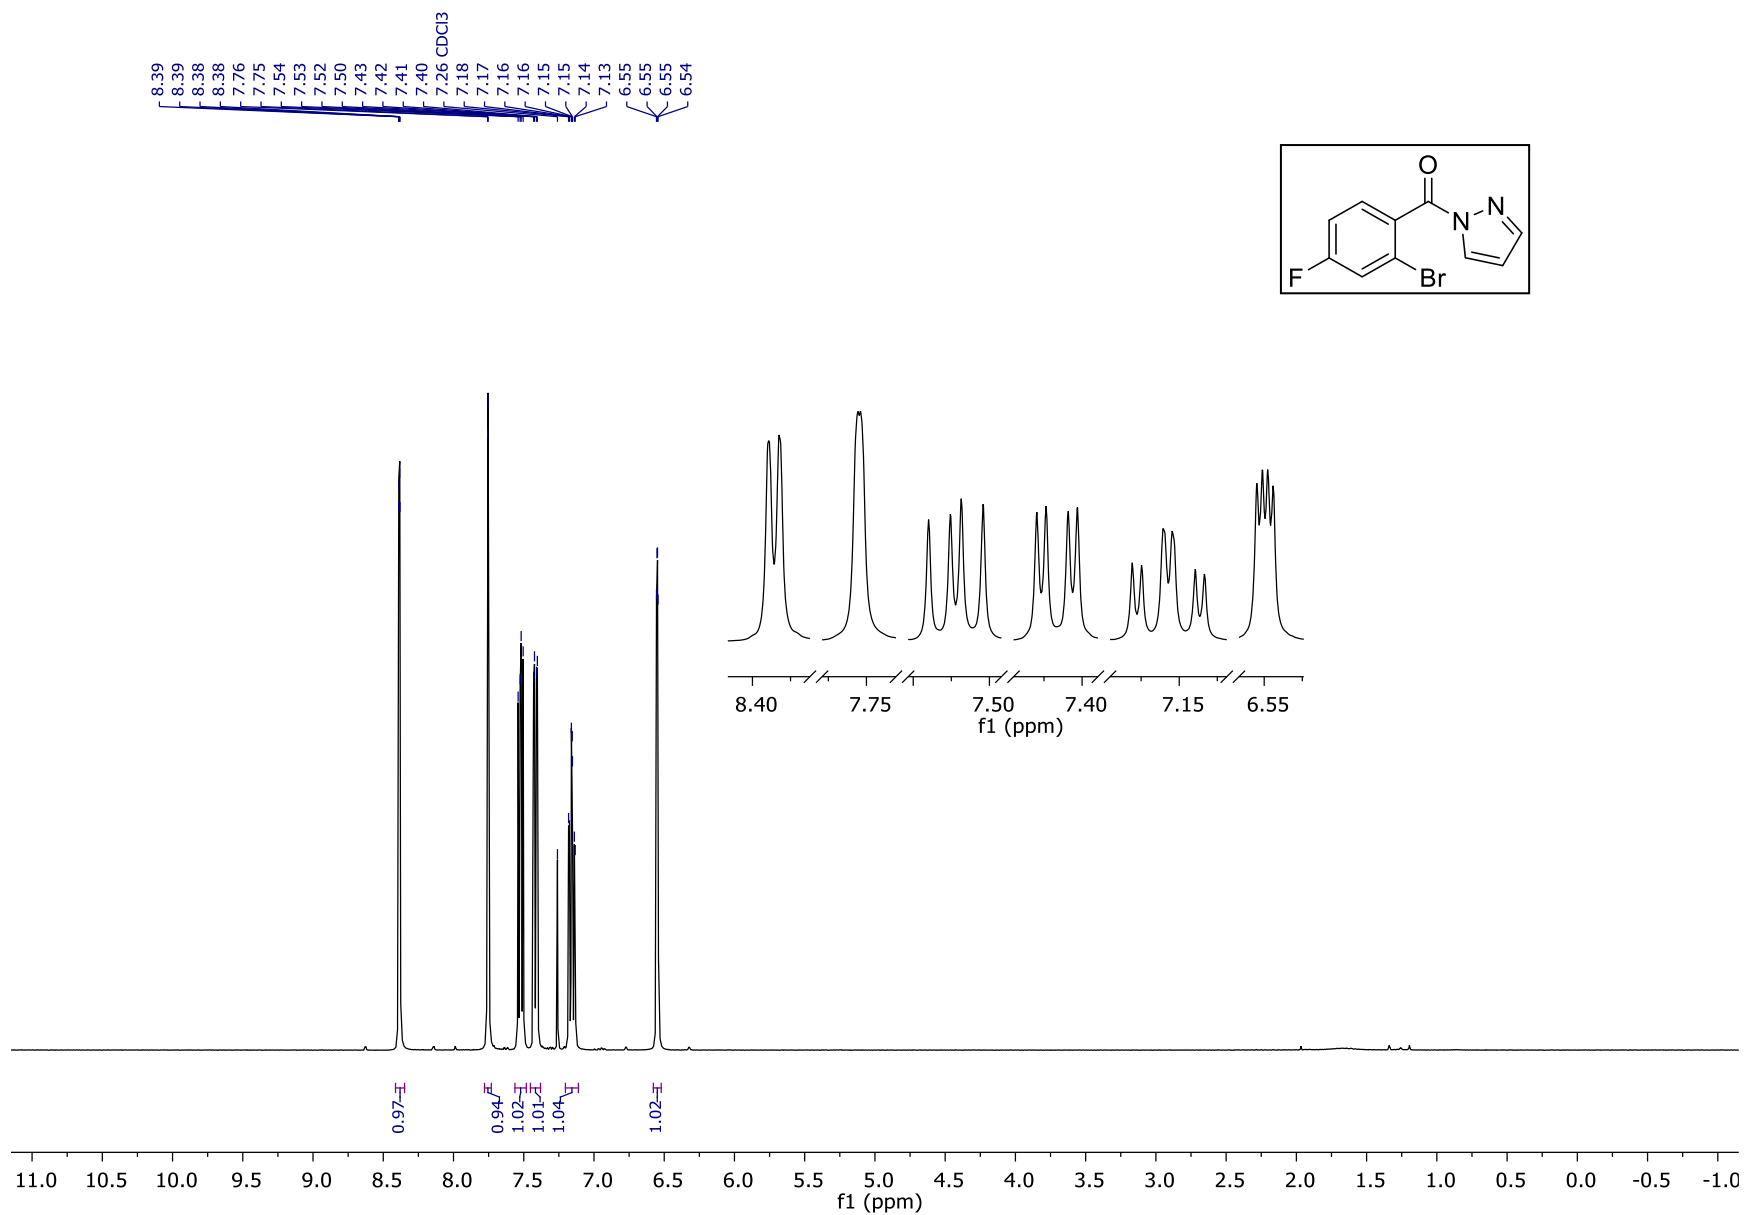

**<sup>1</sup>H-NMR (400 MHz CDCl<sub>3</sub>) Naphtalen-1-yl(1*H*-pyrazol-1-yl)methanone (7r)**

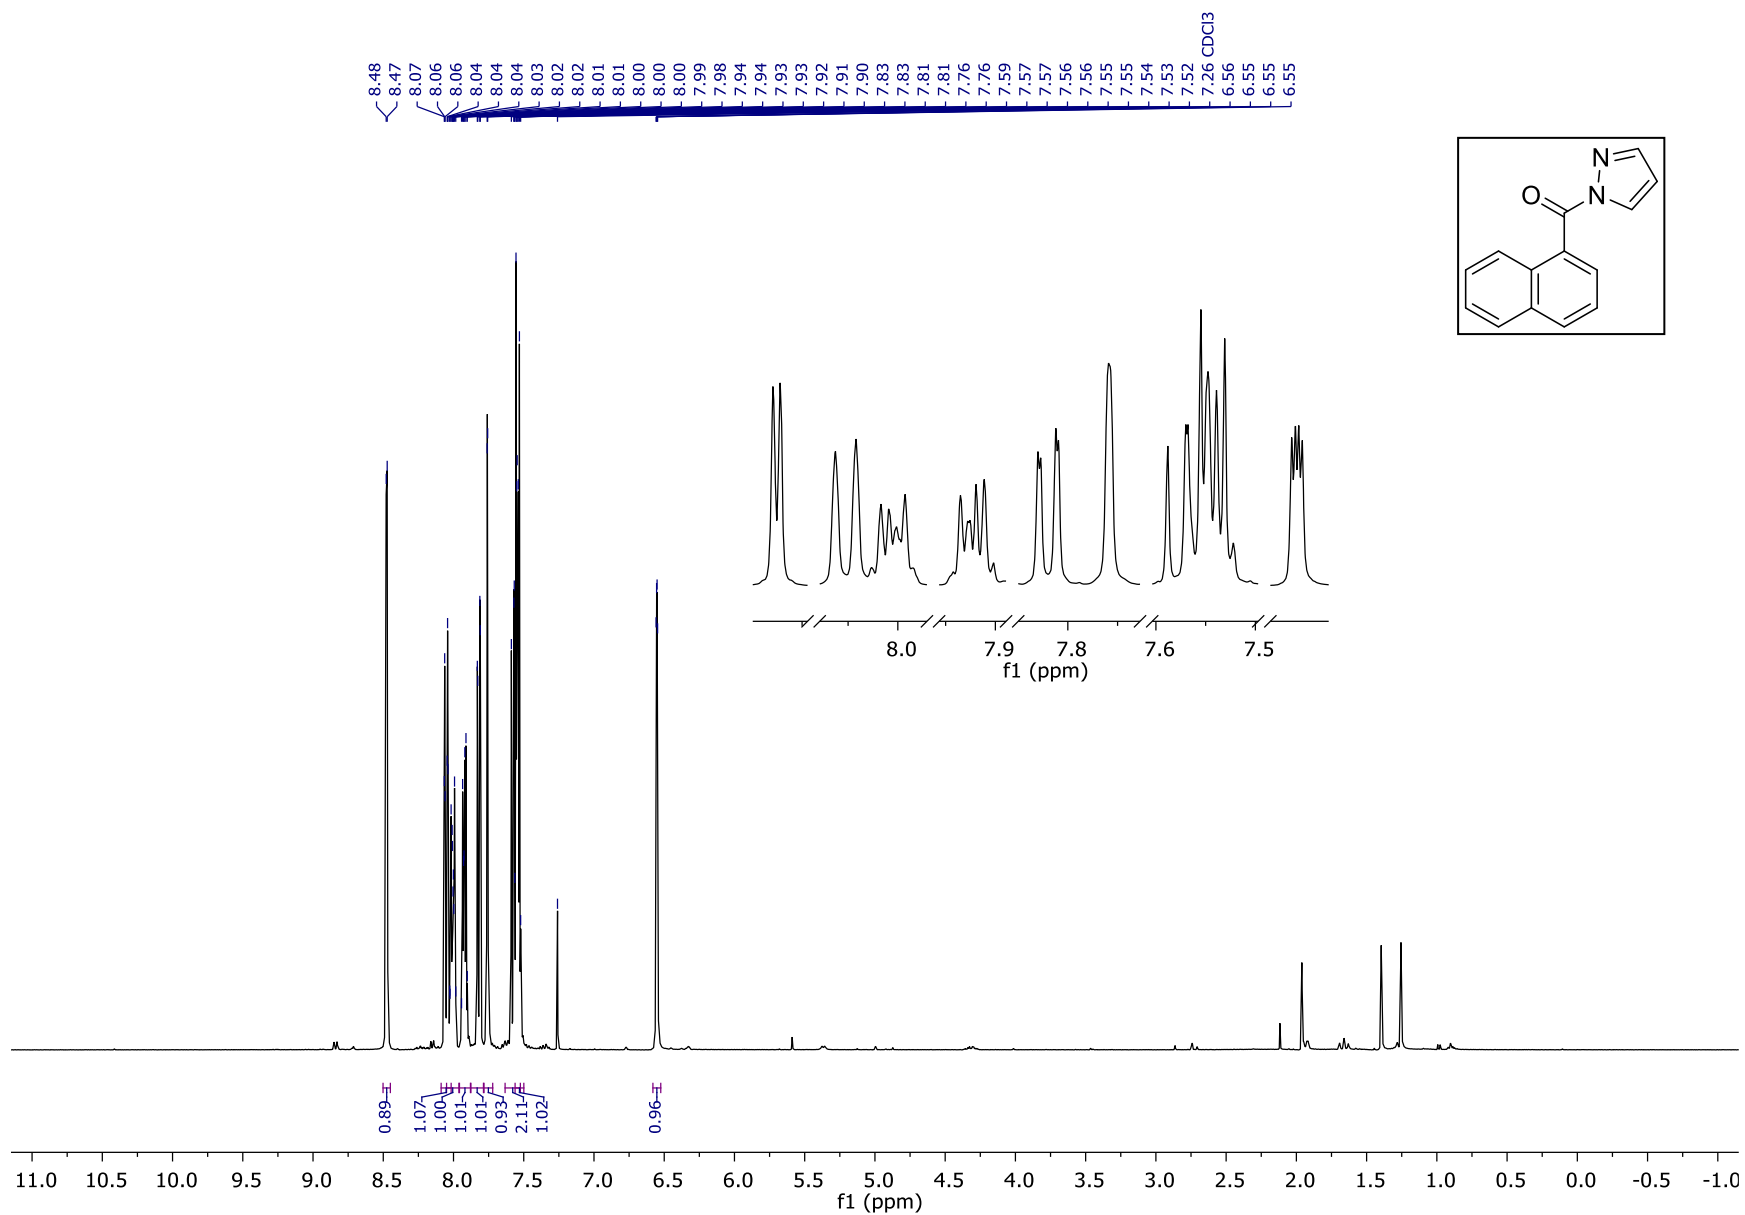

**<sup>1</sup>H-NMR (300 MHz CDCl<sub>3</sub>) (2-Chloropyridin-3-yl)(1*H*-pyrazol-1-yl)methanone (7s)**

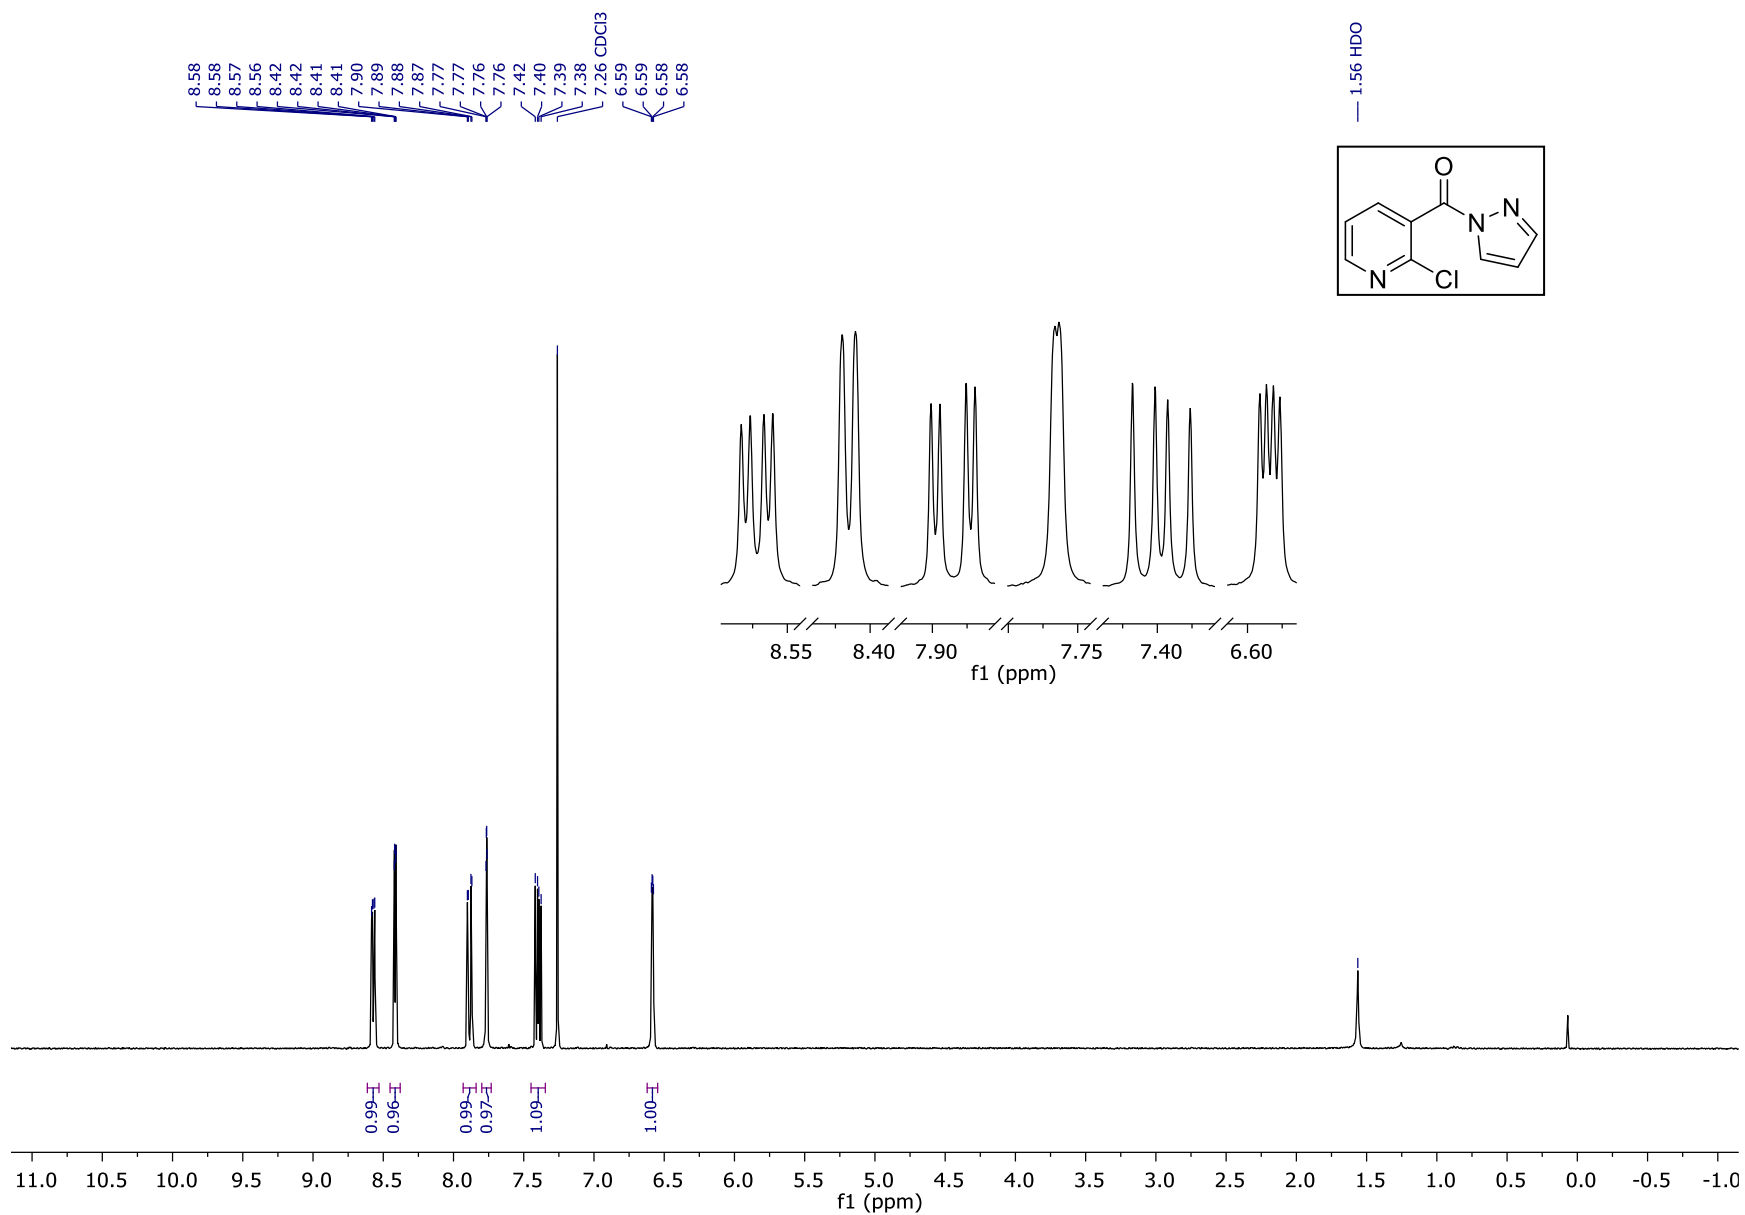

**<sup>1</sup>H-NMR (300 MHz CDCl<sub>3</sub>) (2-Chloroquinolin-3-yl)(1H-pyrazol-1-yl)methanone (7t)**

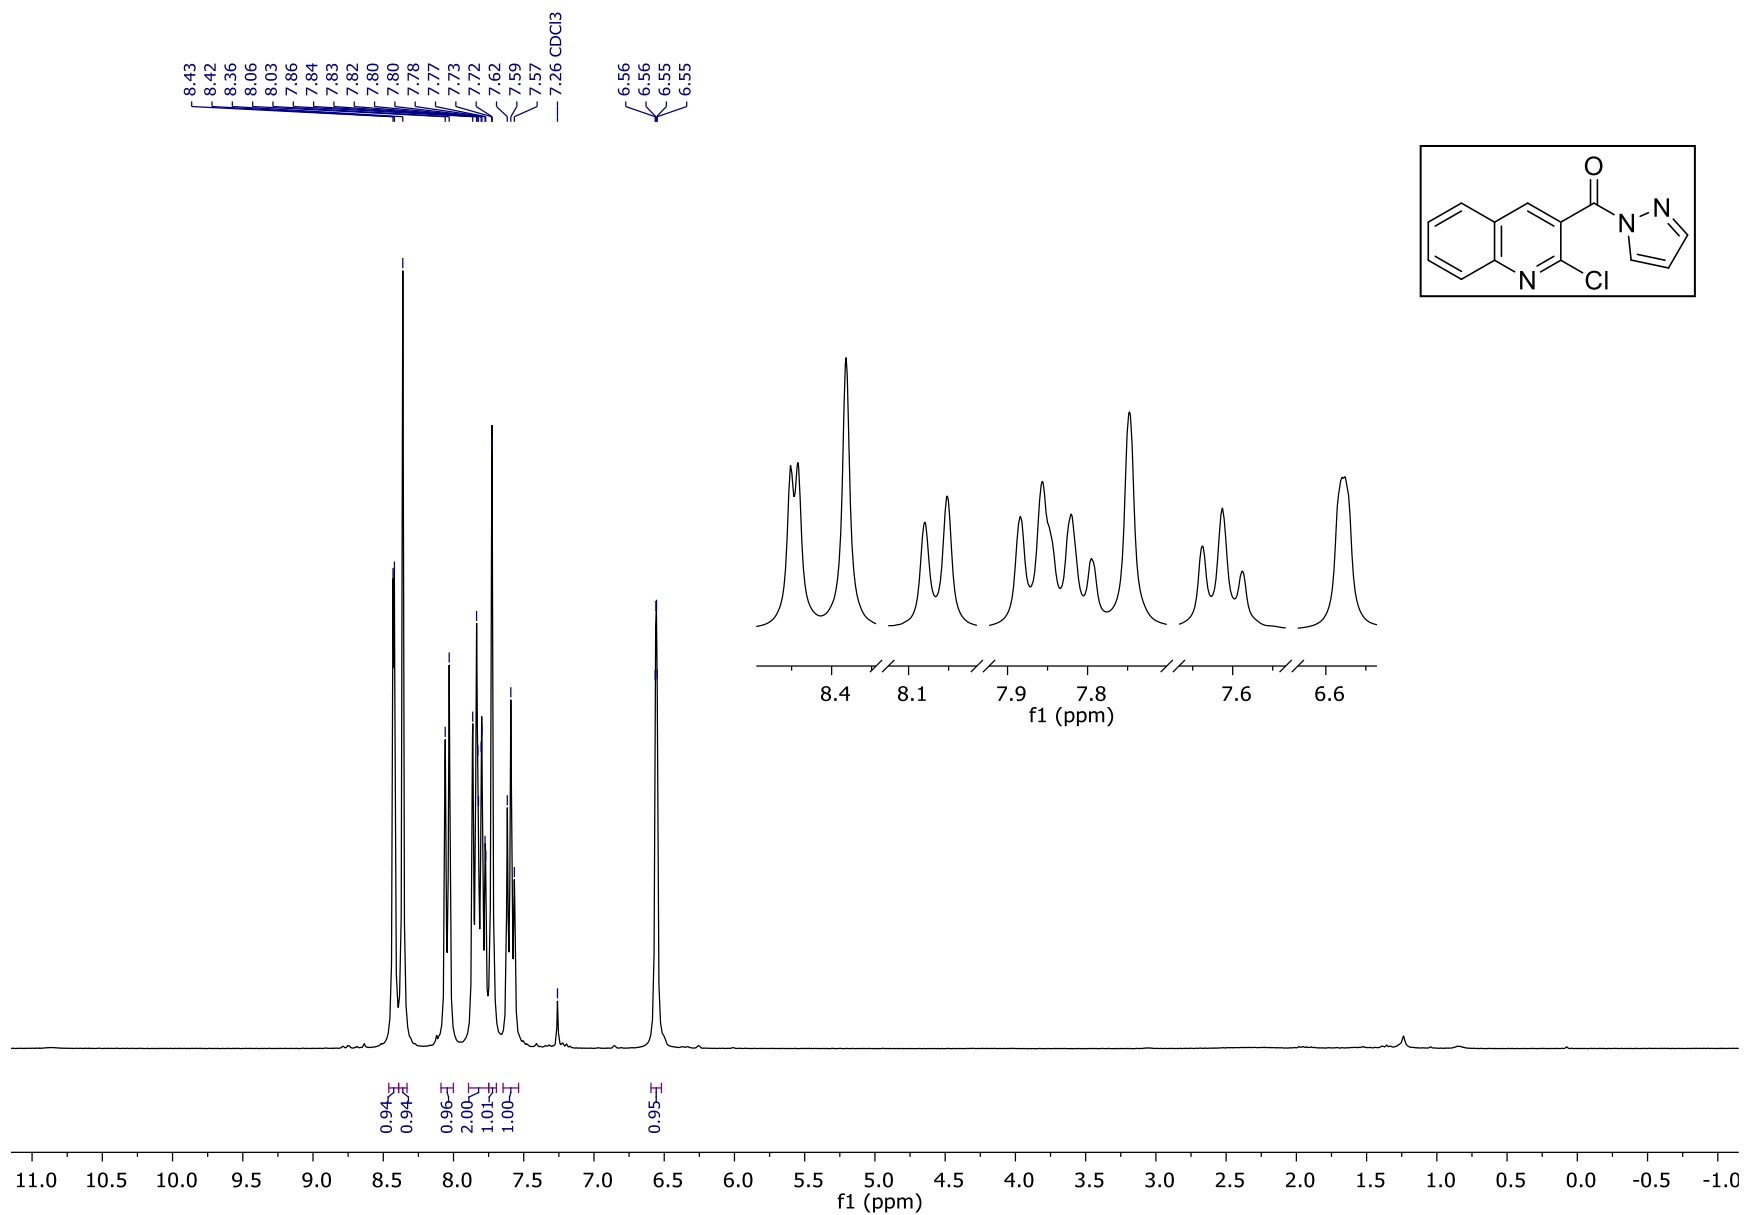

**<sup>1</sup>H-NMR (400 MHz CDCl<sub>3</sub>) (5-bromothiophen-2-yl)(1H-pyrazol-1-yl)methanone (7u)**

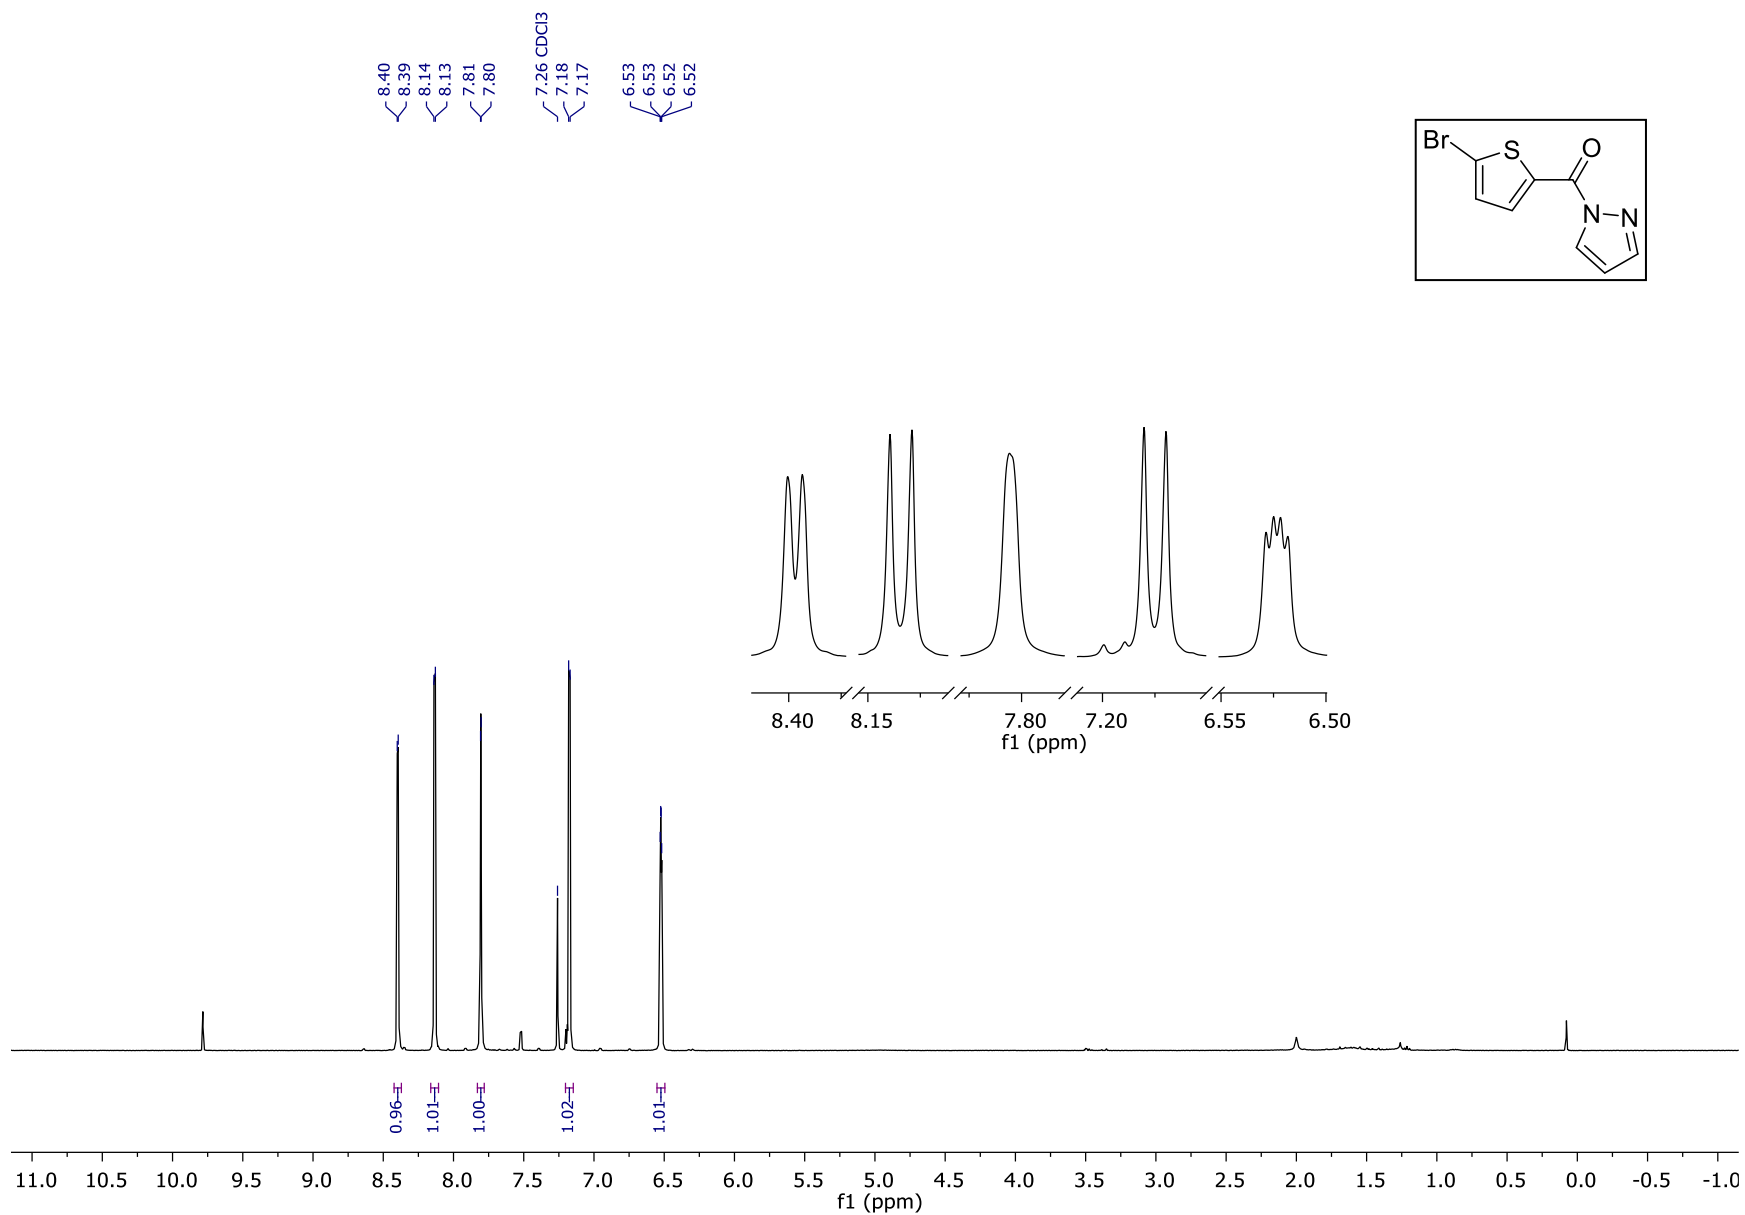

**<sup>1</sup>H-NMR (400 MHz CDCl<sub>3</sub>) (5-bromofuran-2-yl)(1H-pyrazol-1-yl)methanone (7v)**

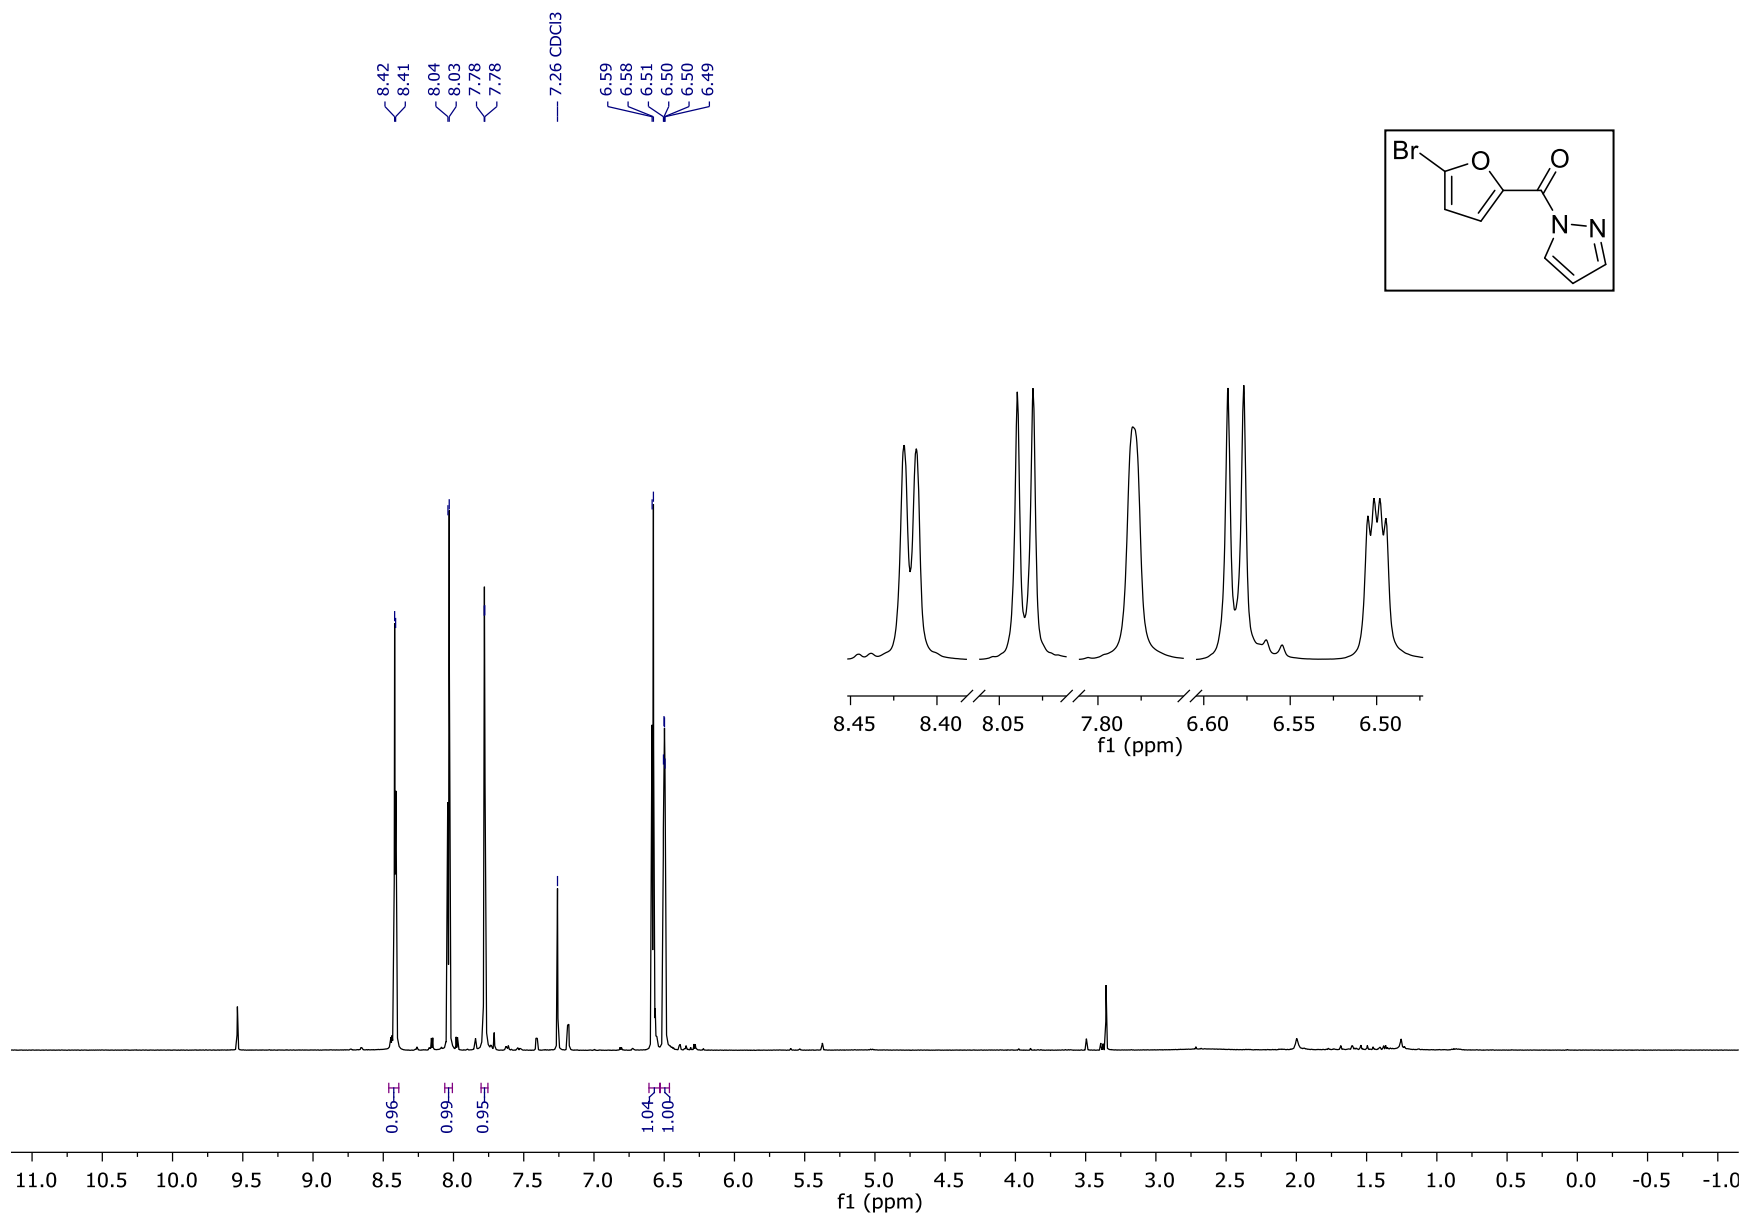

**<sup>1</sup>H-NMR (400 MHz CDCl<sub>3</sub>) Cyclohexyl(1*H*-pyrazol-1-yl)methanone (7w)**

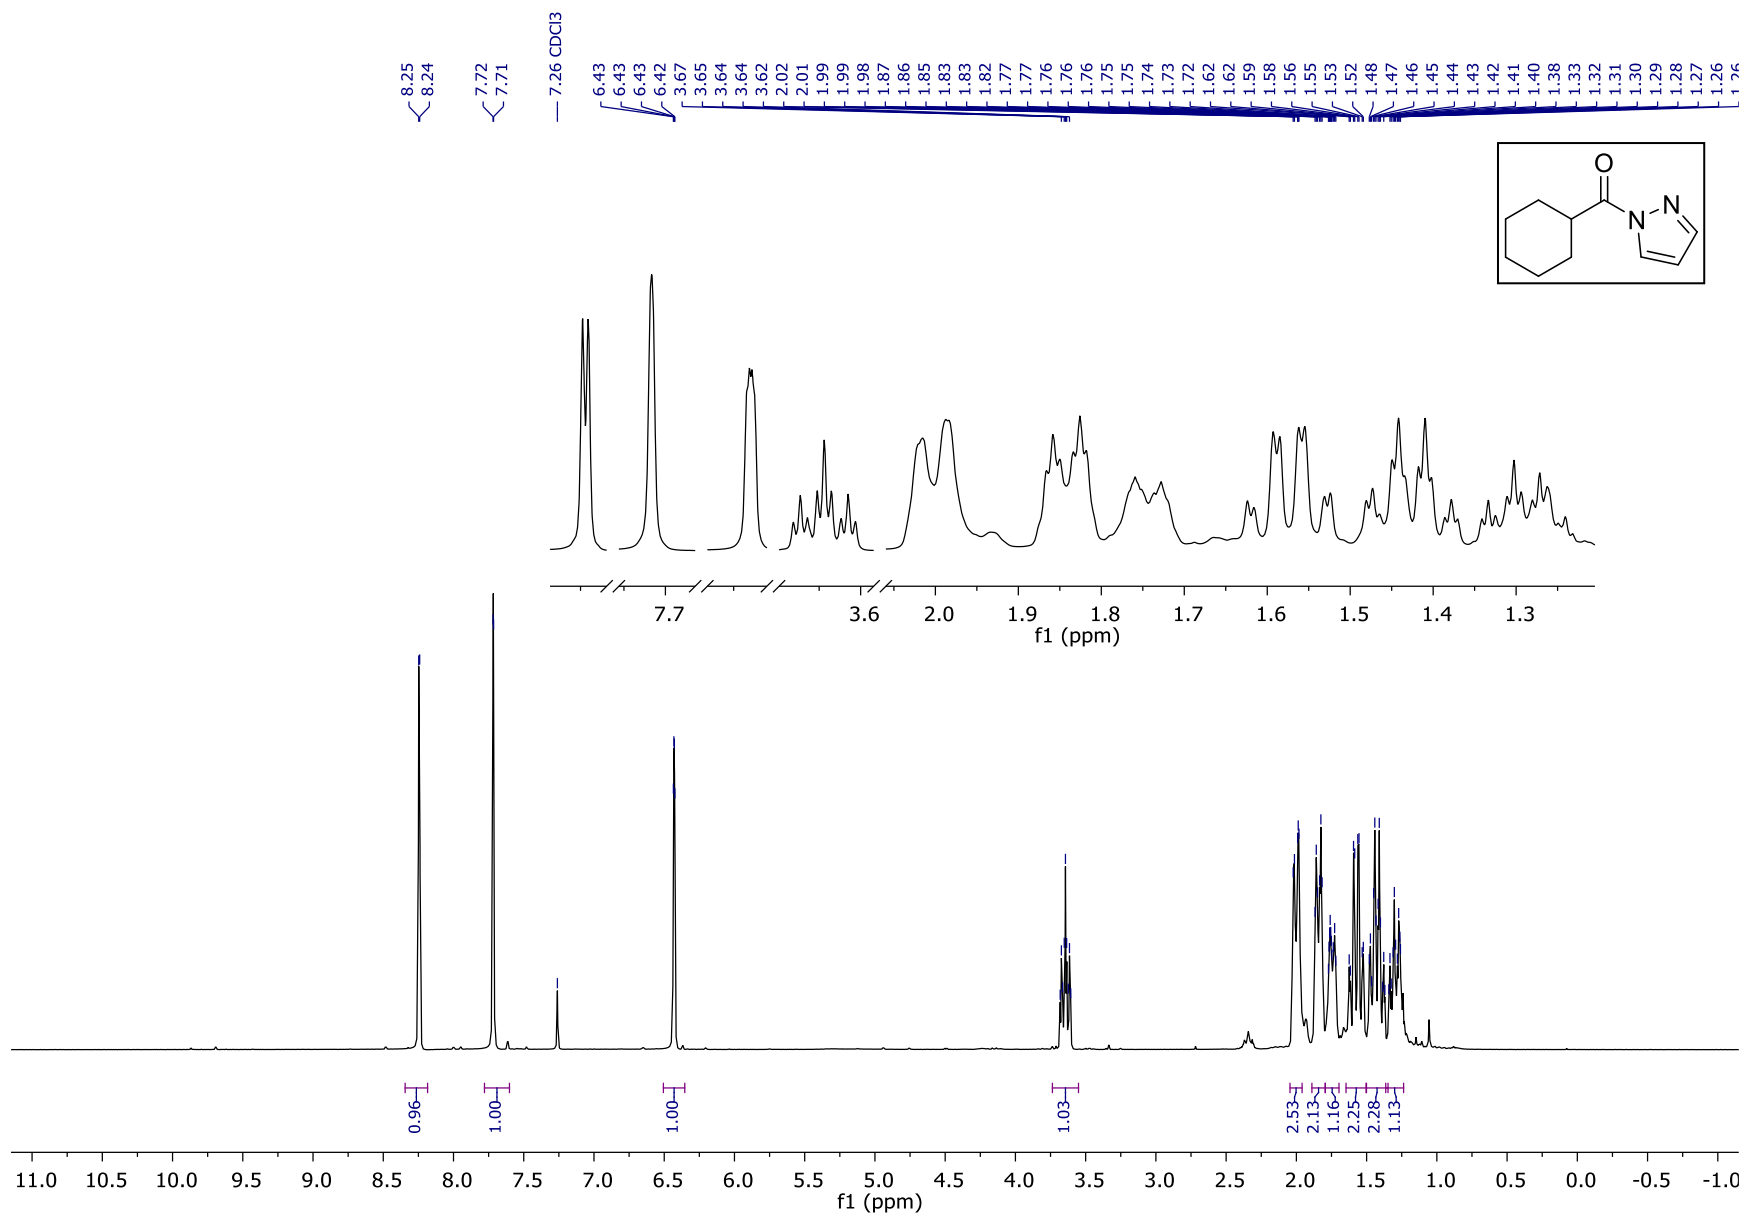



**<sup>1</sup>H-NMR (400 MHz CDCl<sub>3</sub>) 3-phenyl-1-(1H-pyrazol-1-yl)prop-2-yn-1-one (7z)**

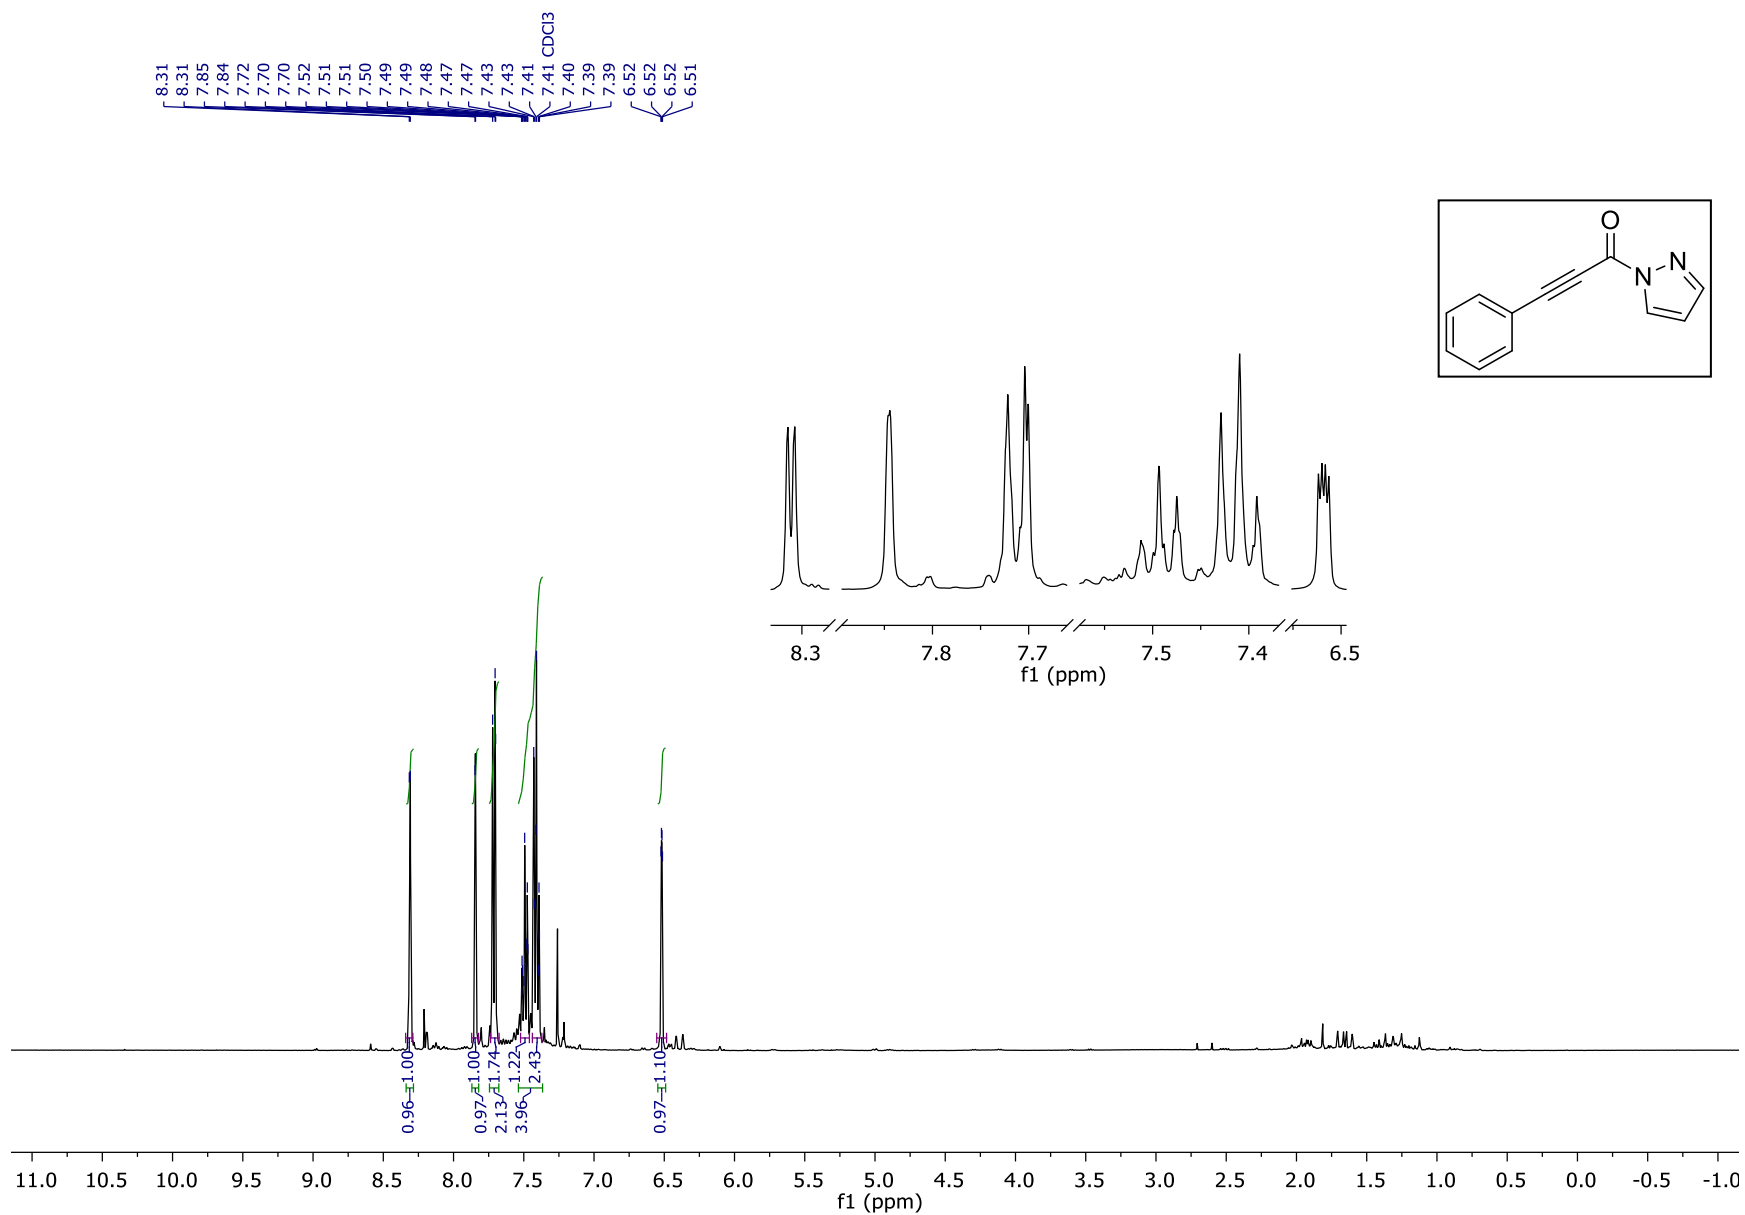

<sup>1</sup>H-NMR (300 MHz CDCl<sub>3</sub>) *p*-Tolyl(2*H*-1,2,3-triazol-2-yl)methanone (7ae)

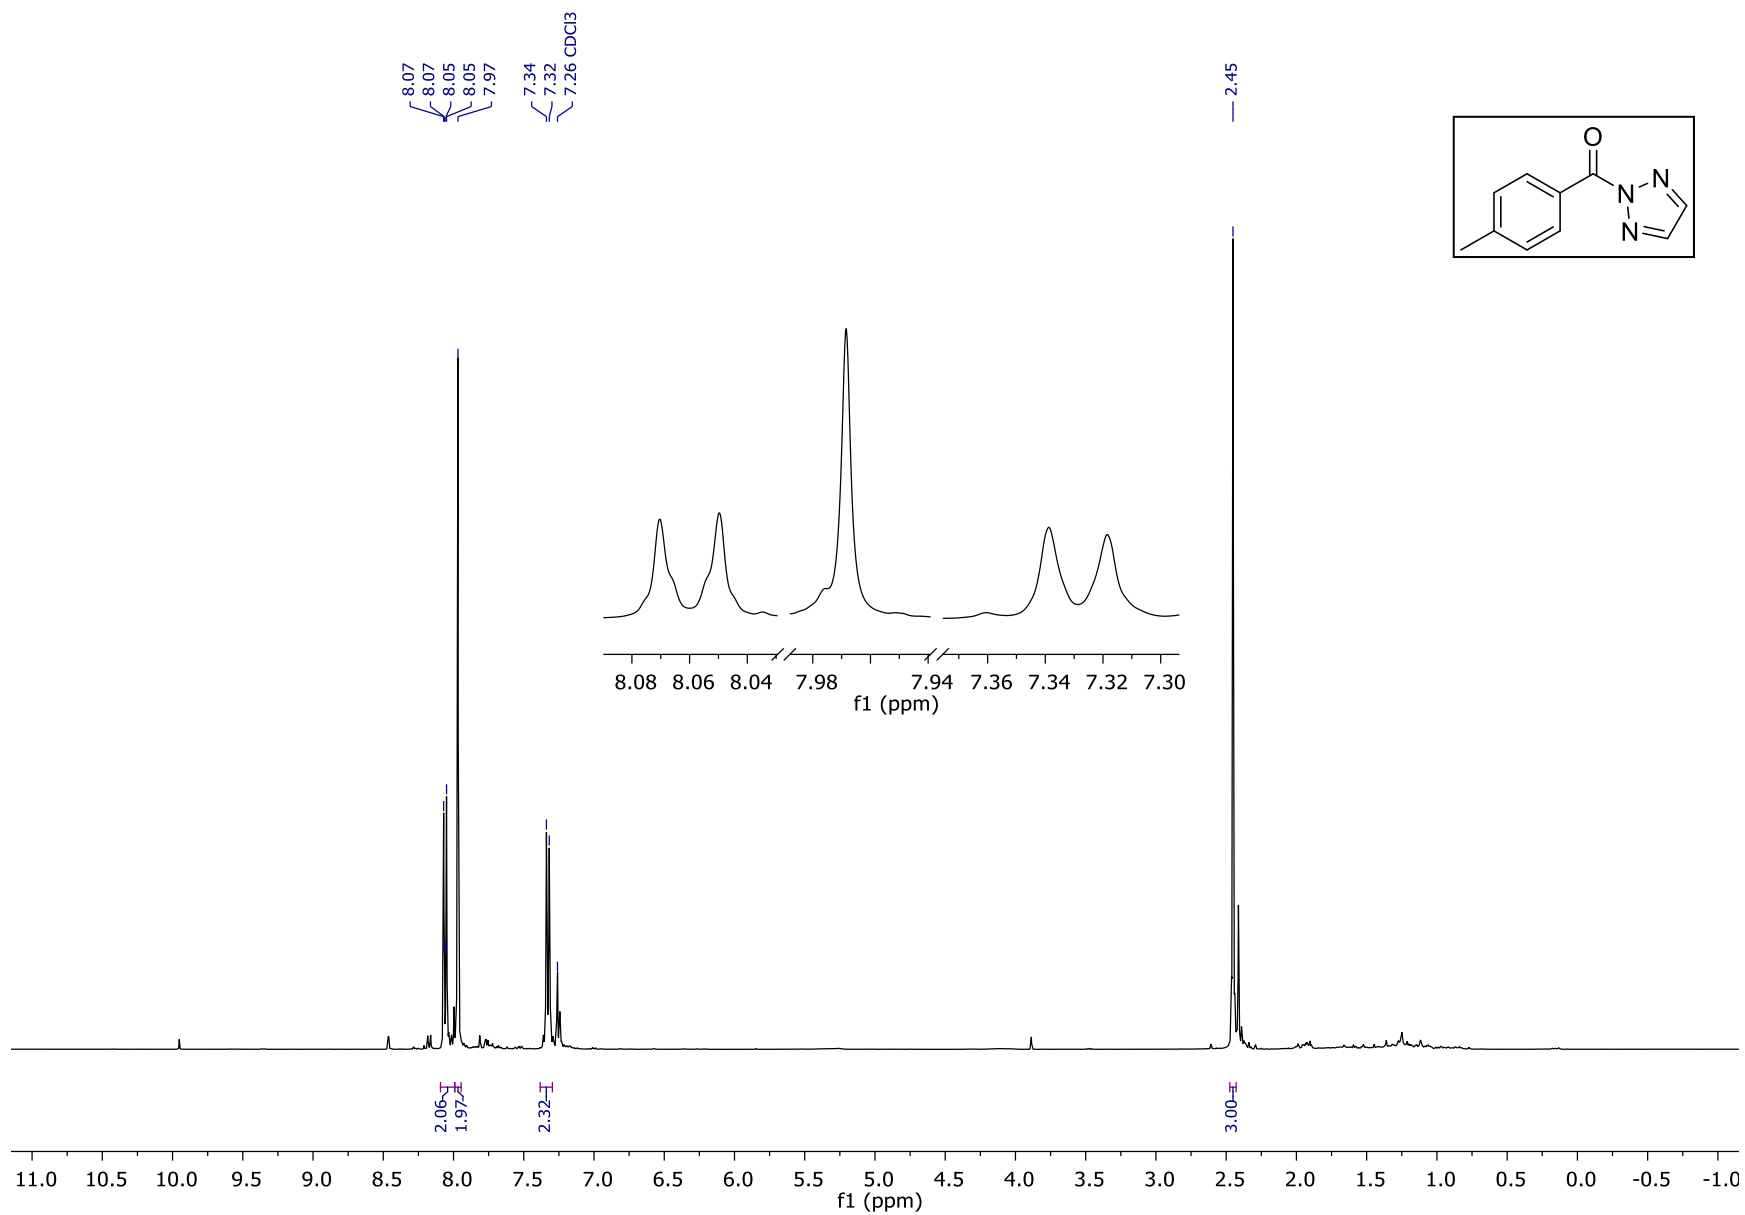

**<sup>1</sup>H-NMR (300 MHz CDCl<sub>3</sub>) 3-(1H-pyrazol-1-yl)isobenzofuran-1(3H)-one (7ai)**

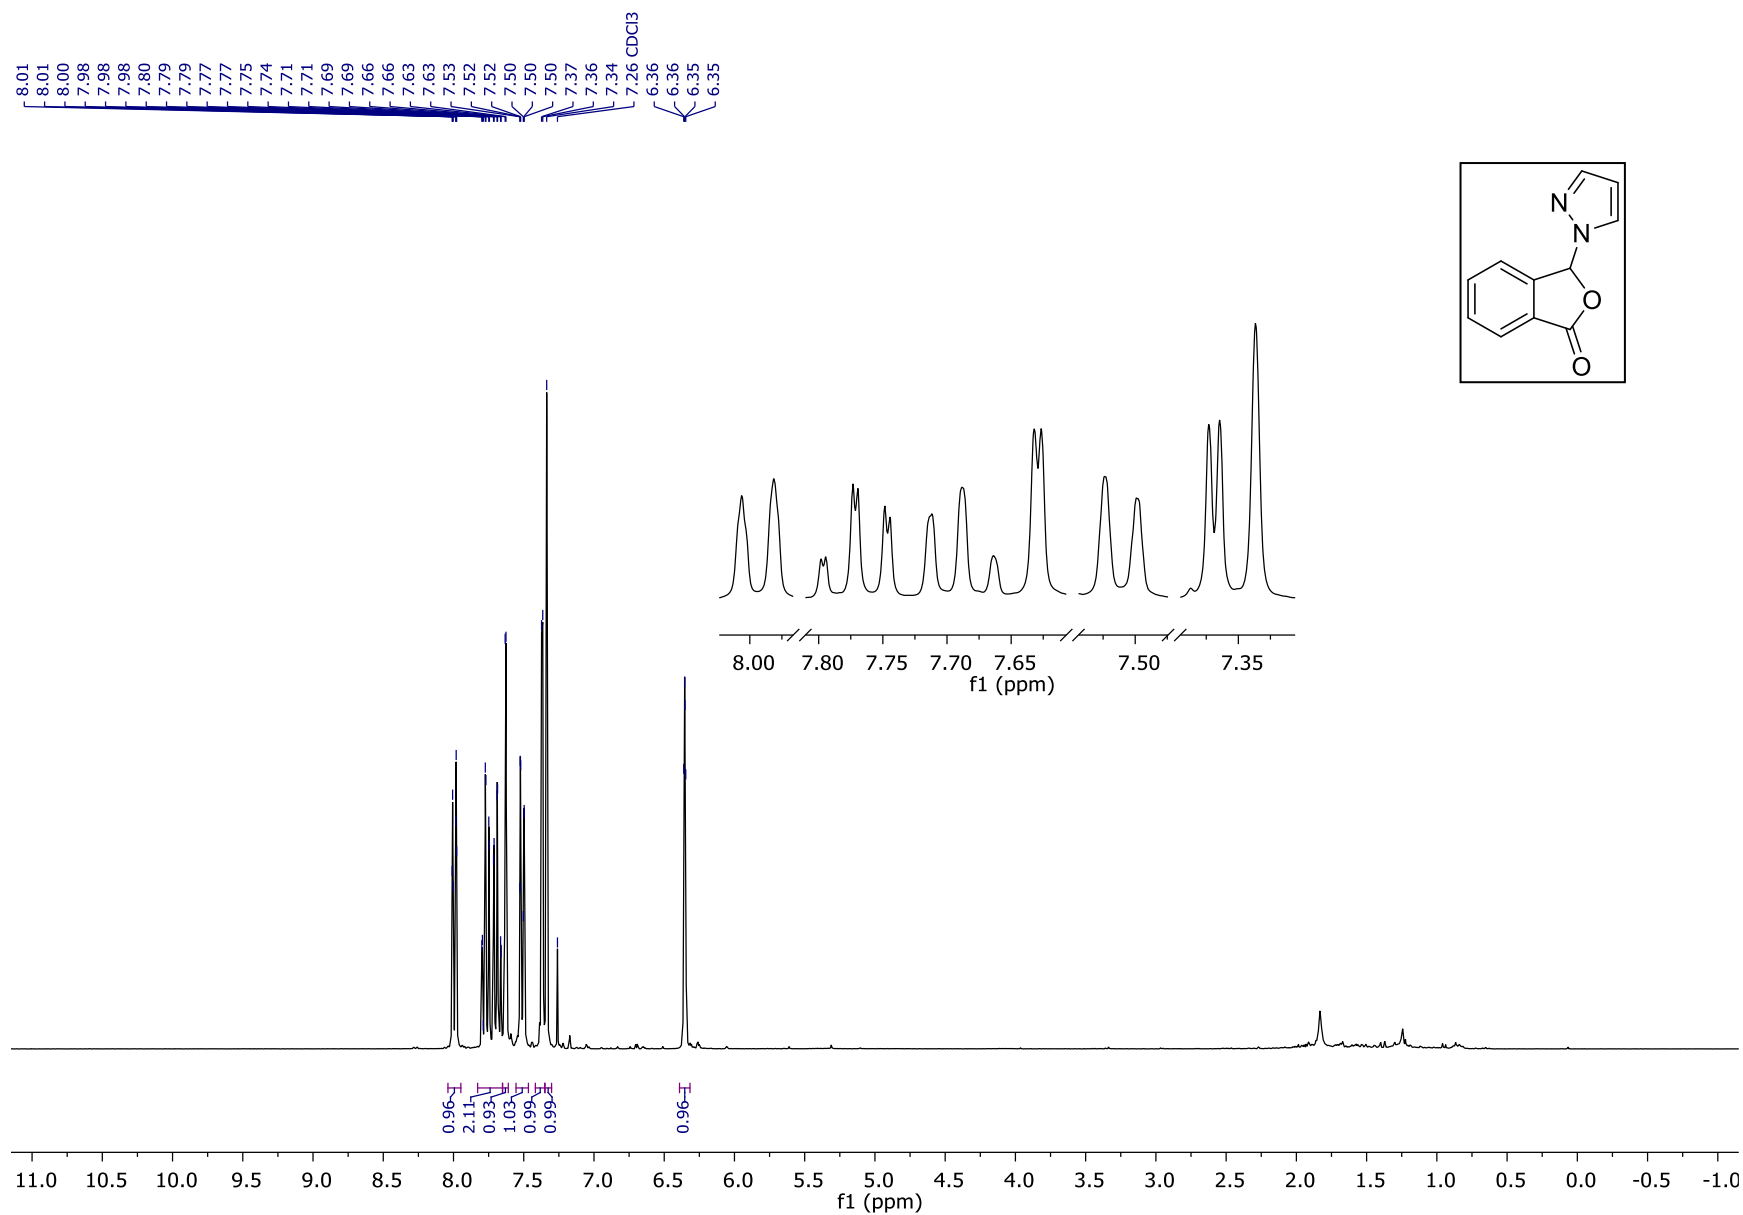

**<sup>1</sup>H-NMR (400 MHz CDCl<sub>3</sub>) 1,4-phenylenebis((1*H*-pyrazol-1-yl)methanone) (7aj)**

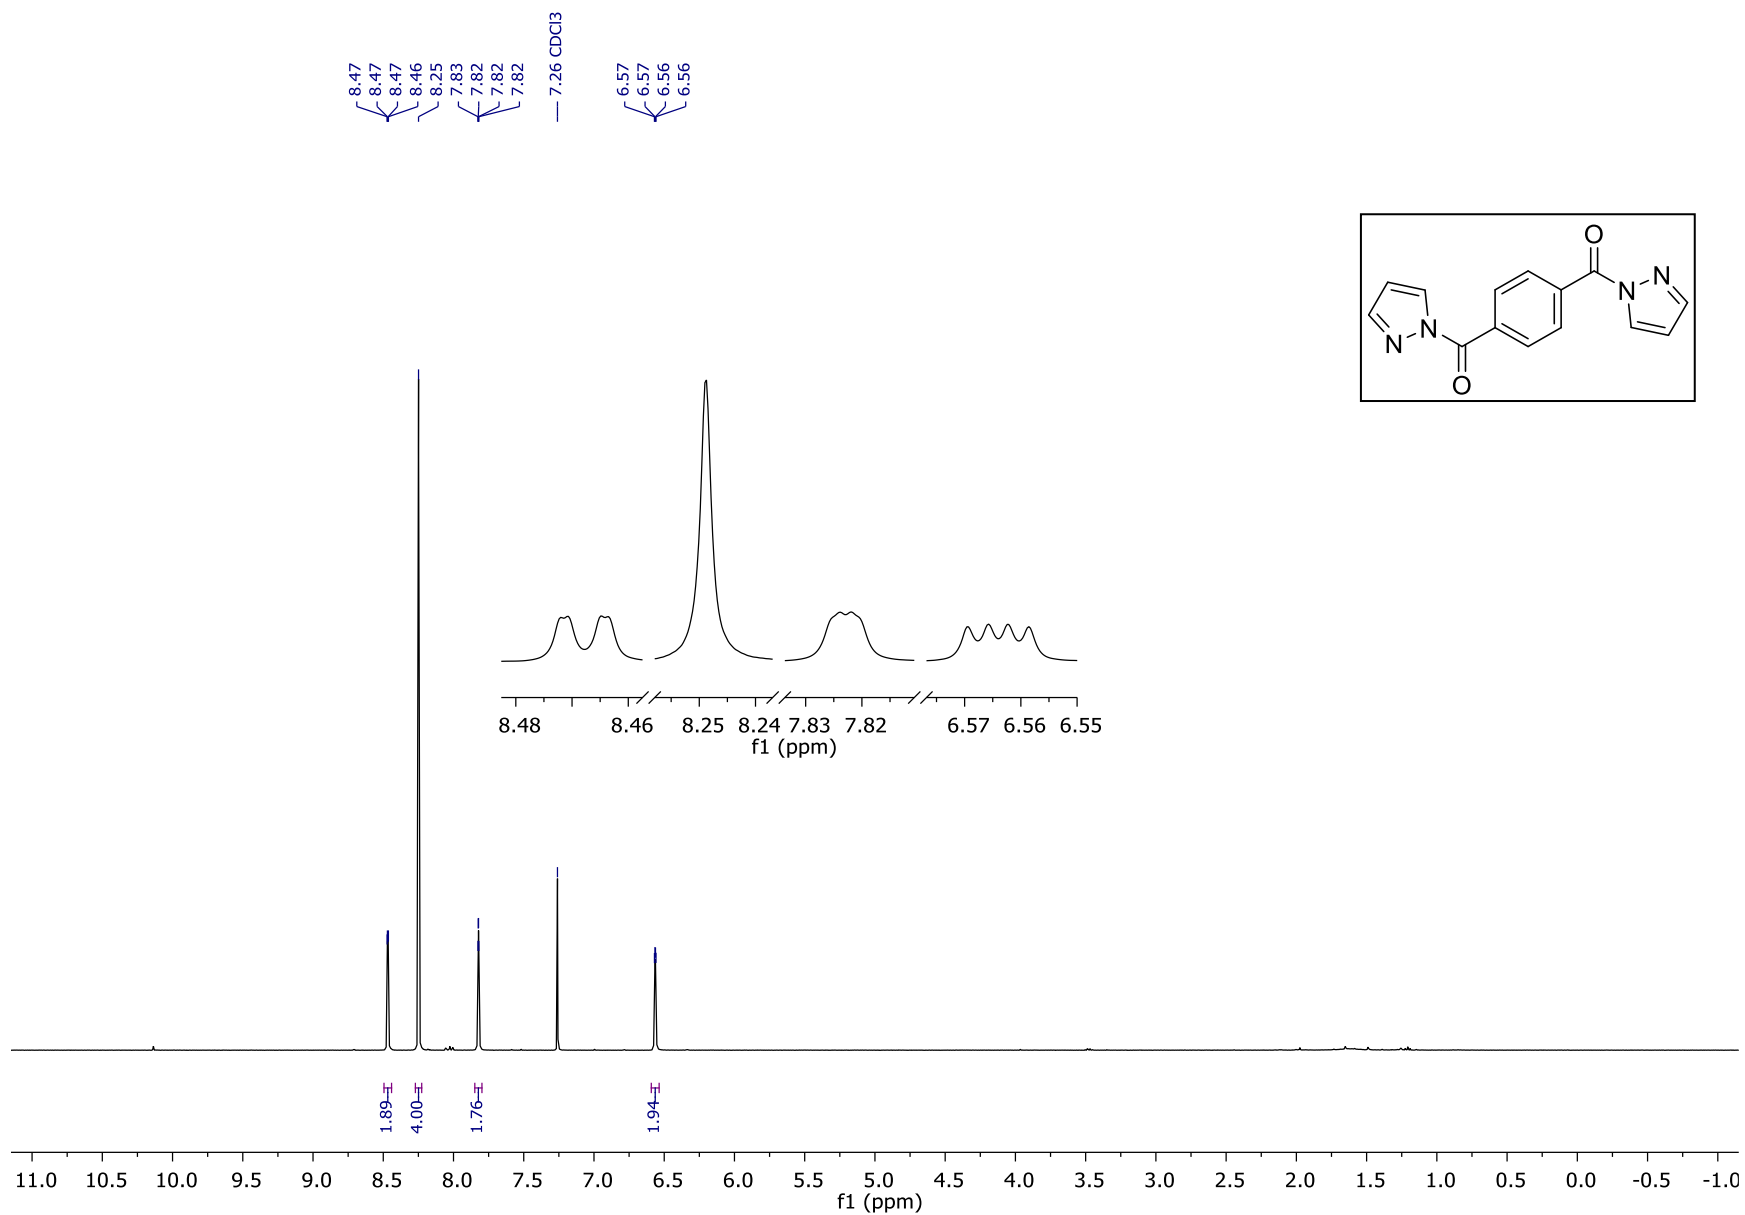

<sup>13</sup>C-NMR (75 MHz CDCl<sub>3</sub>) (1*H*-Pyrazol-1-yl)(*p*-tolyl)methanone (7a)

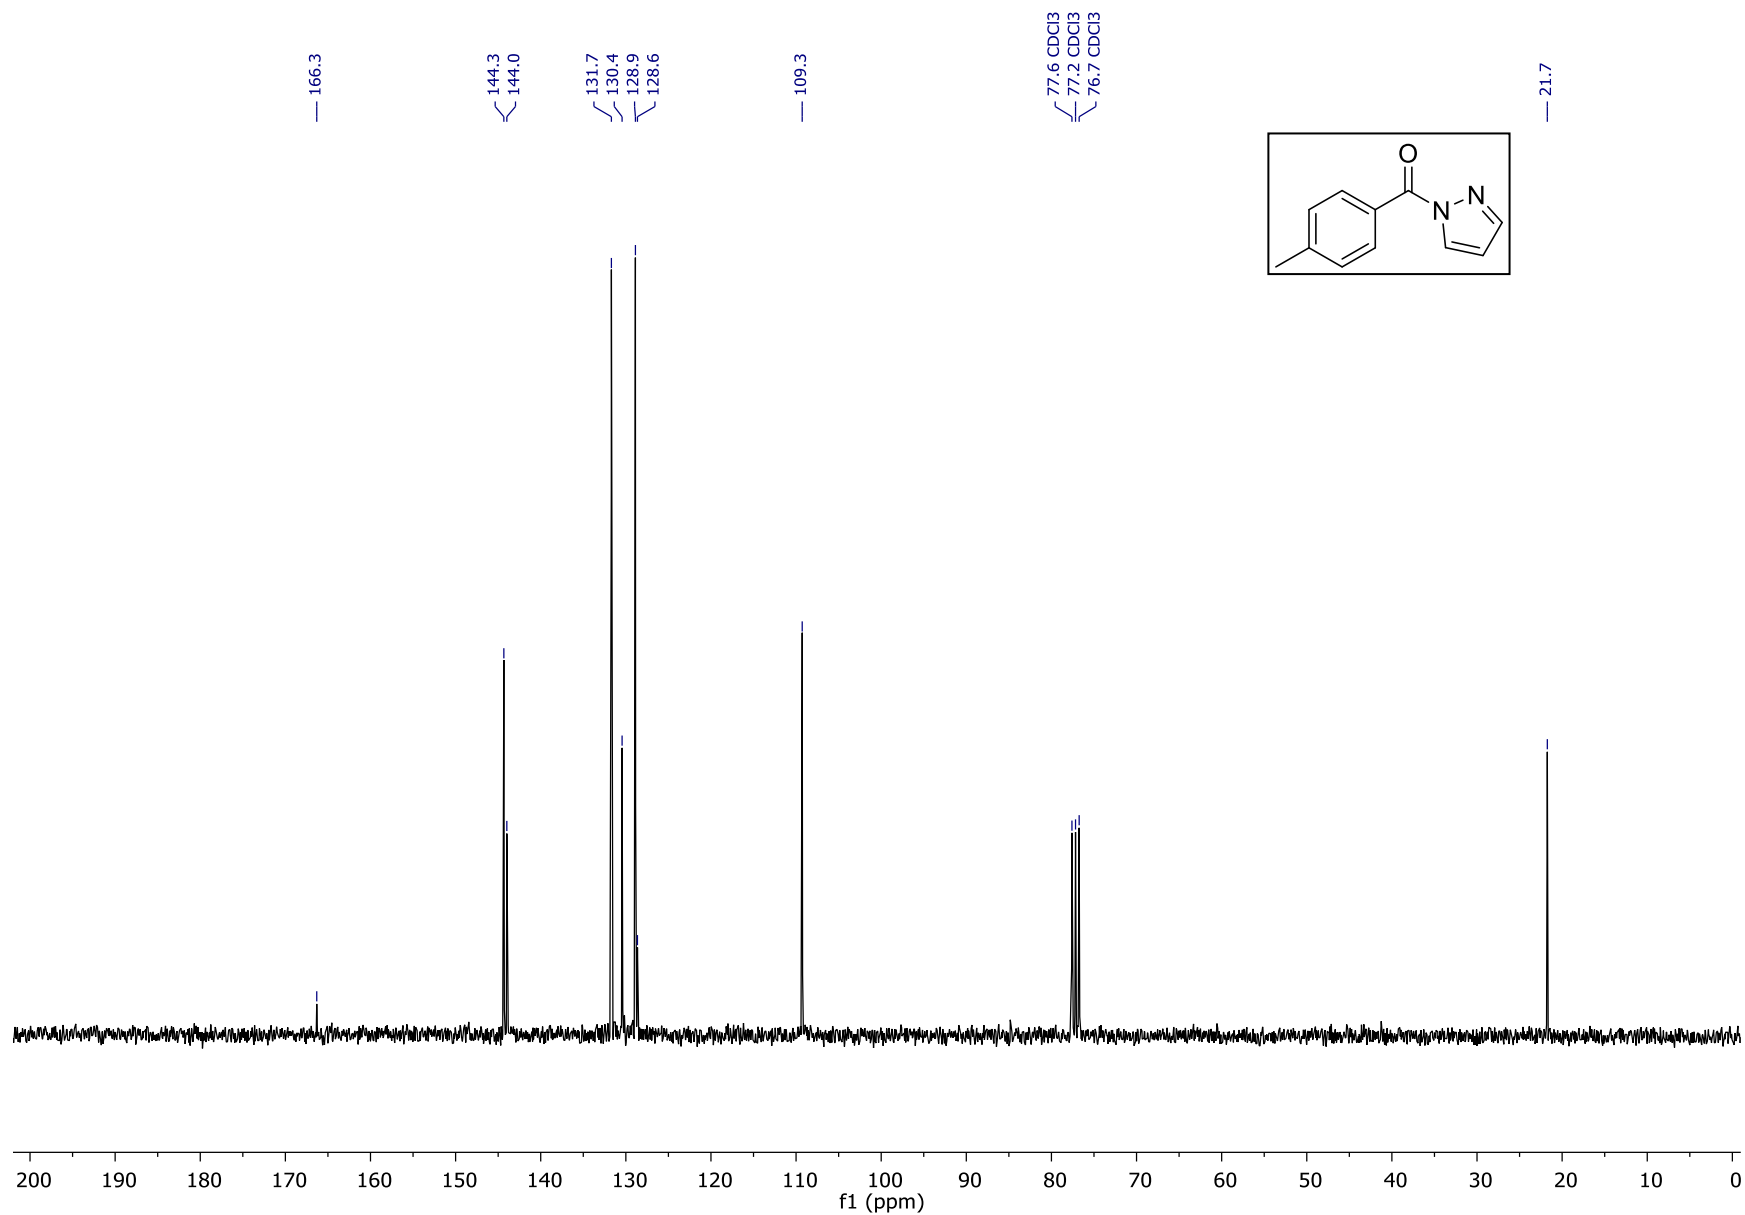

**<sup>13</sup>C-NMR (101 MHz CDCl<sub>3</sub>) (4-Fluorophenyl)(1*H*-pyrazol-1-yl)methanone (7b).**

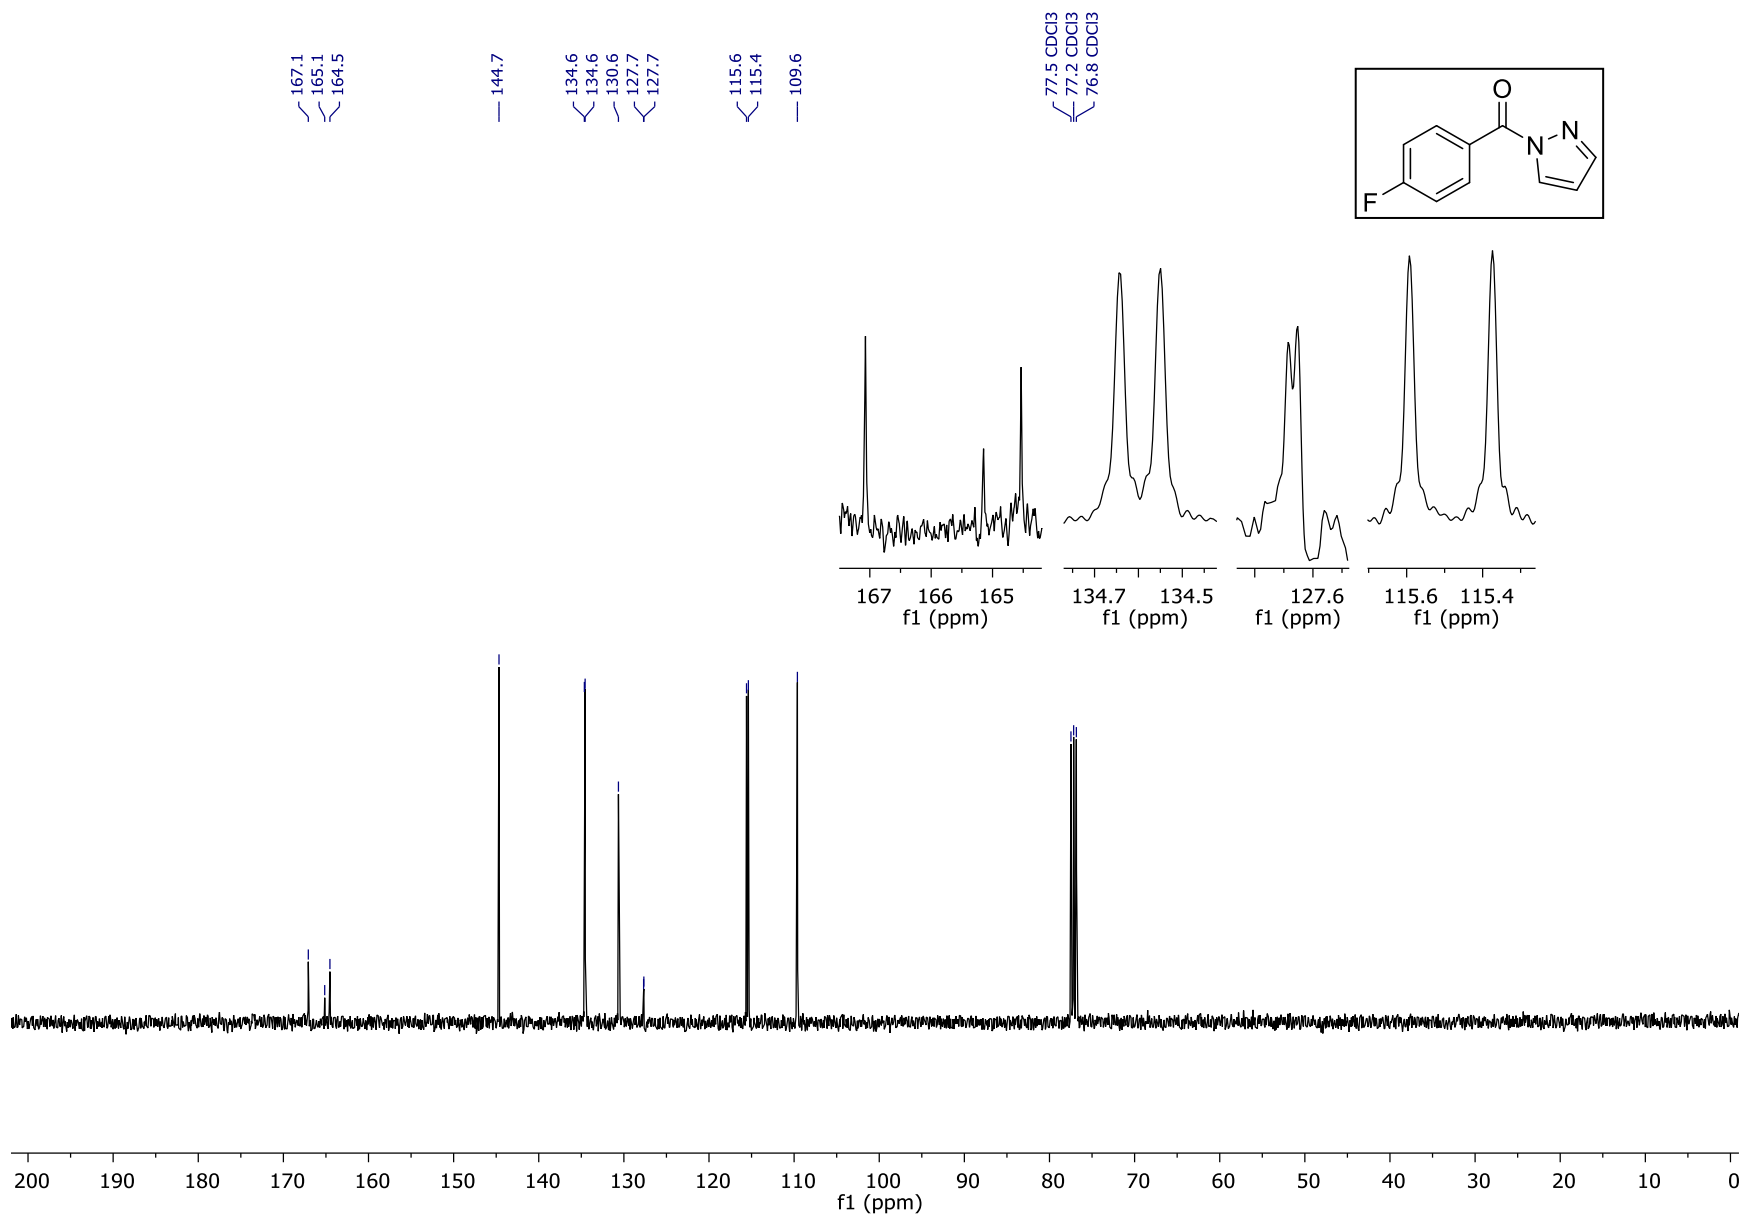

<sup>13</sup>C-NMR (101 MHz CDCl<sub>3</sub>) 4-(*tert*-Butyl)phenyl(1*H*-pyrazol-1-yl)methanone (7c)

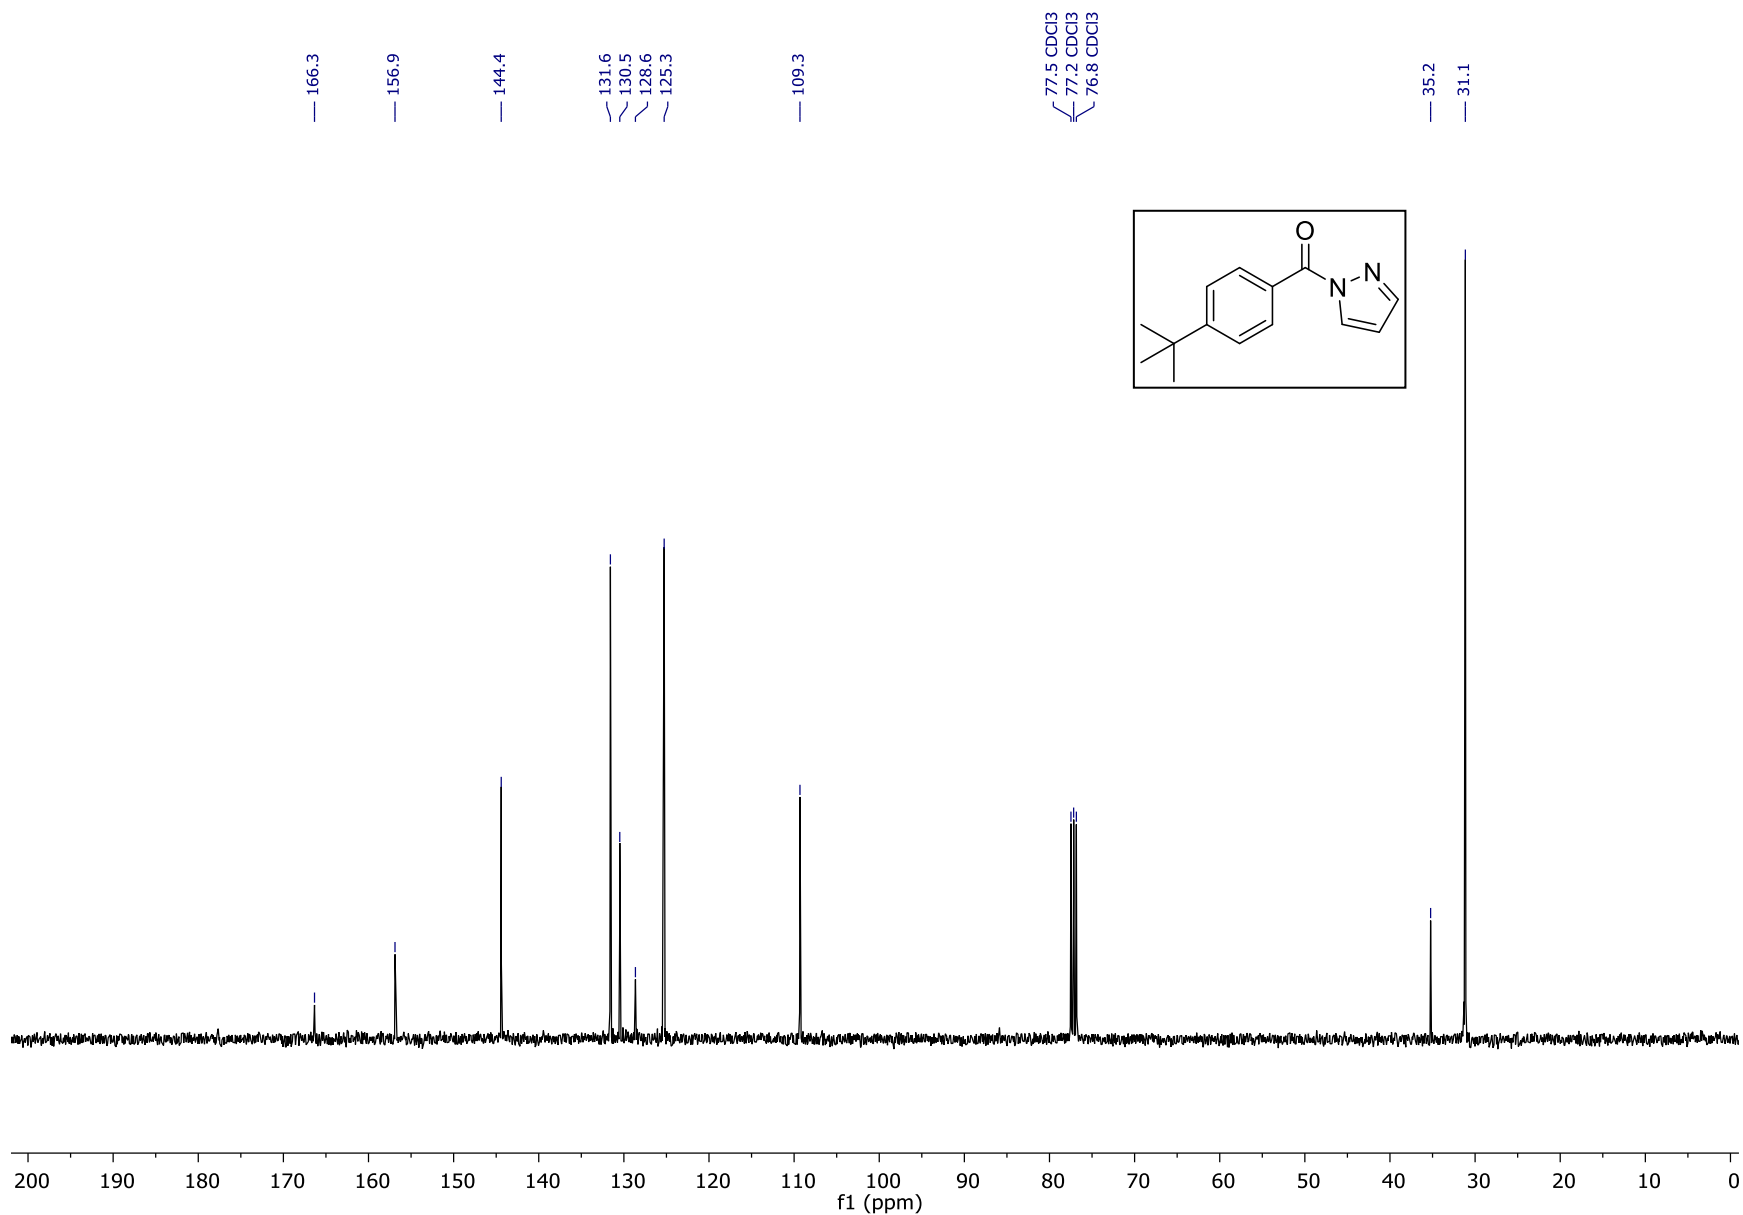

<sup>13</sup>C-NMR (101 MHz CDCl<sub>3</sub>) Phenyl(1H-pyrazol-1-yl)methanone (7d)

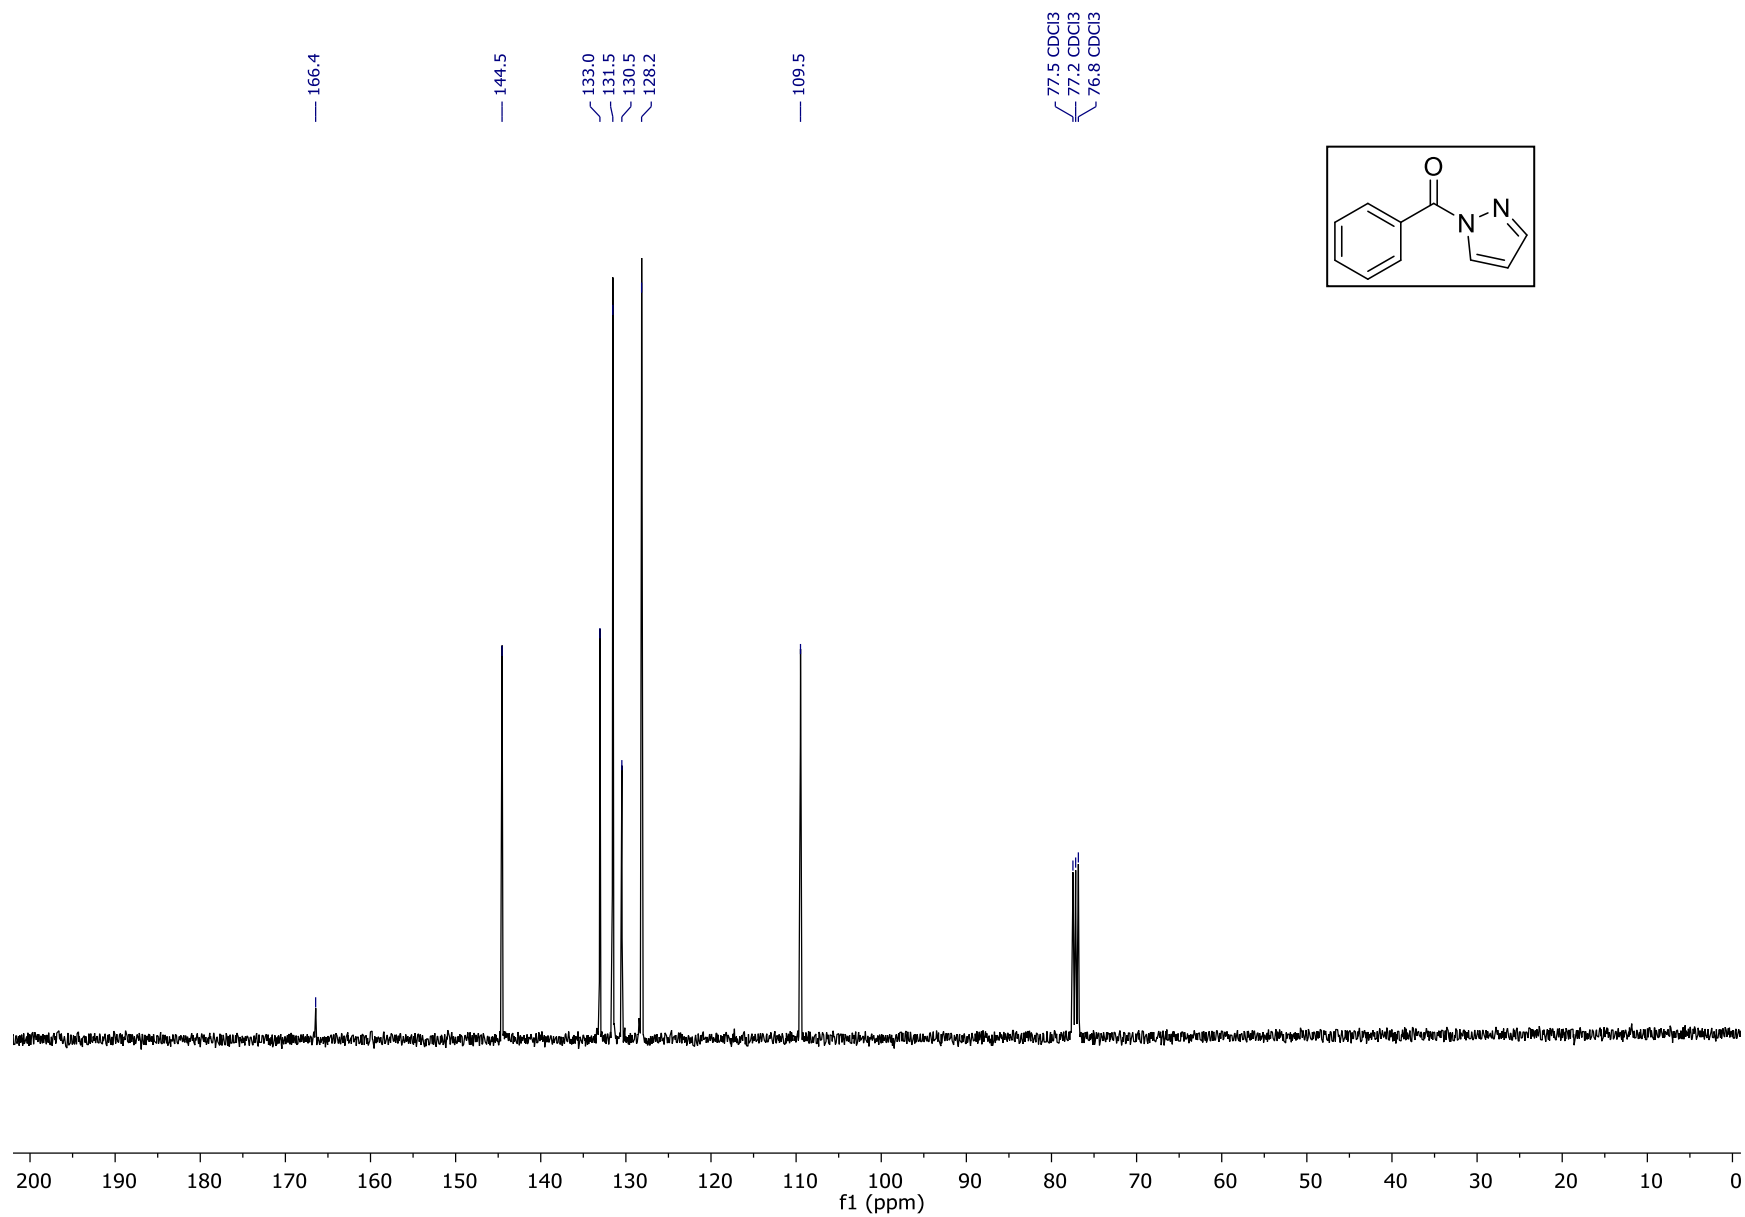



<sup>13</sup>C-NMR (101 MHz CDCl<sub>3</sub>) (4-Methoxyphenyl)(1*H*-pyrazol-1-yl)methanone (7e)

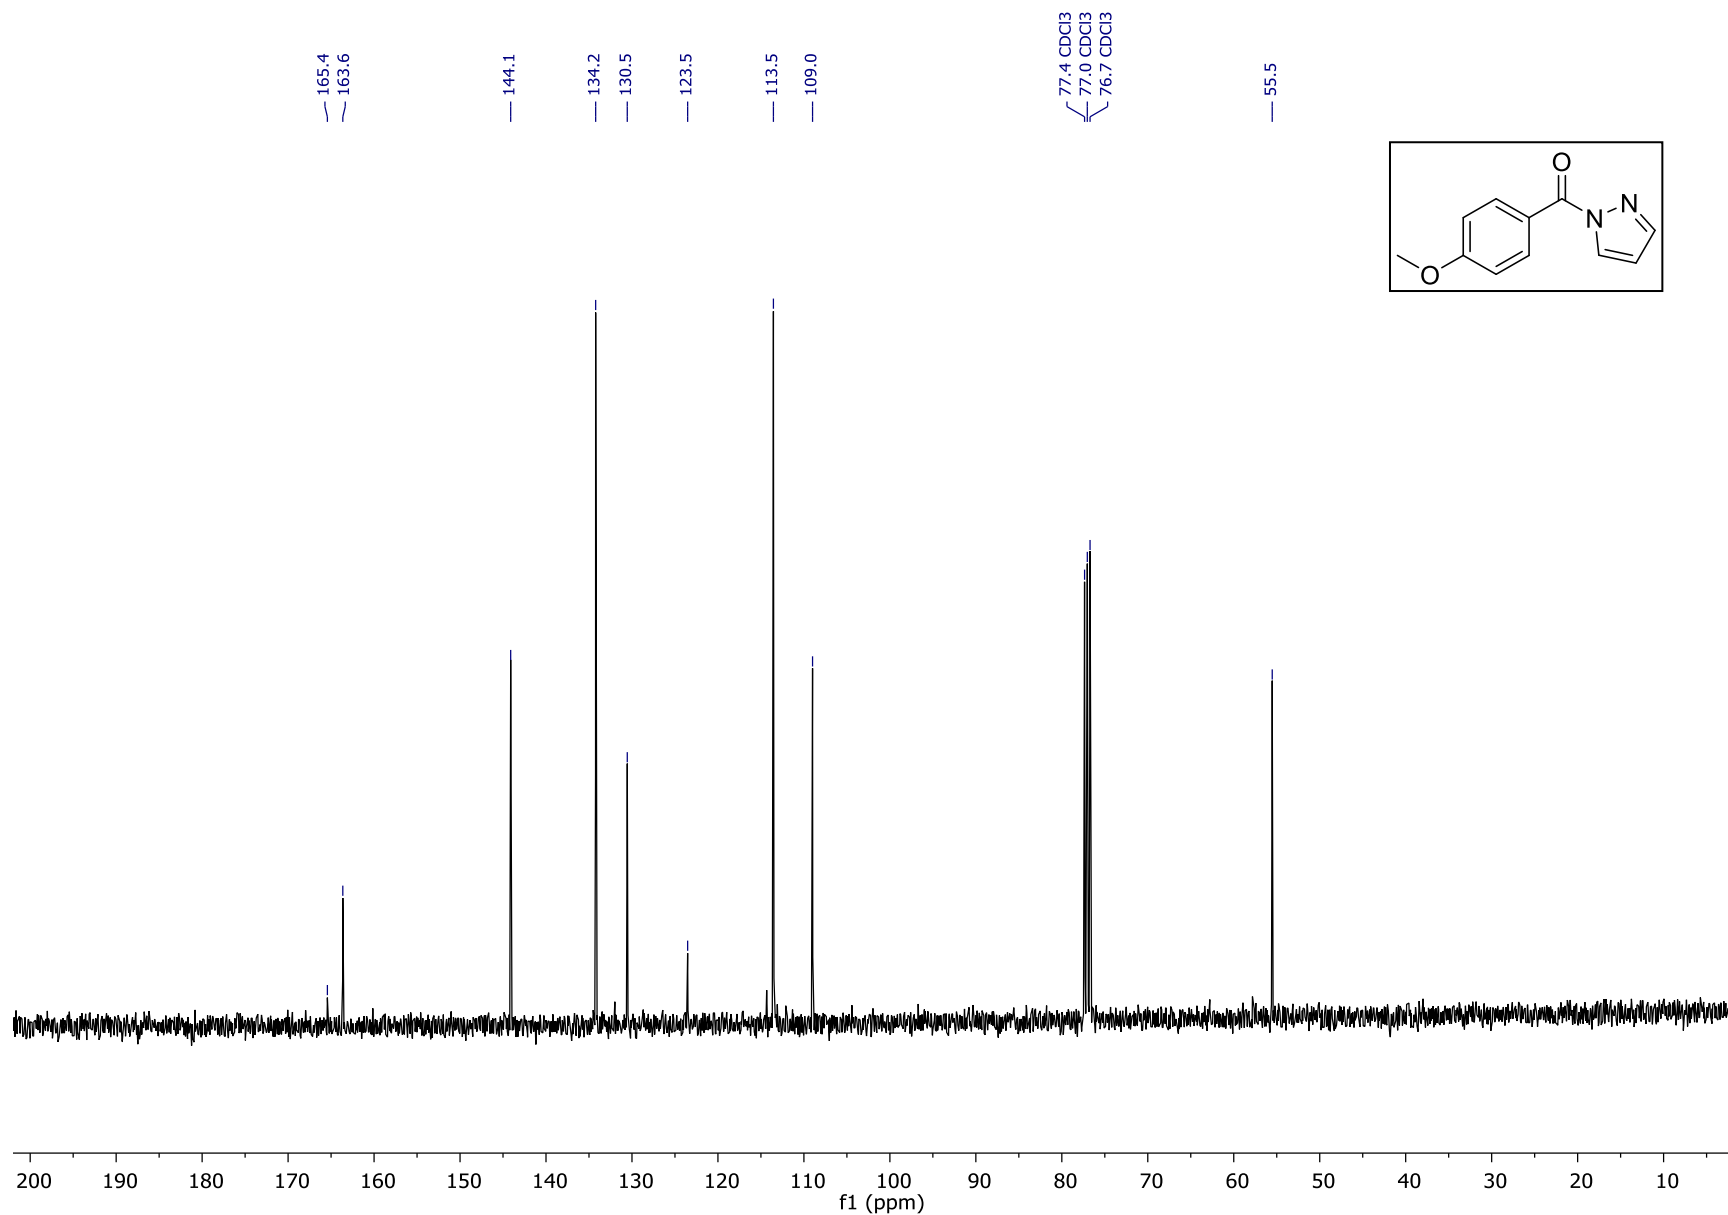

**<sup>13</sup>C-NMR (101 MHz CDCl<sub>3</sub>) (1*H*-Pyrazol-1-yl)(4-(trifluoromethyl)phenyl)methanone (7f).**

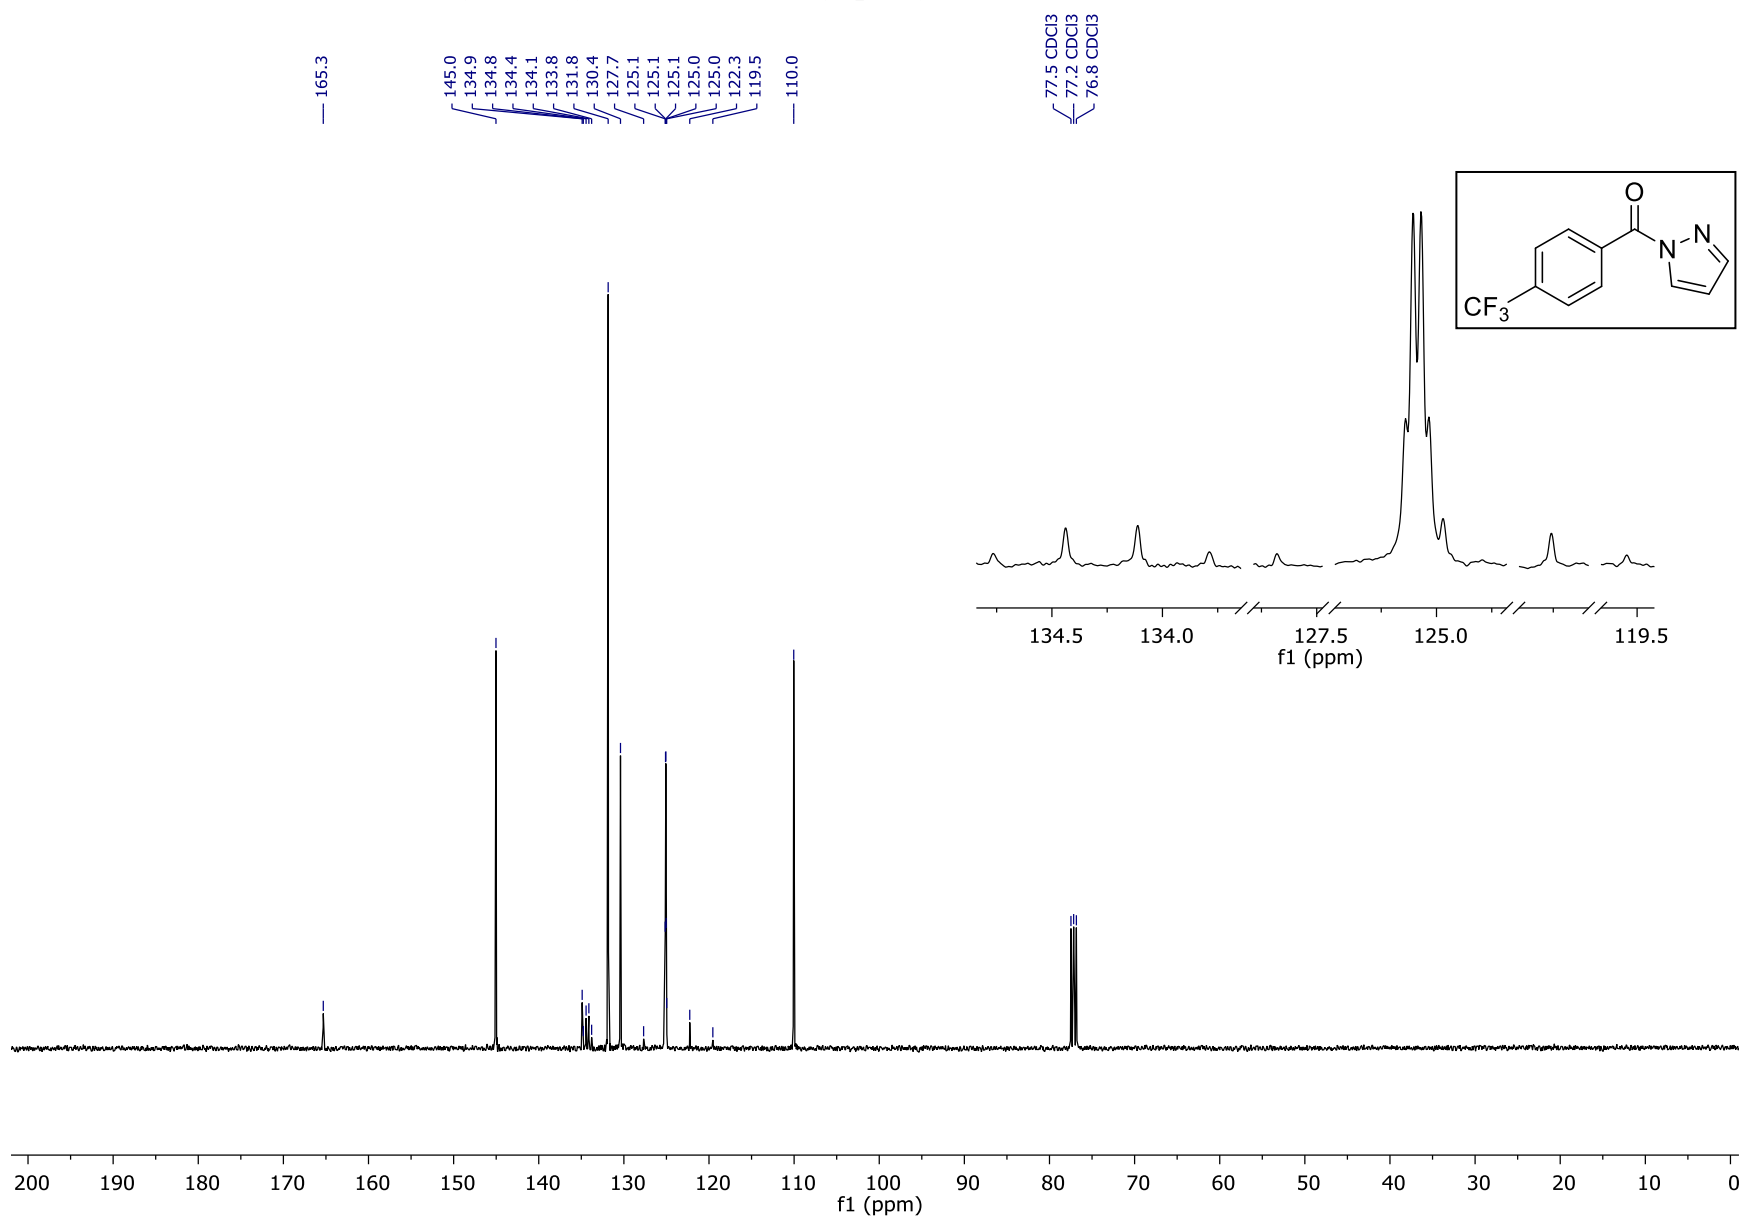

<sup>13</sup>C-NMR (101 MHz CDCl<sub>3</sub>) 4-(1*H*-Pyrazole-1-carbonyl)benzotrile (7g)

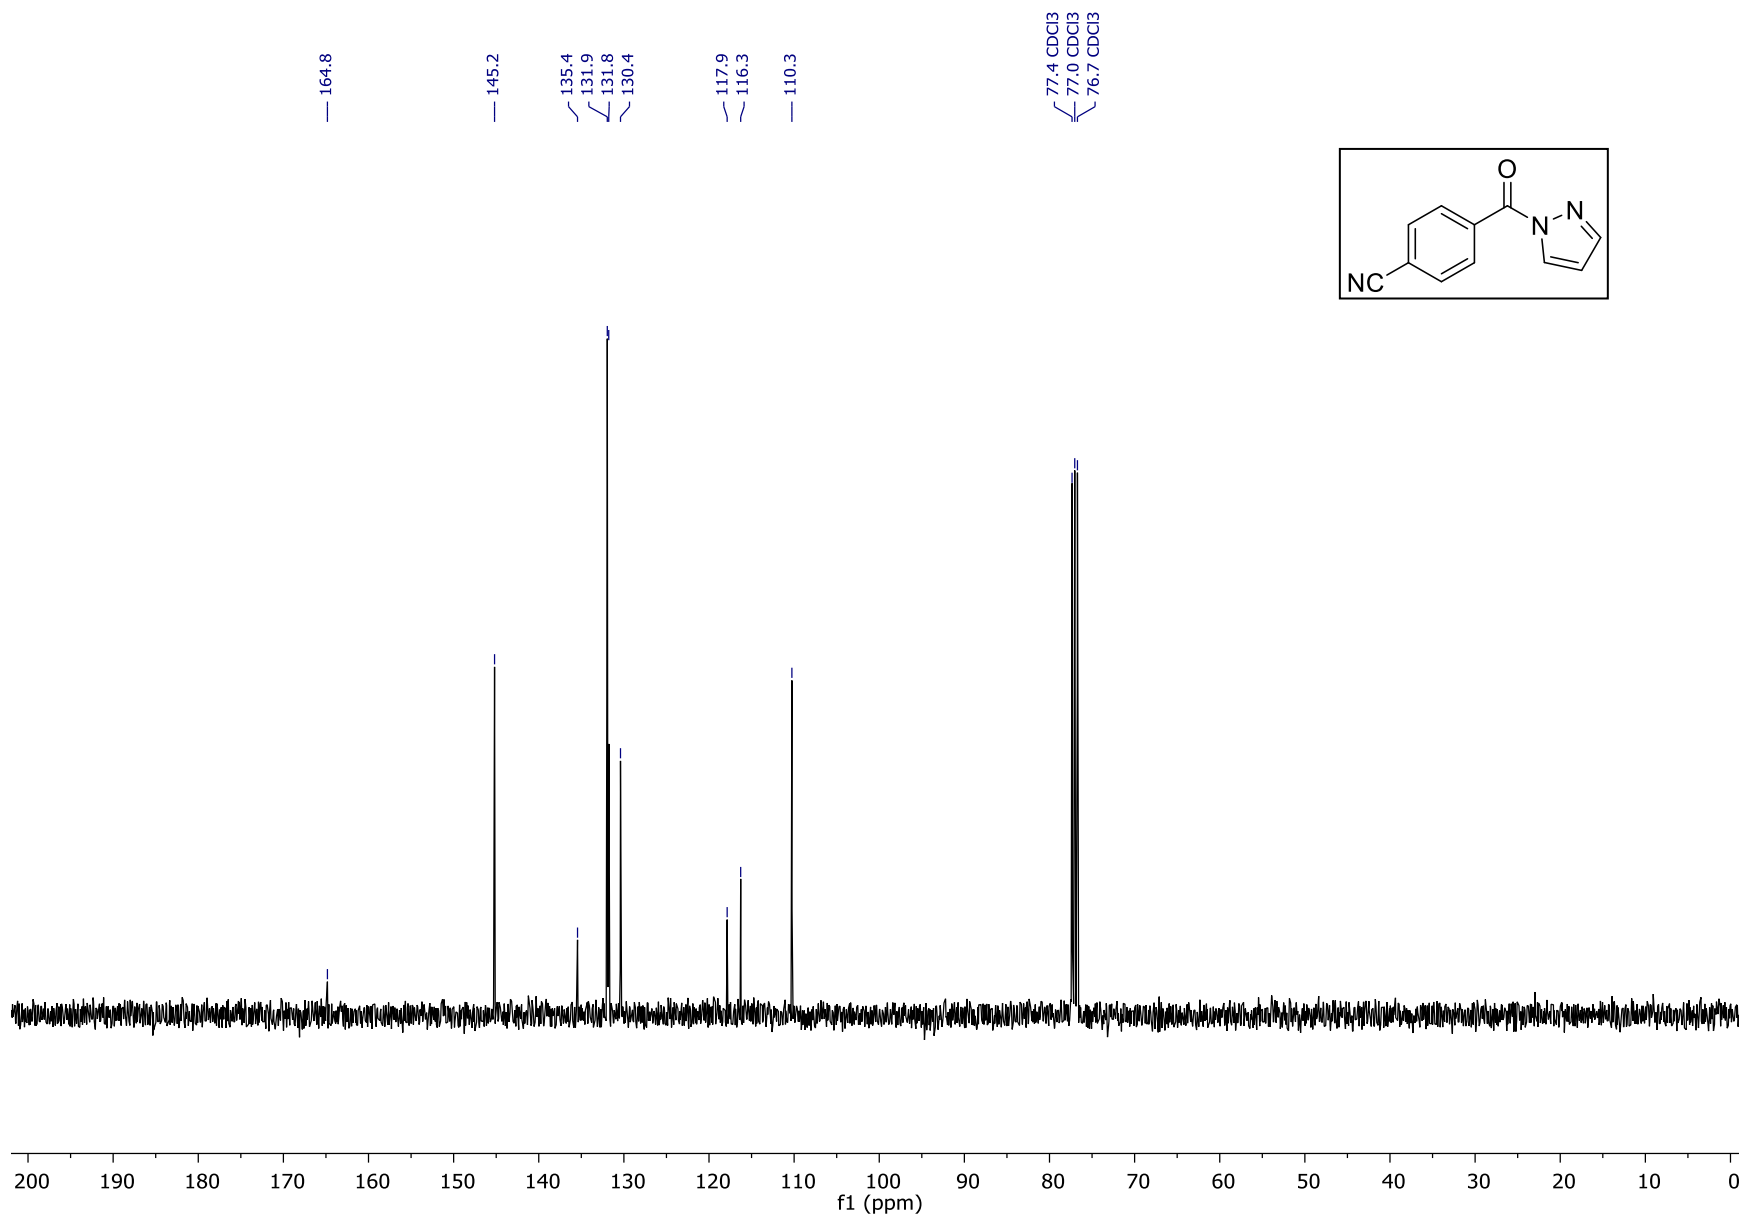

<sup>13</sup>C-NMR (101 MHz CDCl<sub>3</sub>) (4-Nitrophenyl)(1H-pyrazol-1-yl)methanone (7h)

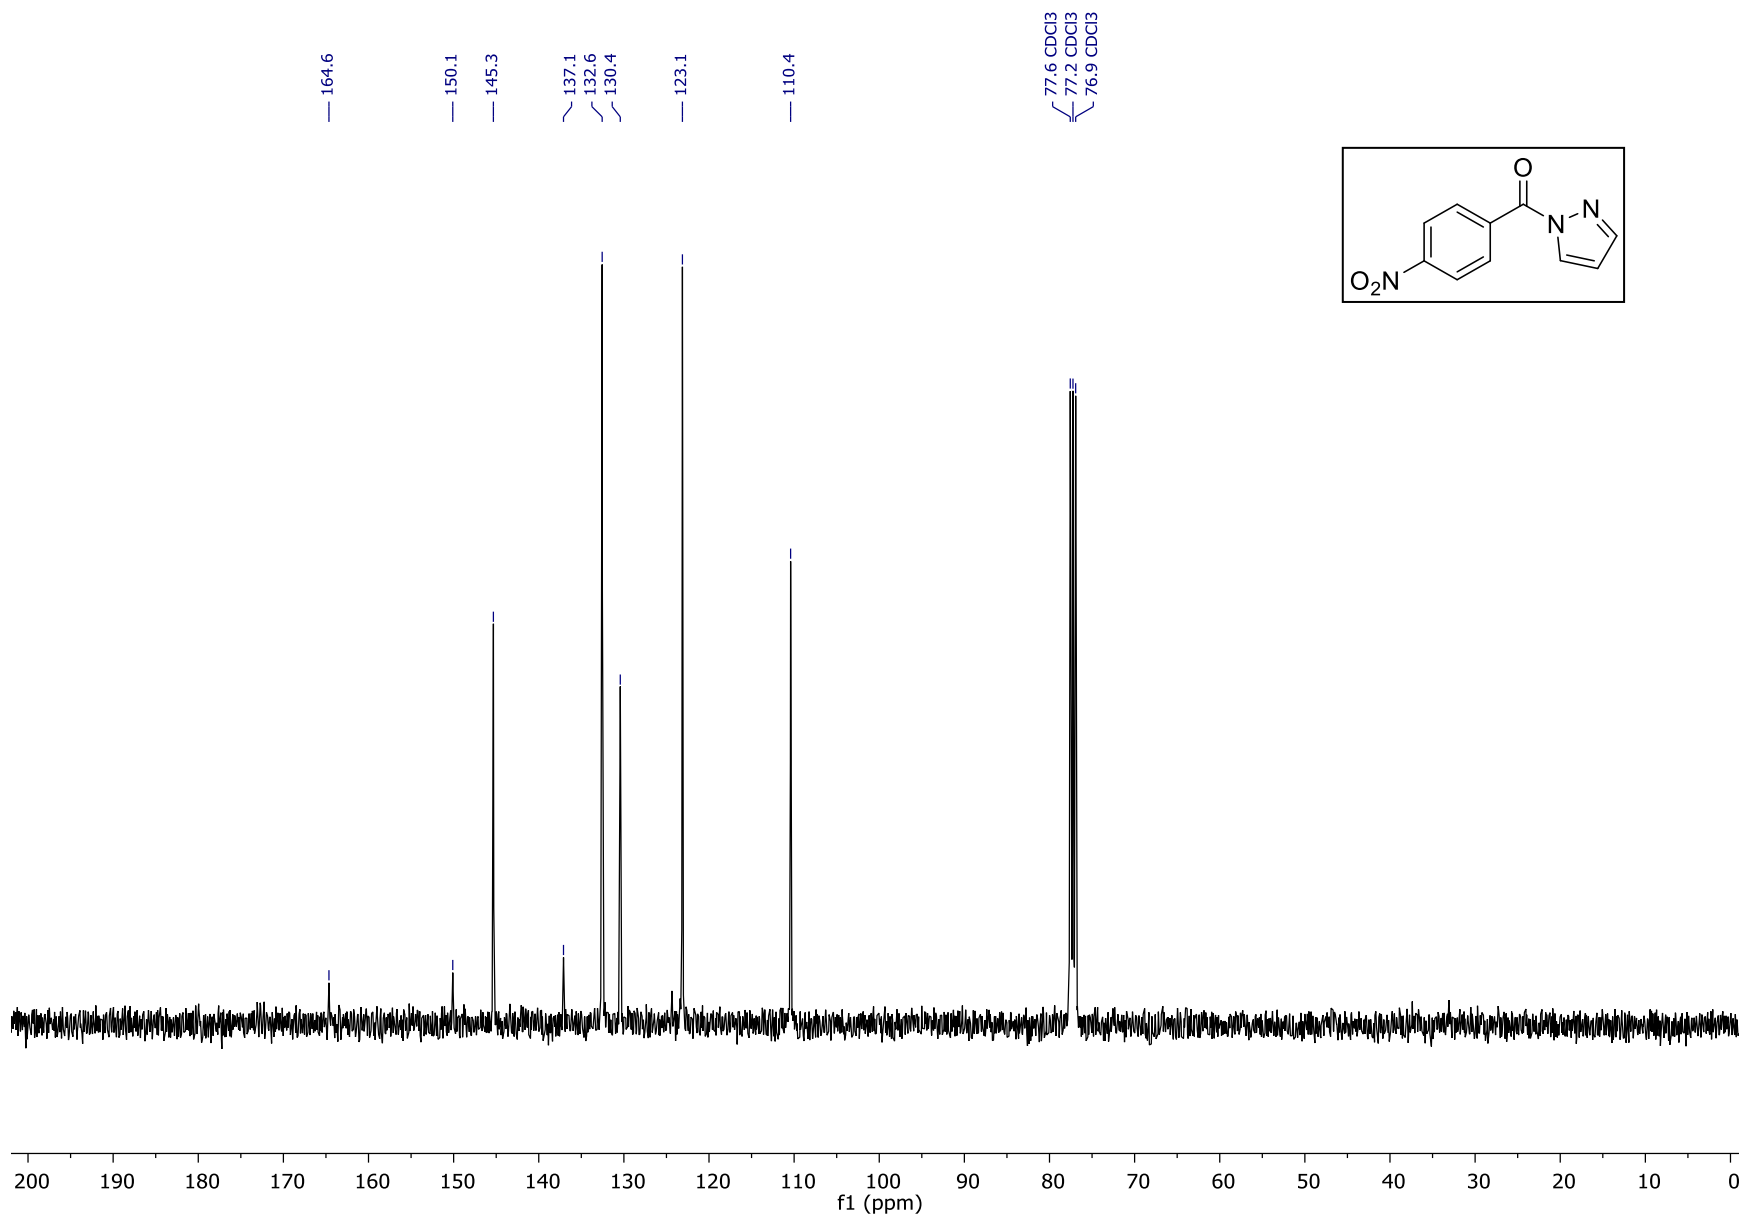

<sup>13</sup>C-NMR (101 MHz CDCl<sub>3</sub>) Methyl 4-(1H-pyrazole-1-carbonyl)benzoate (7i)

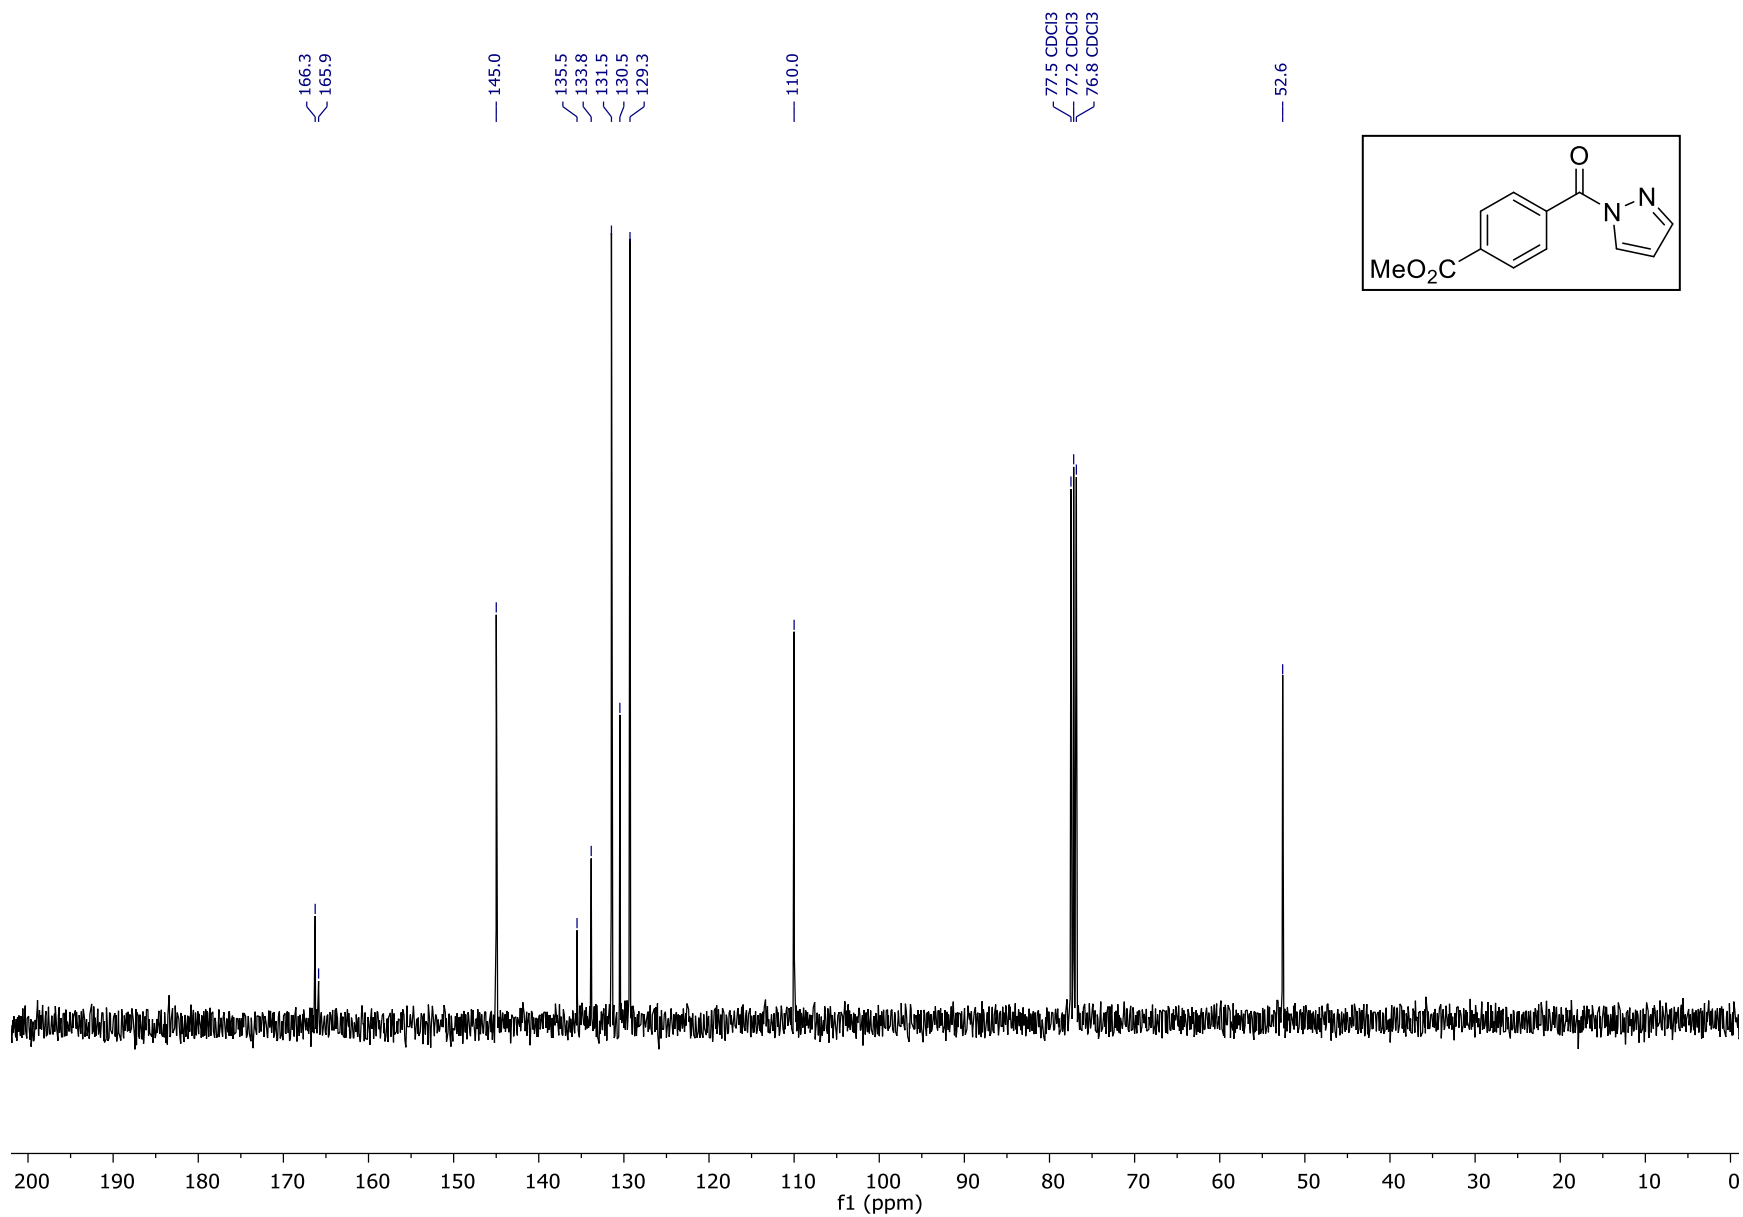

**<sup>13</sup>C-NMR (101 MHz CDCl<sub>3</sub>) (1*H*-Pyrazol-1-yl)(*m*-tolyl)methanone (7j)**

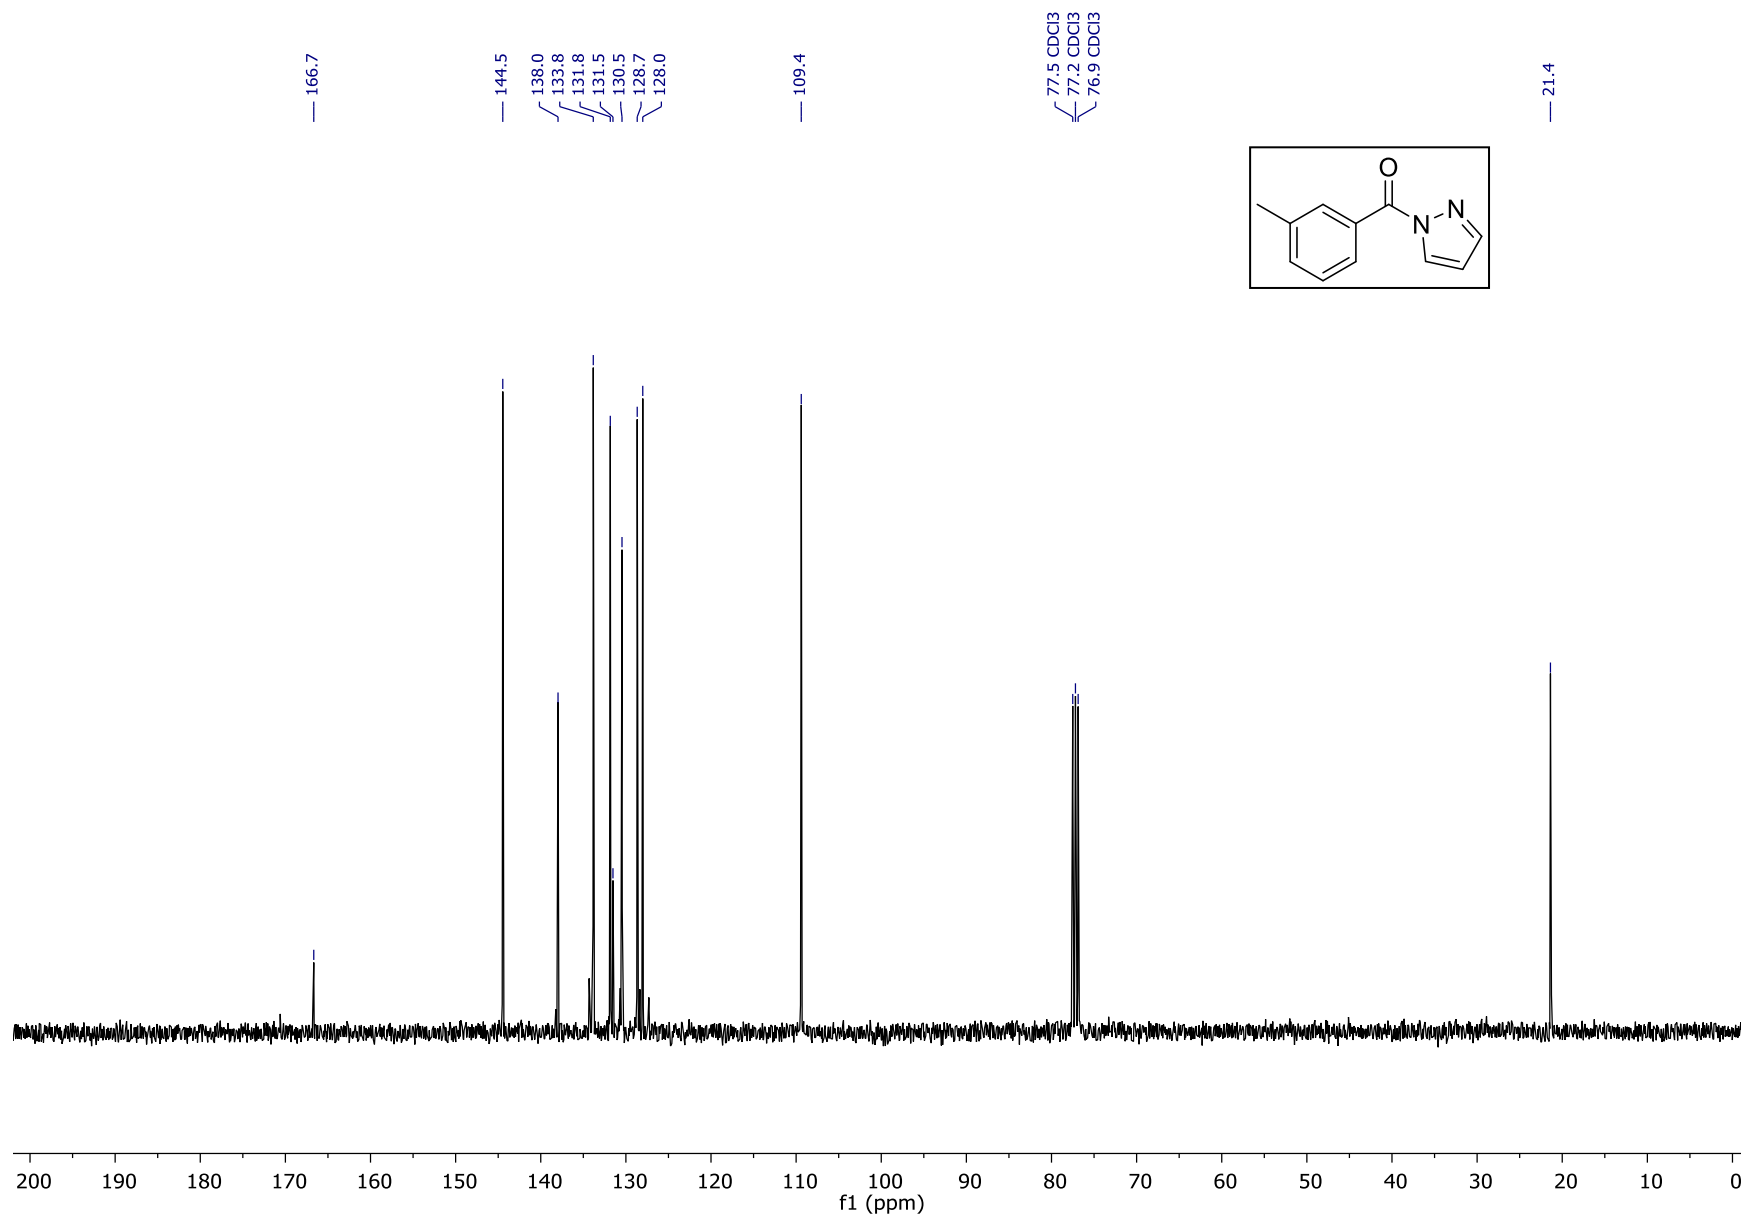

**<sup>13</sup>C-NMR (101 MHz CDCl<sub>3</sub>) (3-Nitrophenyl)(1H-pyrazol-1-yl)methanone (7k)**

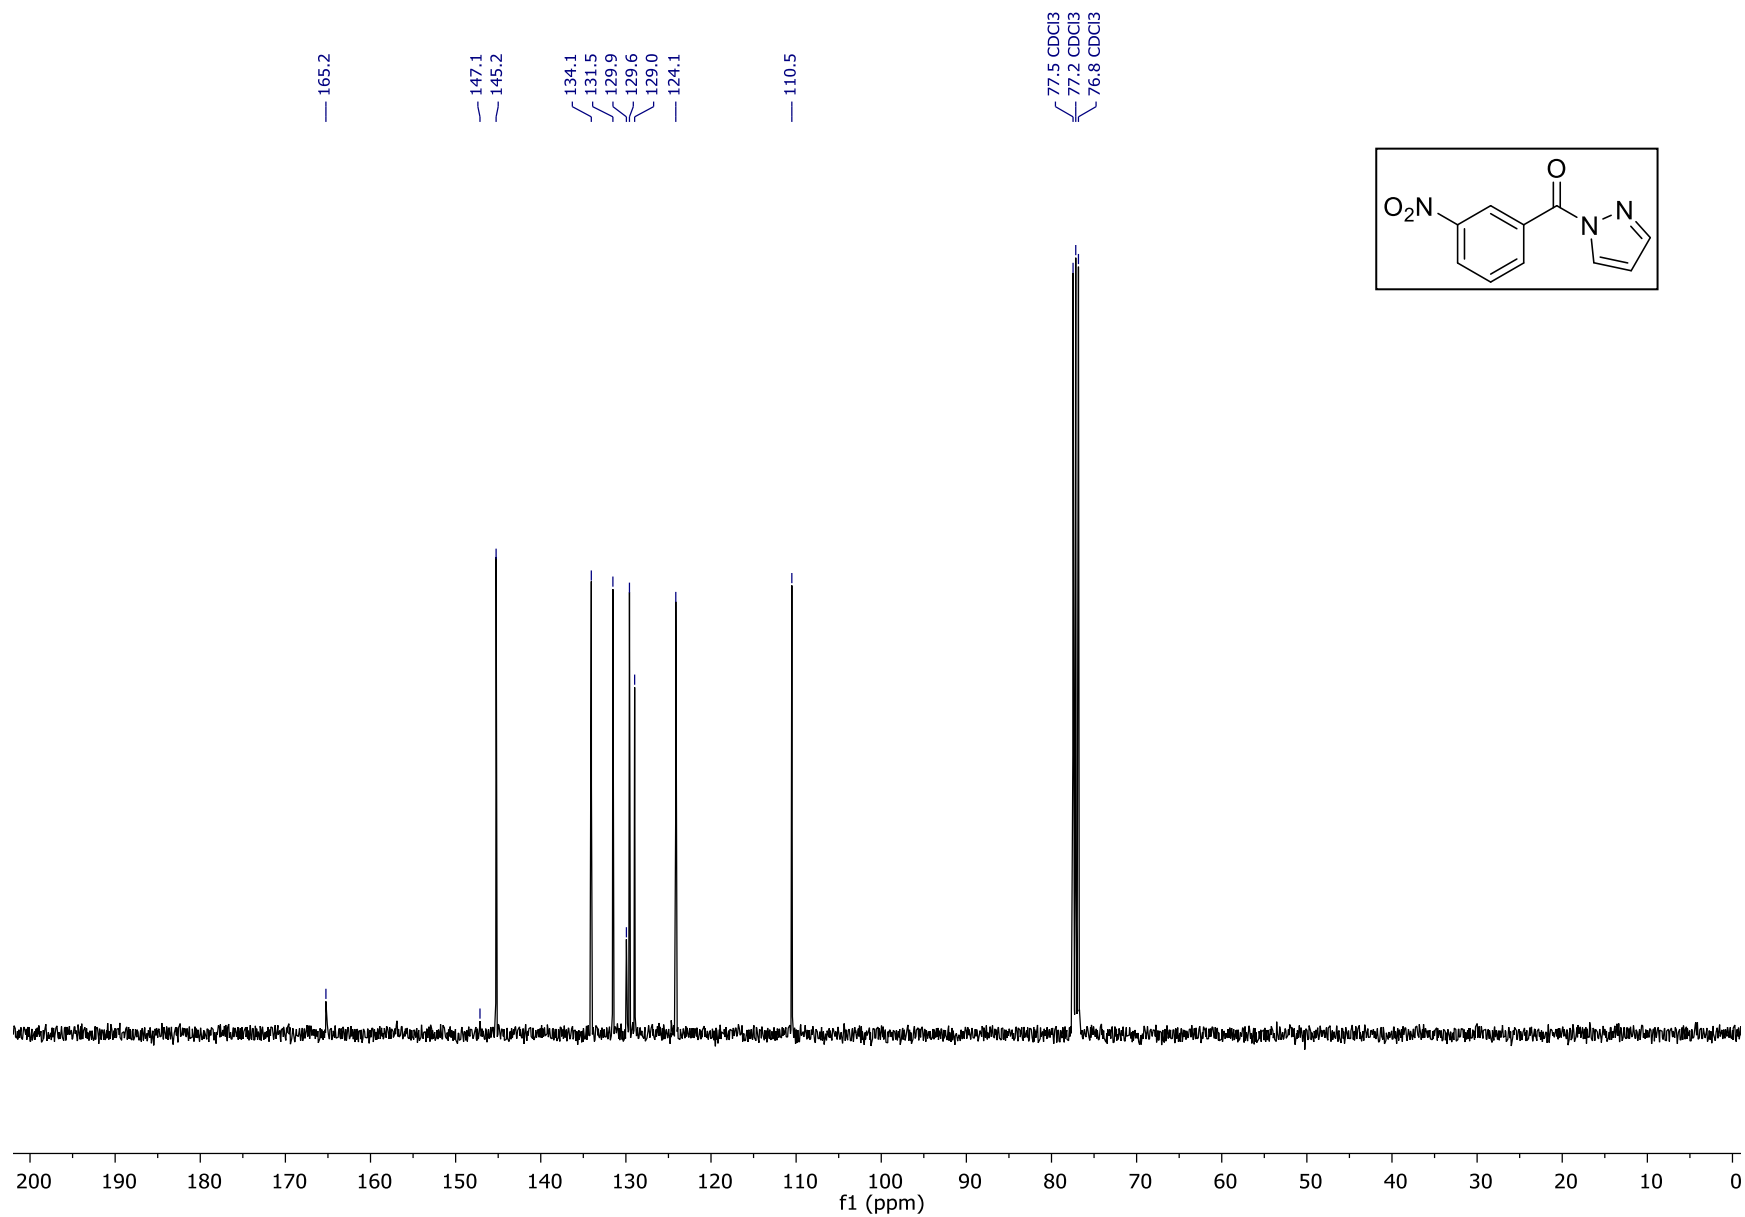

**<sup>13</sup>C-NMR (101 MHz CDCl<sub>3</sub>) (3-Methoxyphenyl)(1H-pyrazol-1-yl)methanone (7I)**

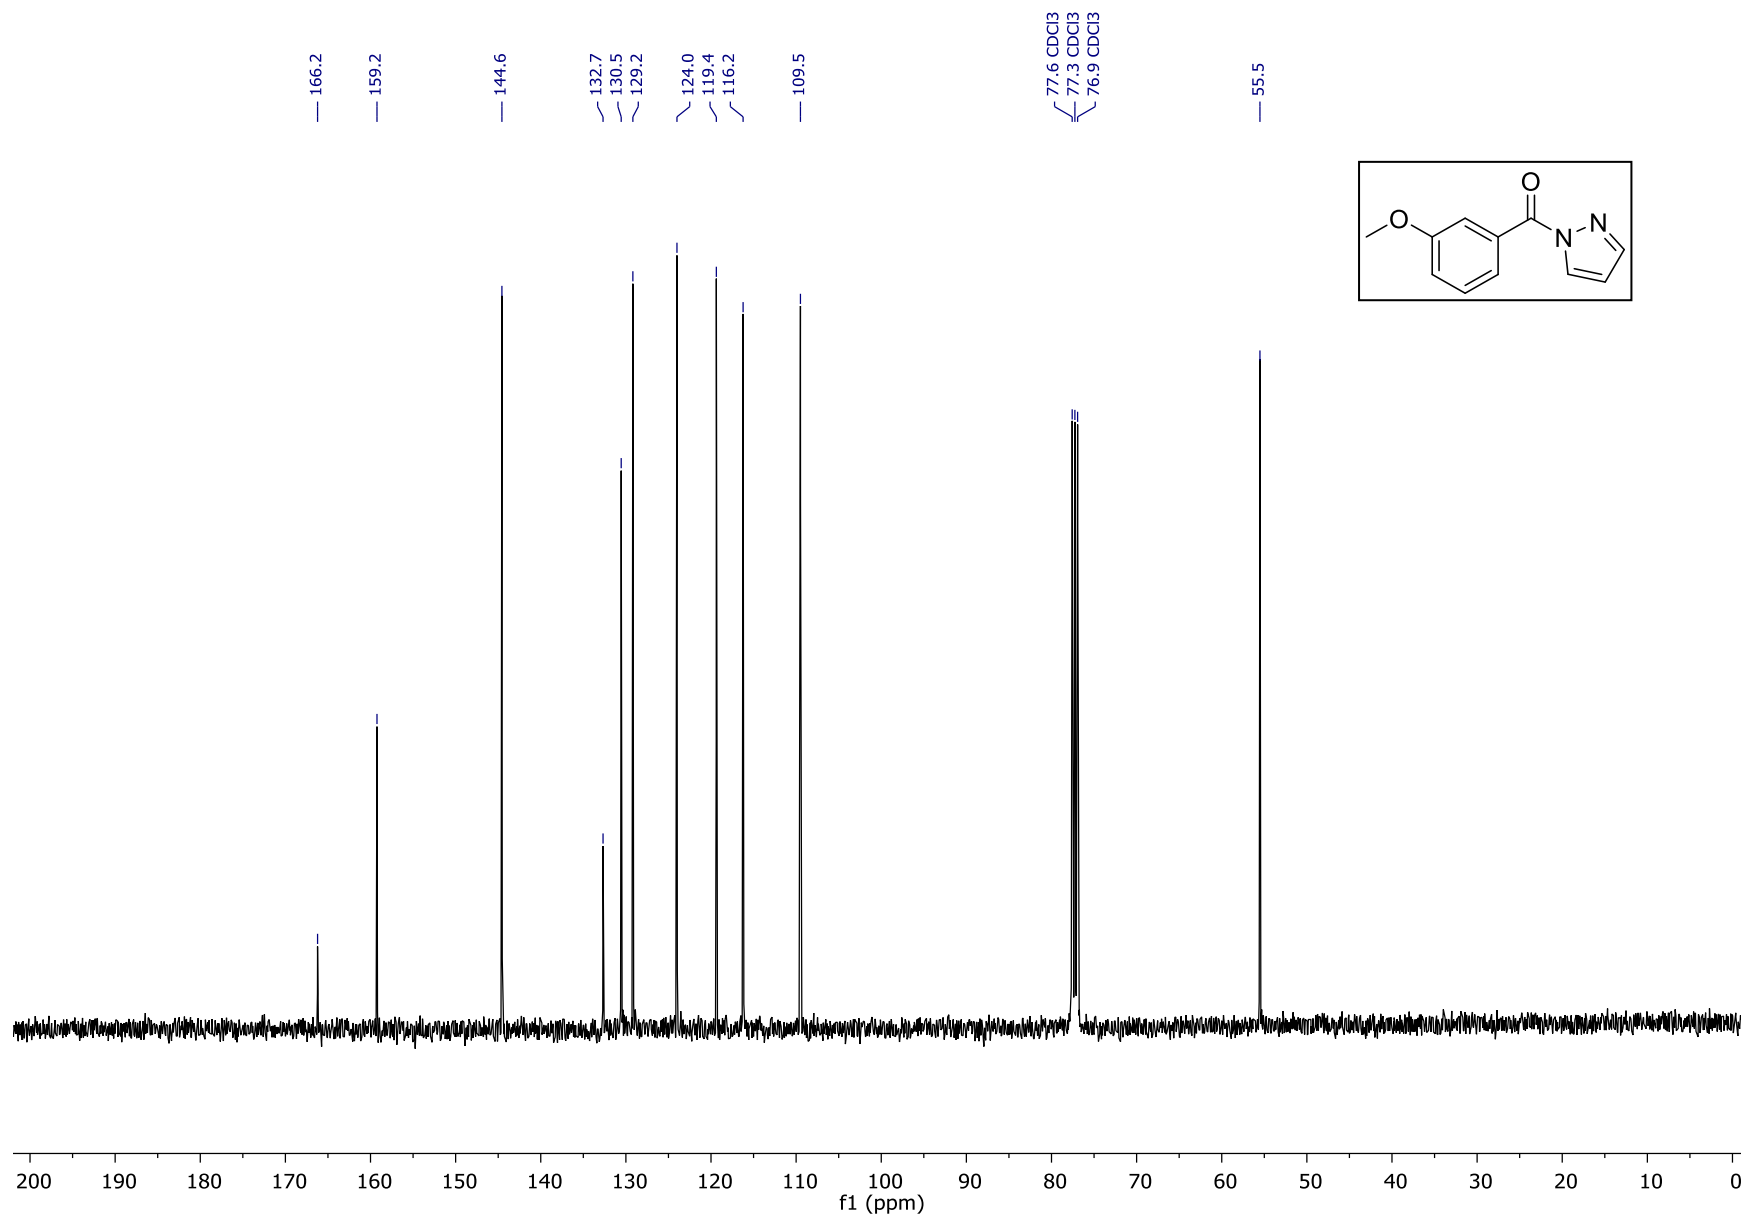



**<sup>13</sup>C-NMR (101 MHz CDCl<sub>3</sub>) (2-Fluorophenyl)(1H-pyrazol-1-yl)methanone (7m)**

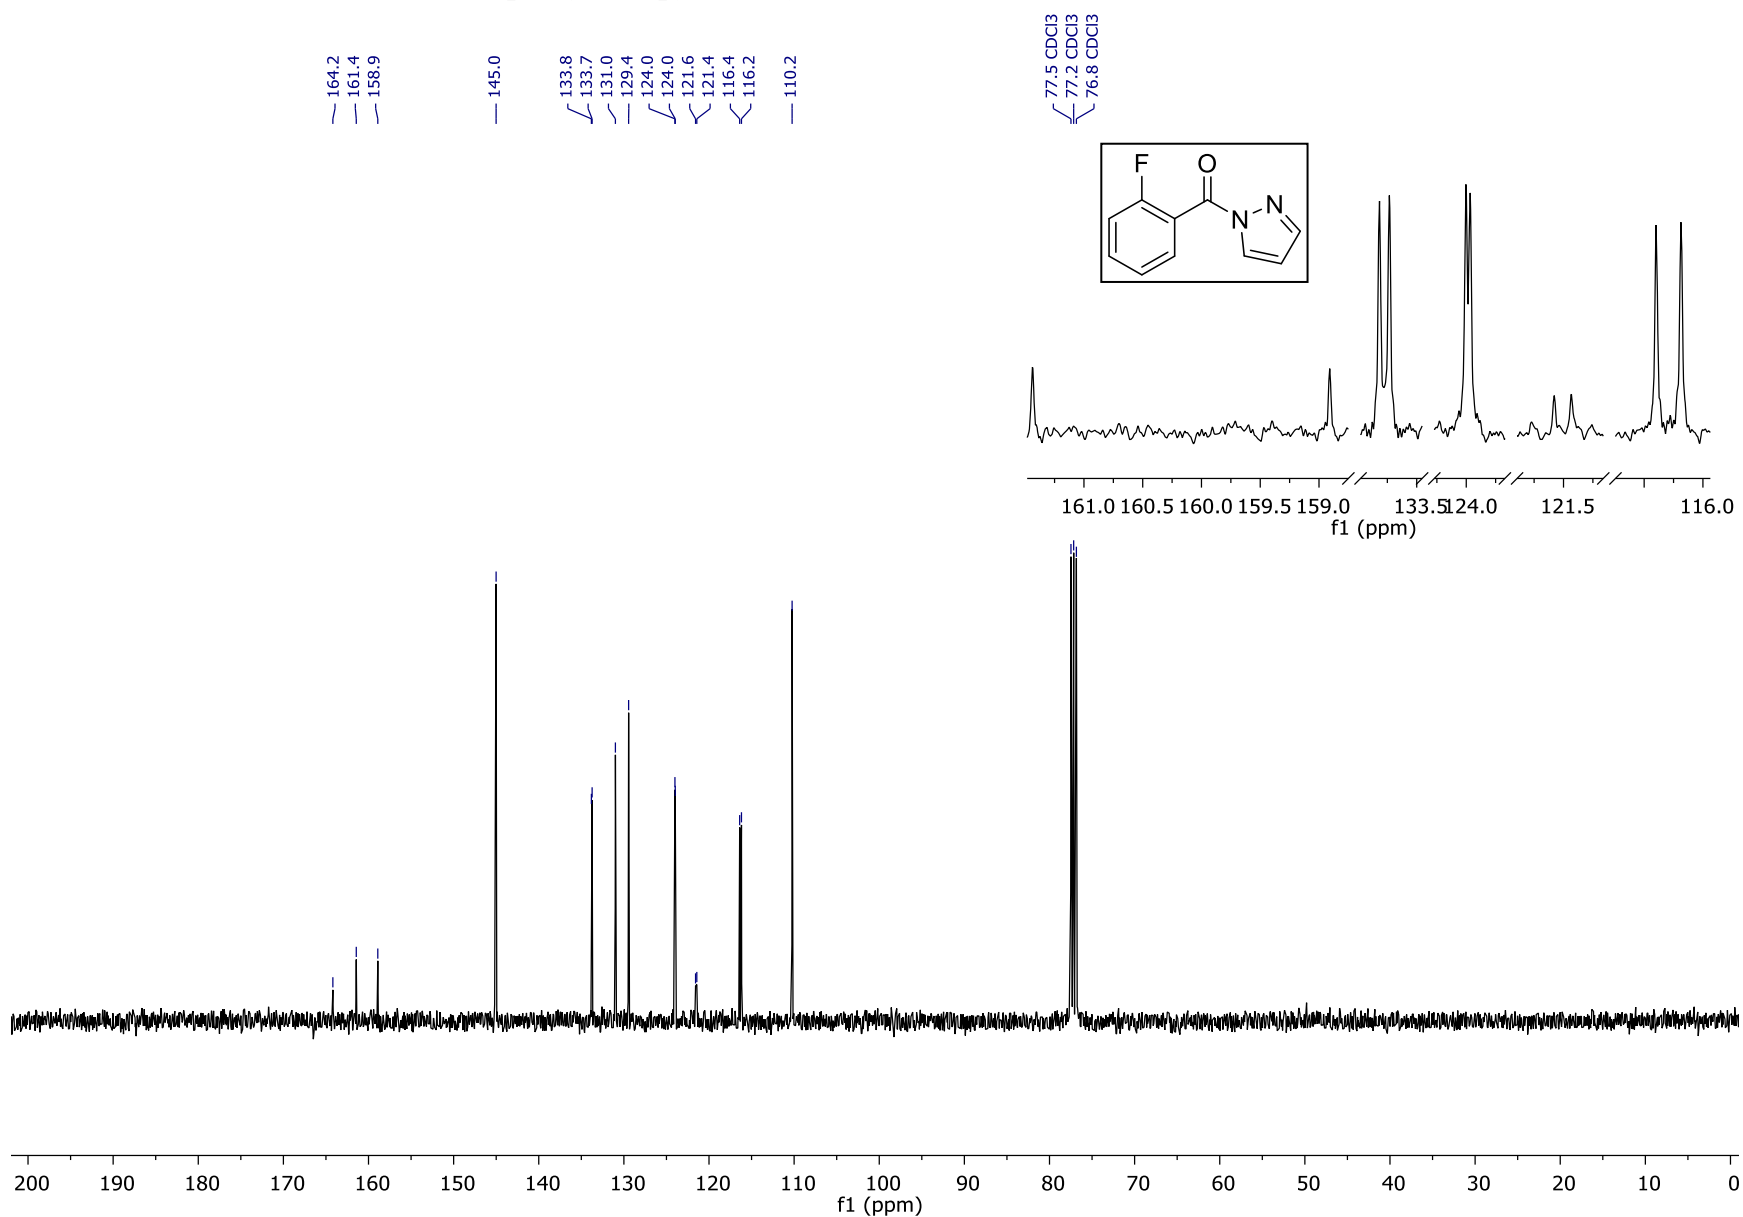

<sup>13</sup>C-NMR (75 MHz CDCl<sub>3</sub>) (2-Nitrophenyl)(1*H*-pyrazol-1-yl)methanone (7n)

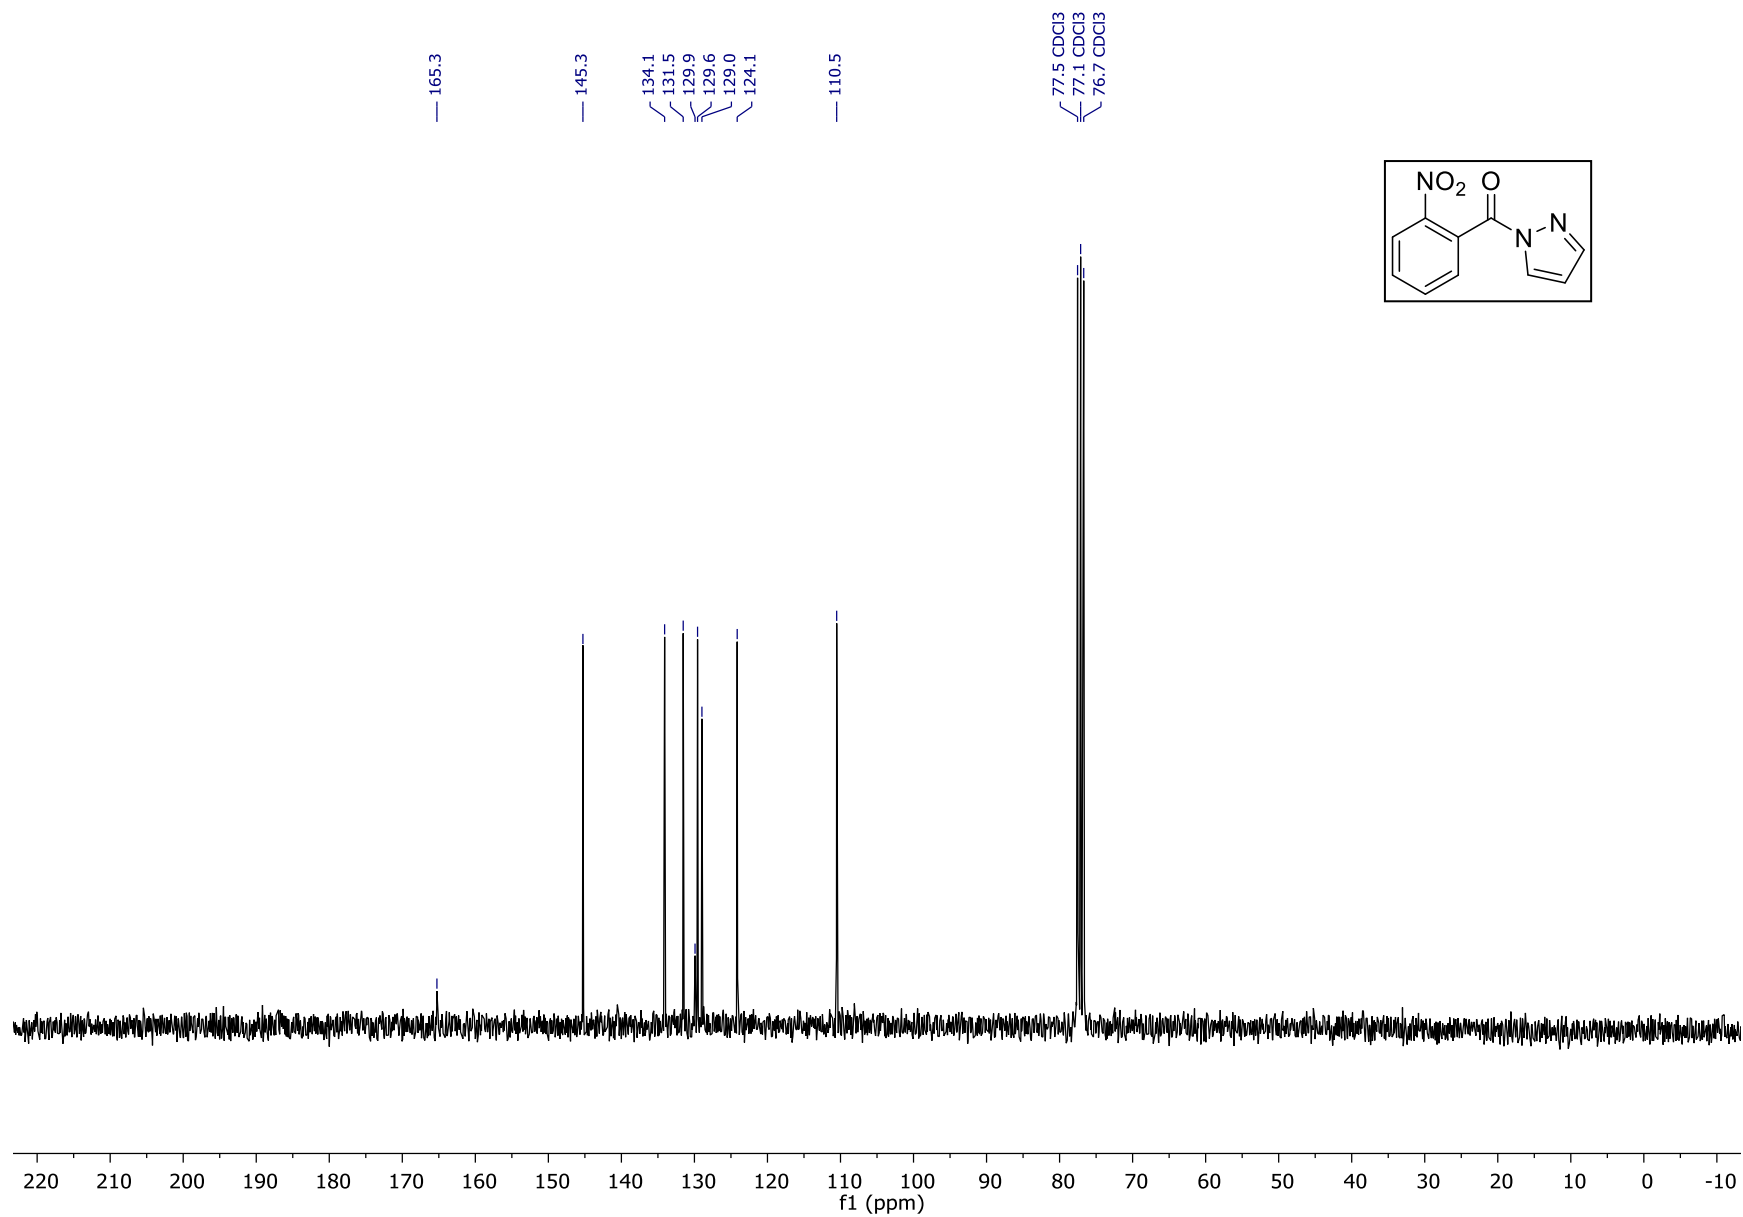

<sup>13</sup>C-NMR (101 MHz CDCl<sub>3</sub>) (1*H*-Pyrazol-1-yl)(*o*-tolyl)methanone (7o)

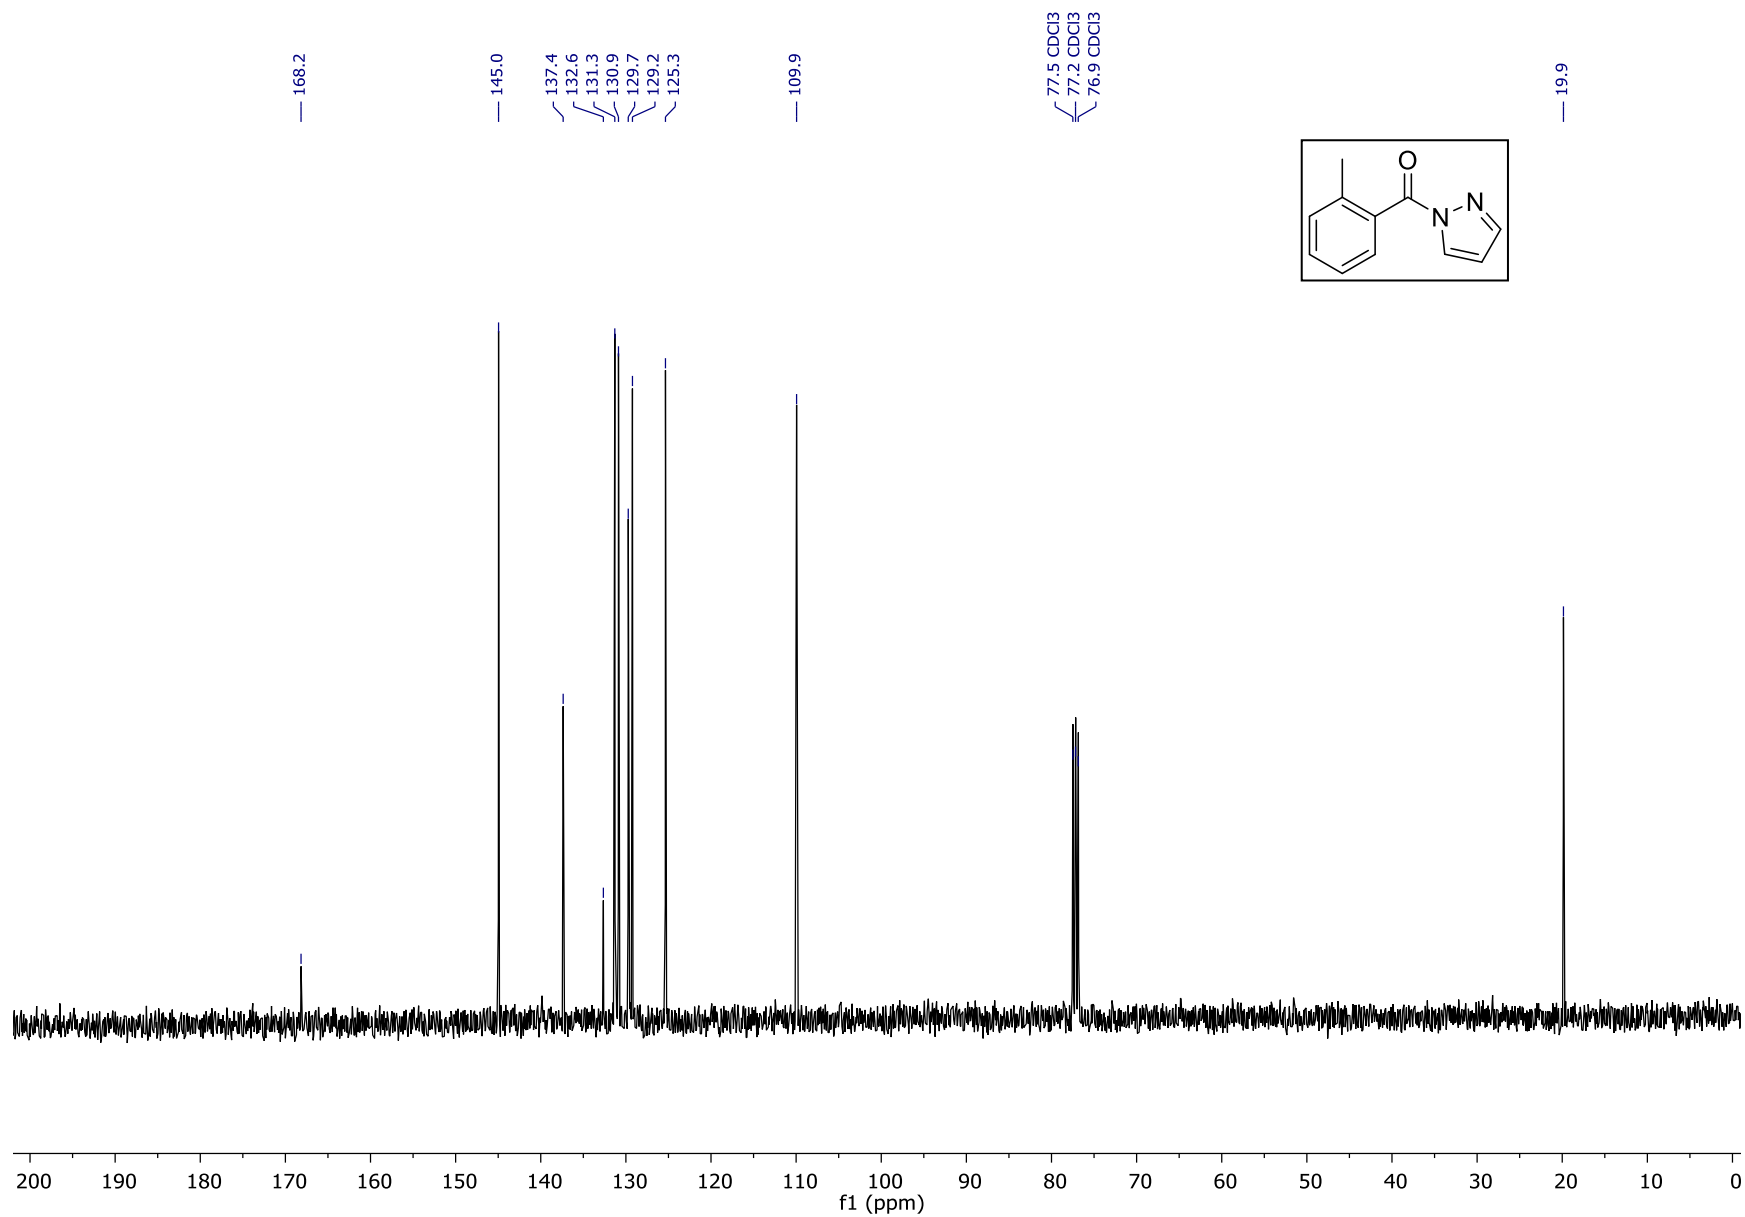

<sup>13</sup>C-NMR (101 MHz CDCl<sub>3</sub>) (2-Methoxyphenyl)(1*H*-pyrazol-1-yl)methanone (7p)

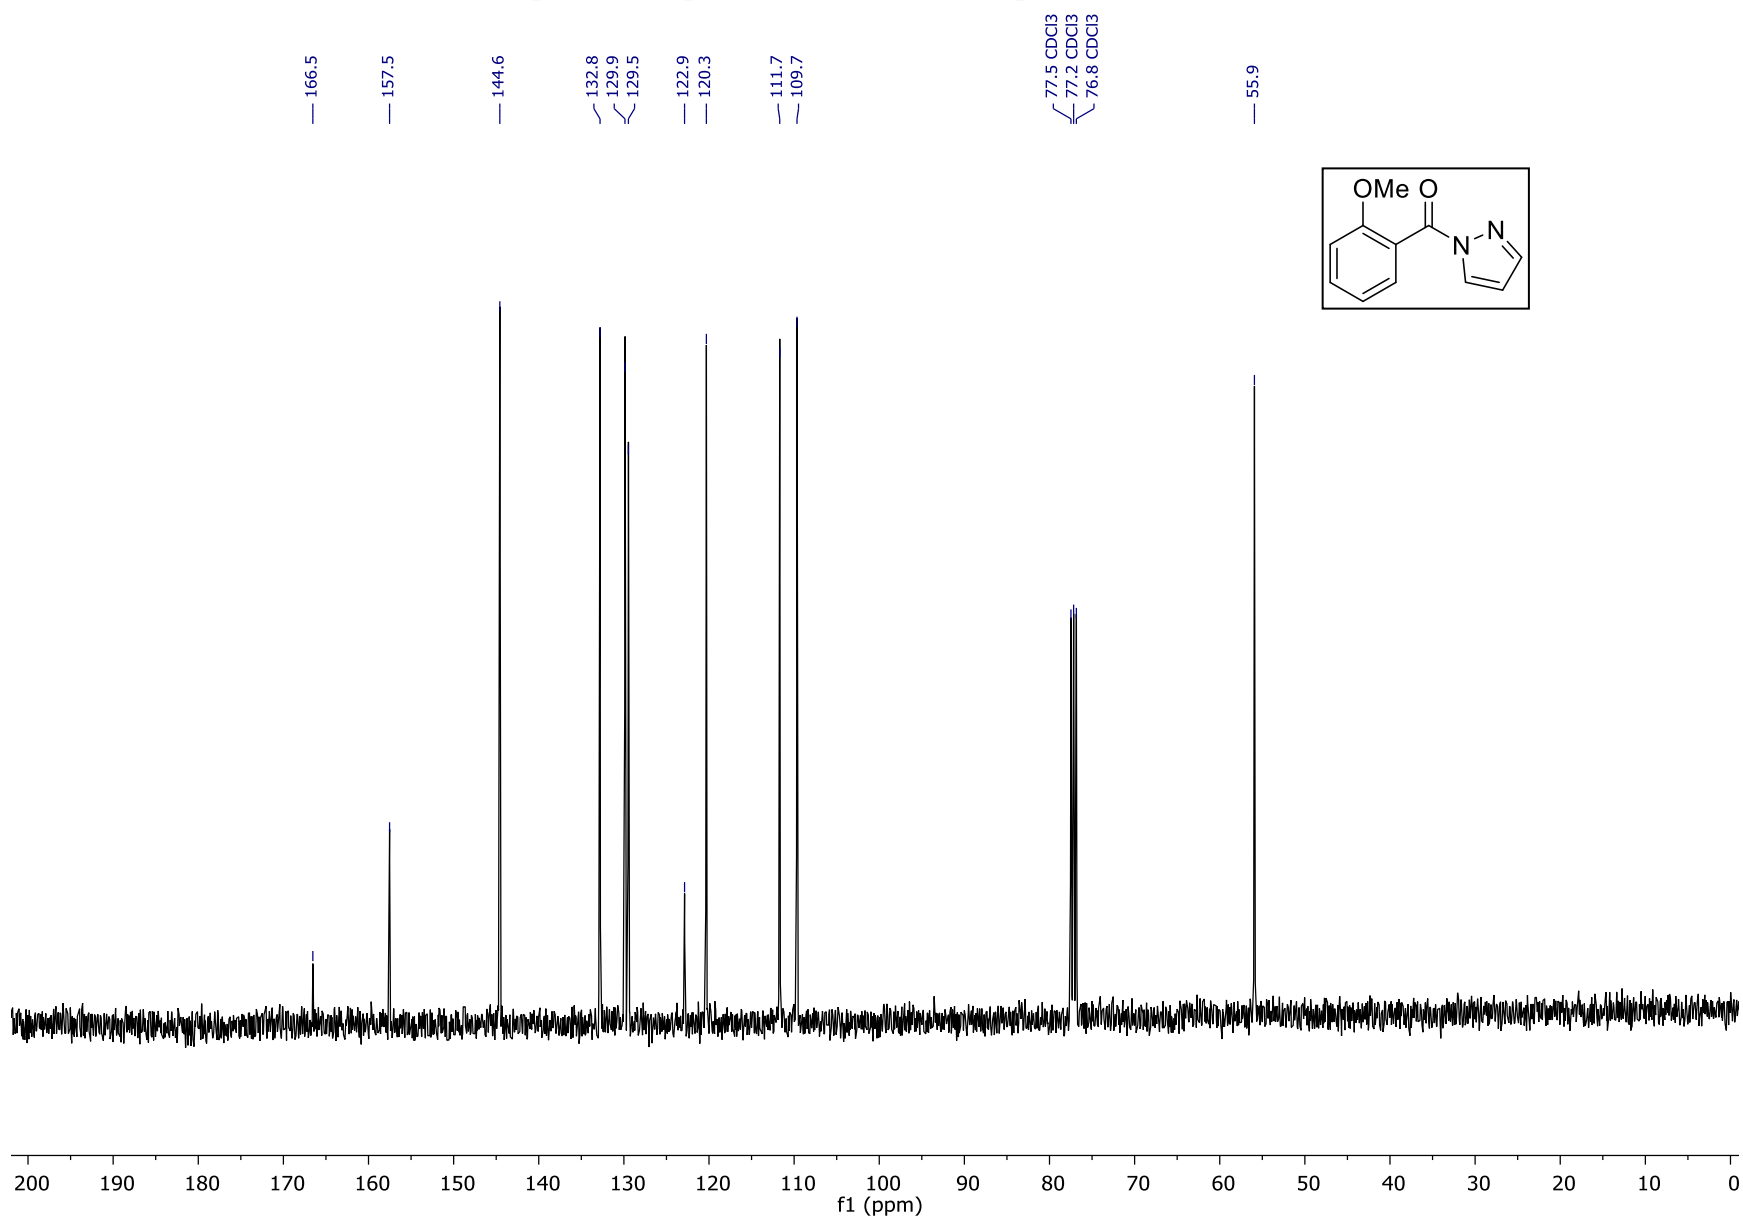

**<sup>13</sup>C-NMR (101 MHz CDCl<sub>3</sub>) (2-Bromo-4-fluorophenyl)(1H-pyrazol-1-yl)methanone (7q)**

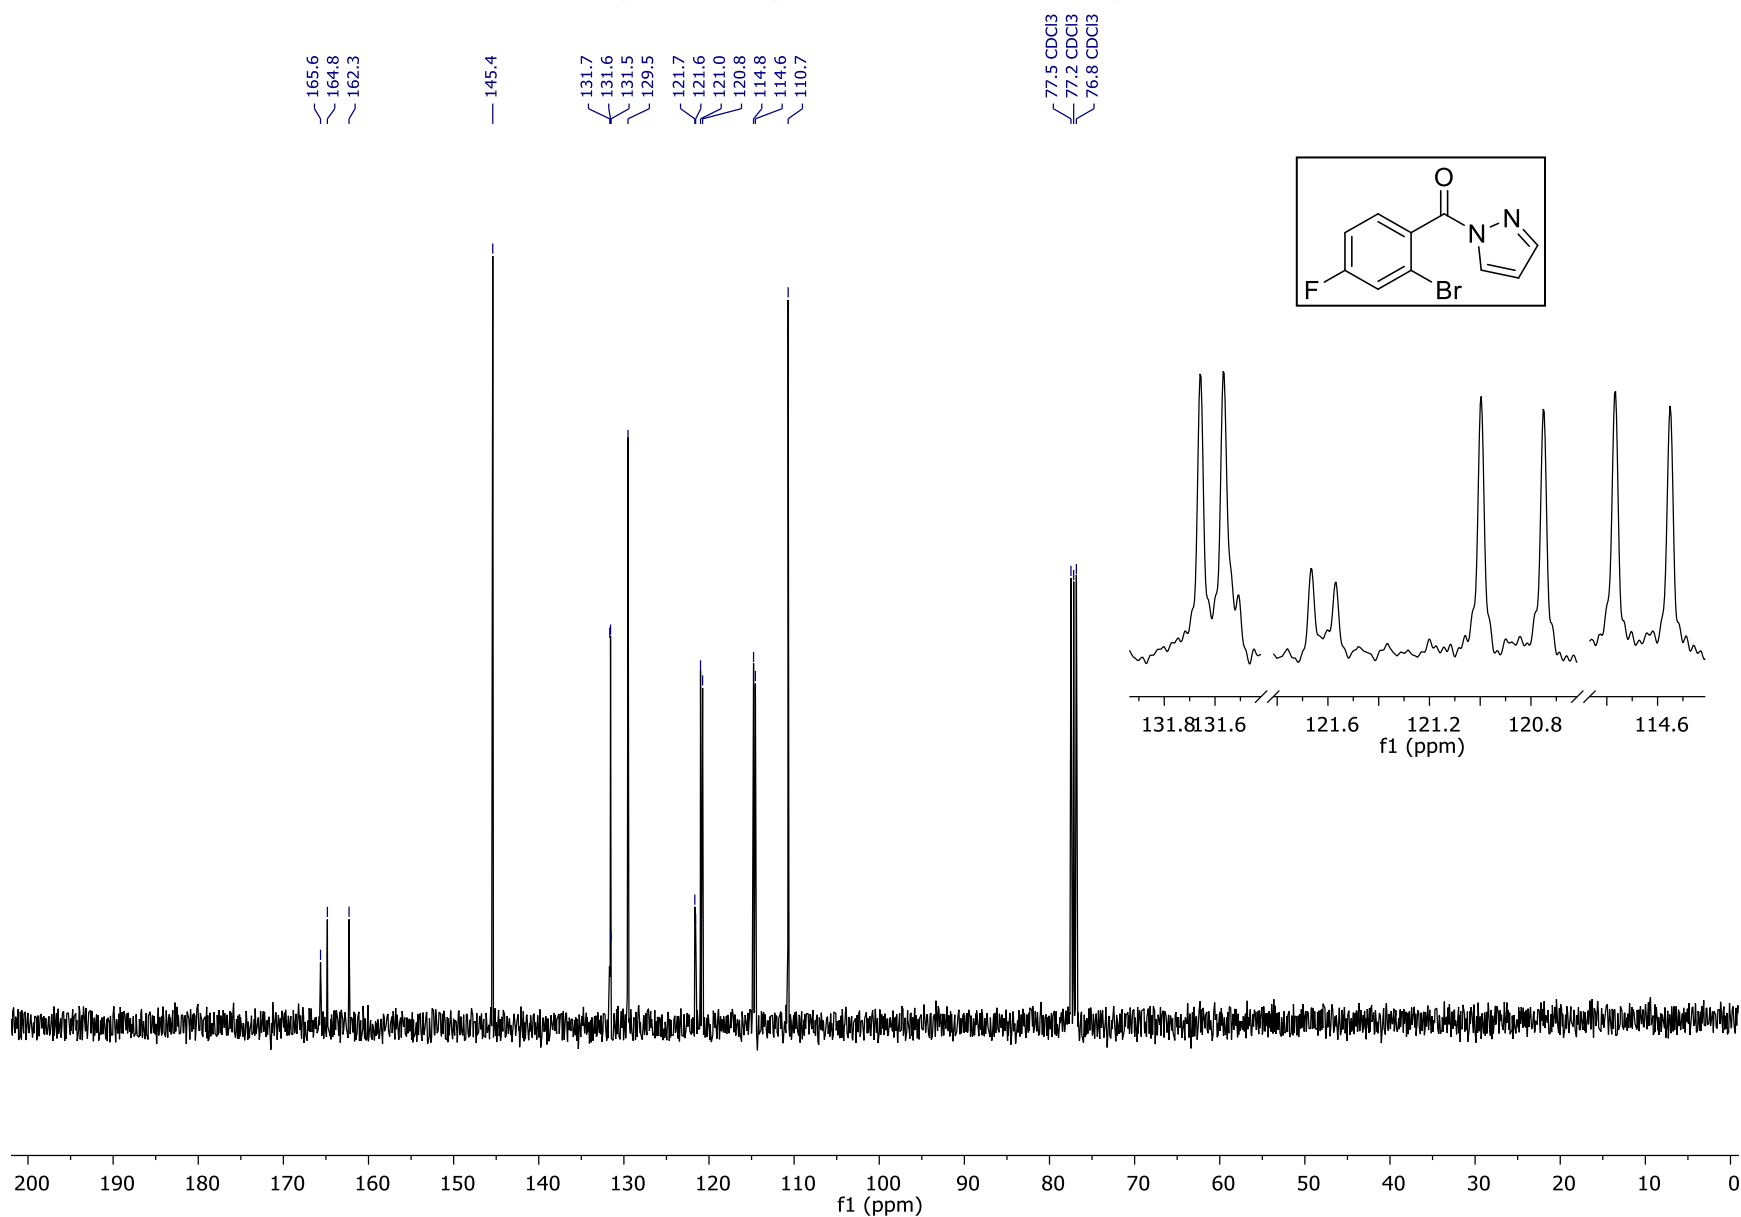

**<sup>13</sup>C-NMR (101 MHz CDCl<sub>3</sub>) Naphtalen-1-yl(1H-pyrazol-1-yl)methanone (7r)**

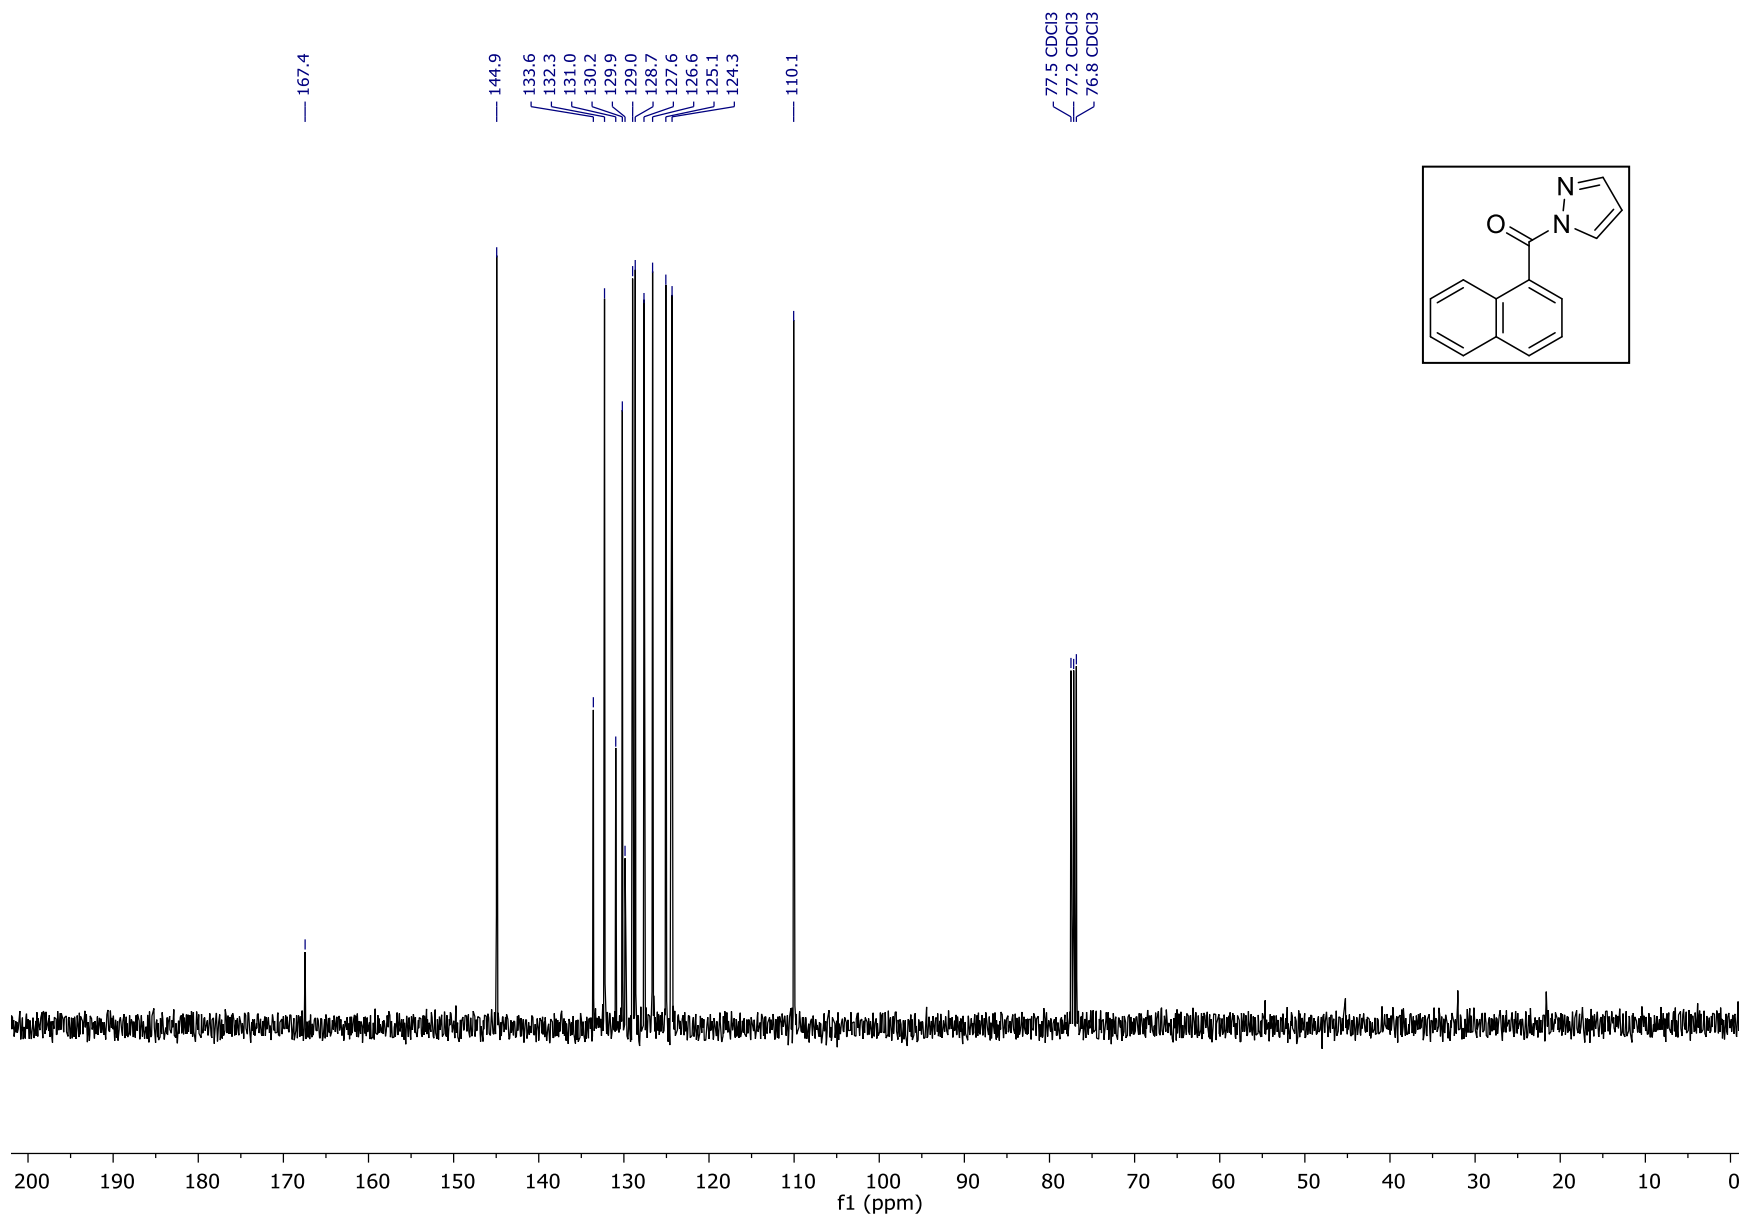

<sup>13</sup>C-NMR (101 MHz CDCl<sub>3</sub>) (2-Chloropyridin-3-yl)(1H-pyrazol-1-yl)methanone (7s)

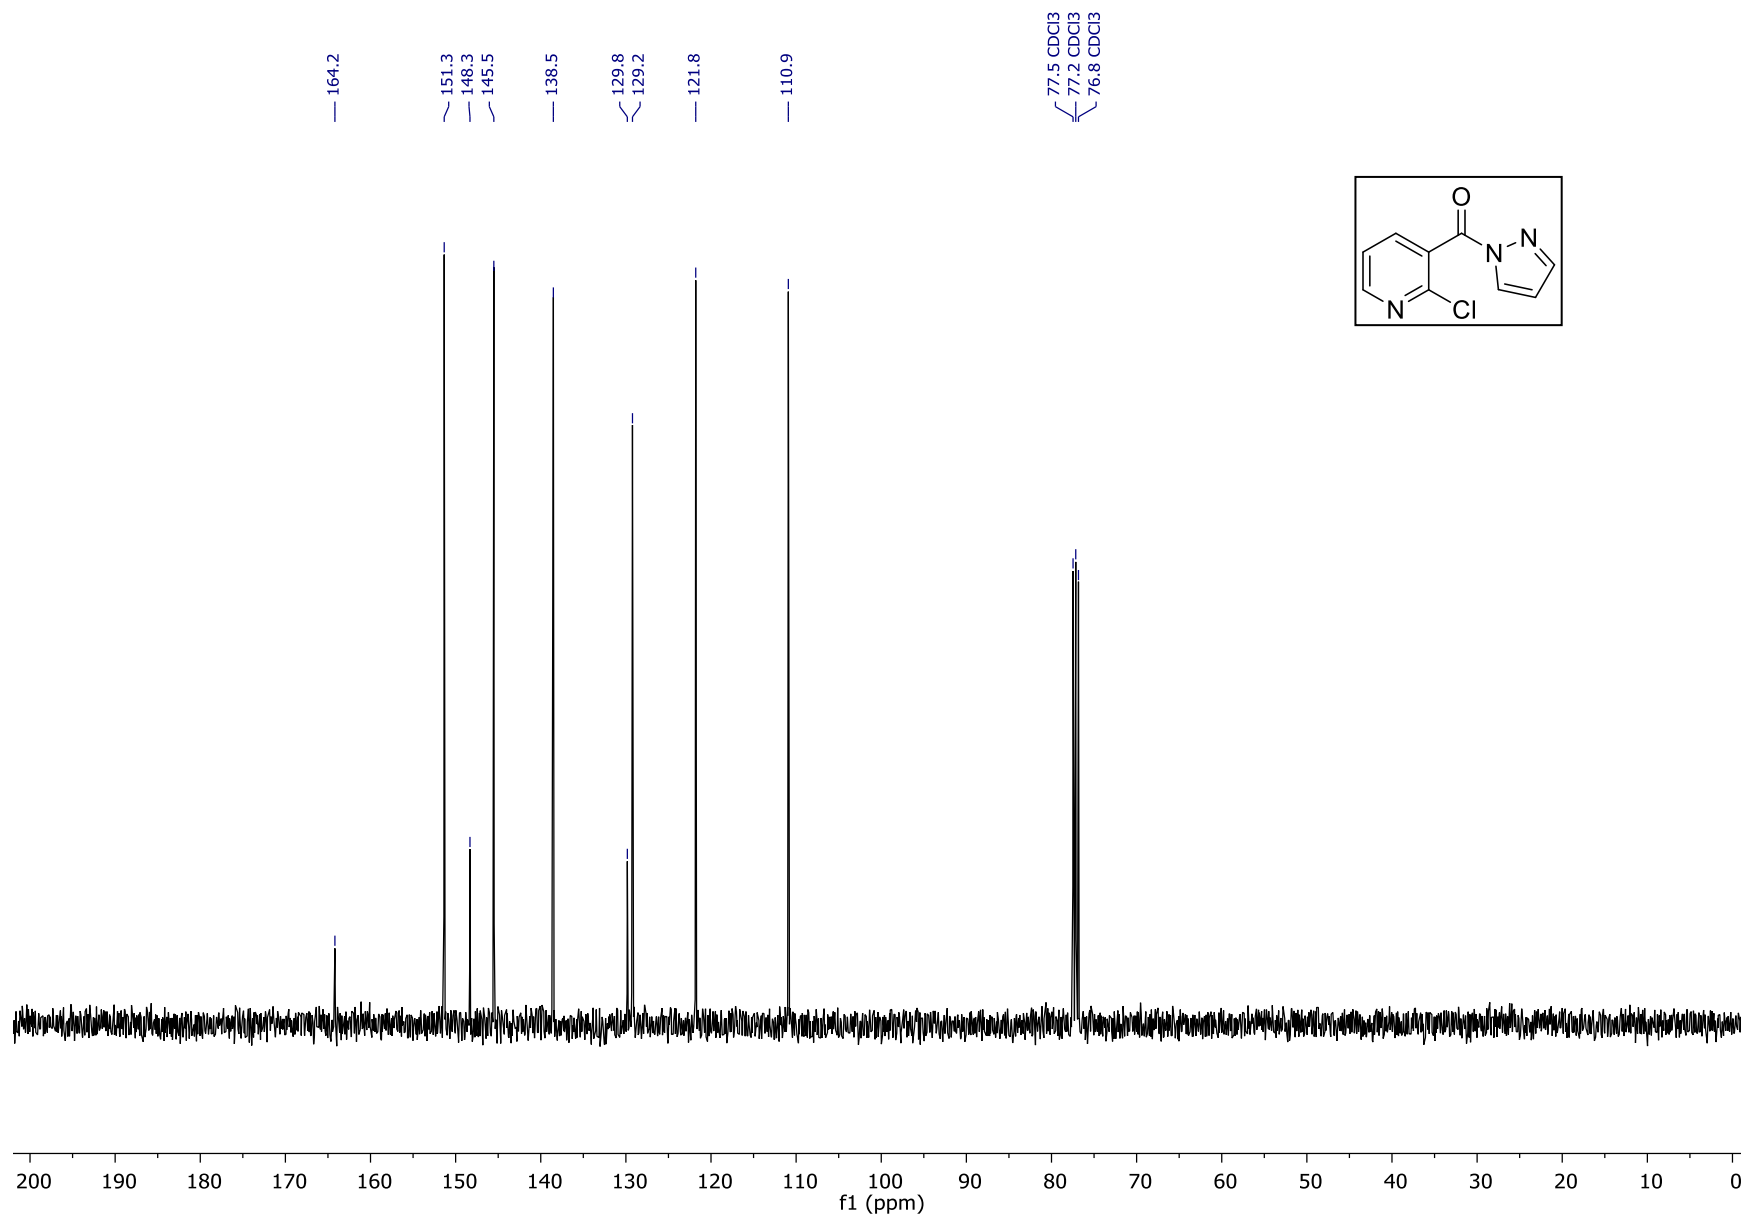

**<sup>13</sup>C-NMR (101 MHz CDCl<sub>3</sub>) (2-Chloroquinolin-3-yl)(1H-pyrazol-1-yl)methanone (7t)**

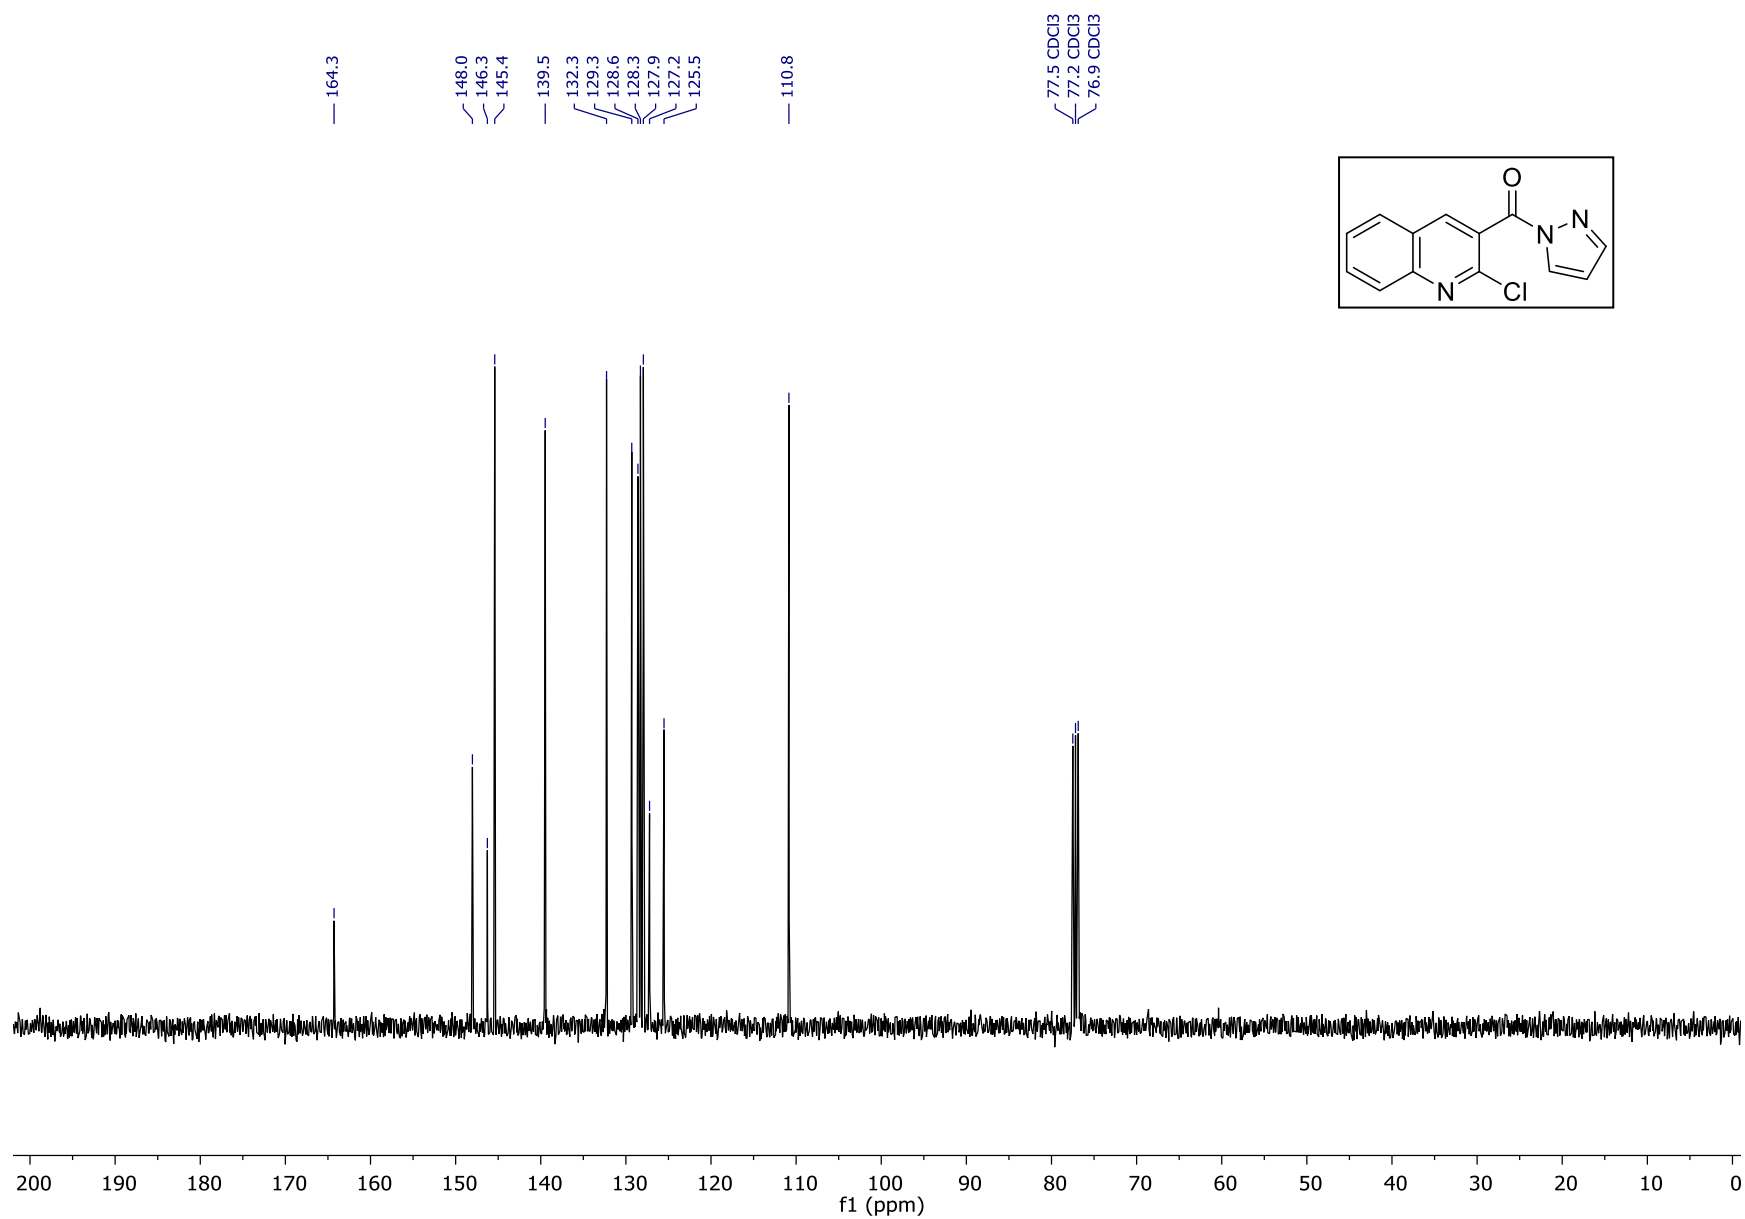



<sup>13</sup>C-NMR (101 MHz CDCl<sub>3</sub>) (5-bromothiophen-2-yl)(1H-pyrazol-1-yl)methanone (7u)

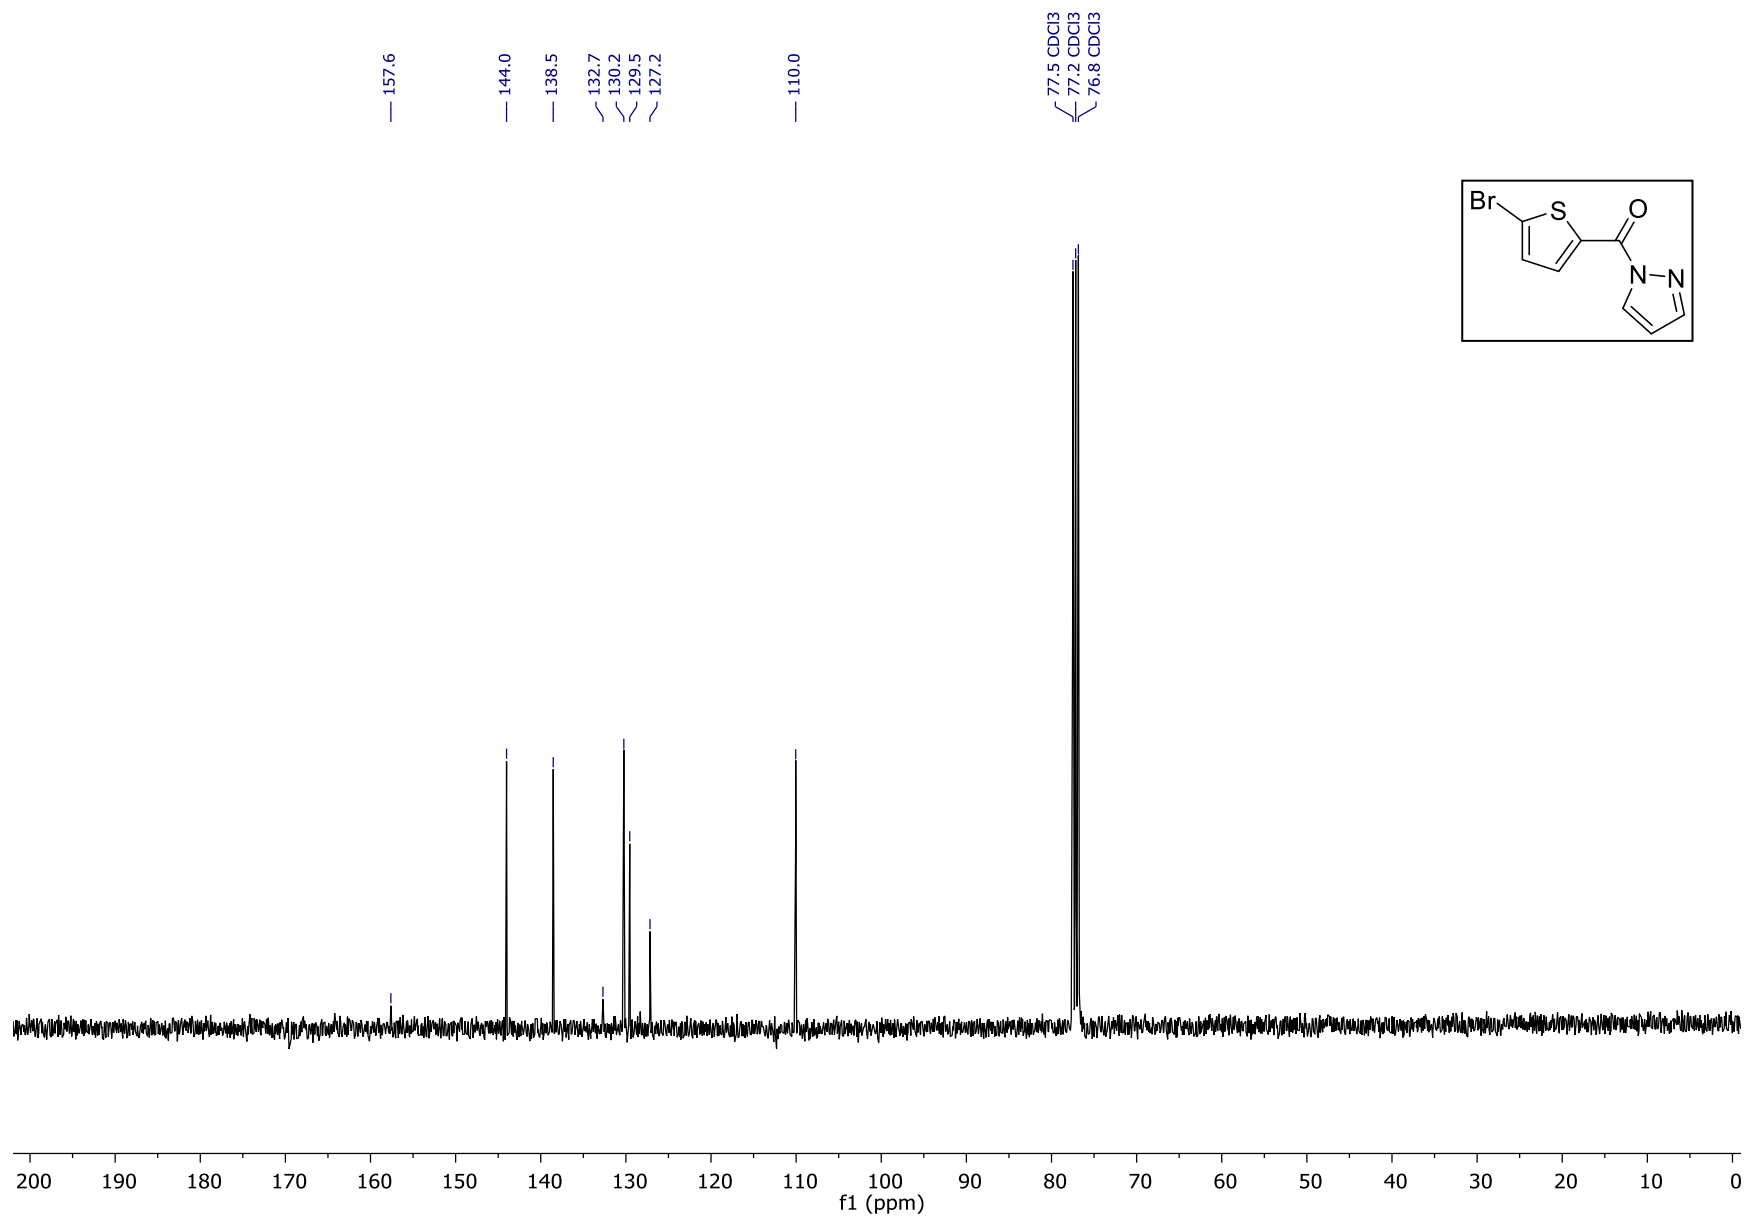

<sup>13</sup>C-NMR (101 MHz CDCl<sub>3</sub>) (5-bromofuran-2-yl)(1H-pyrazol-1-yl)methanone (7v)

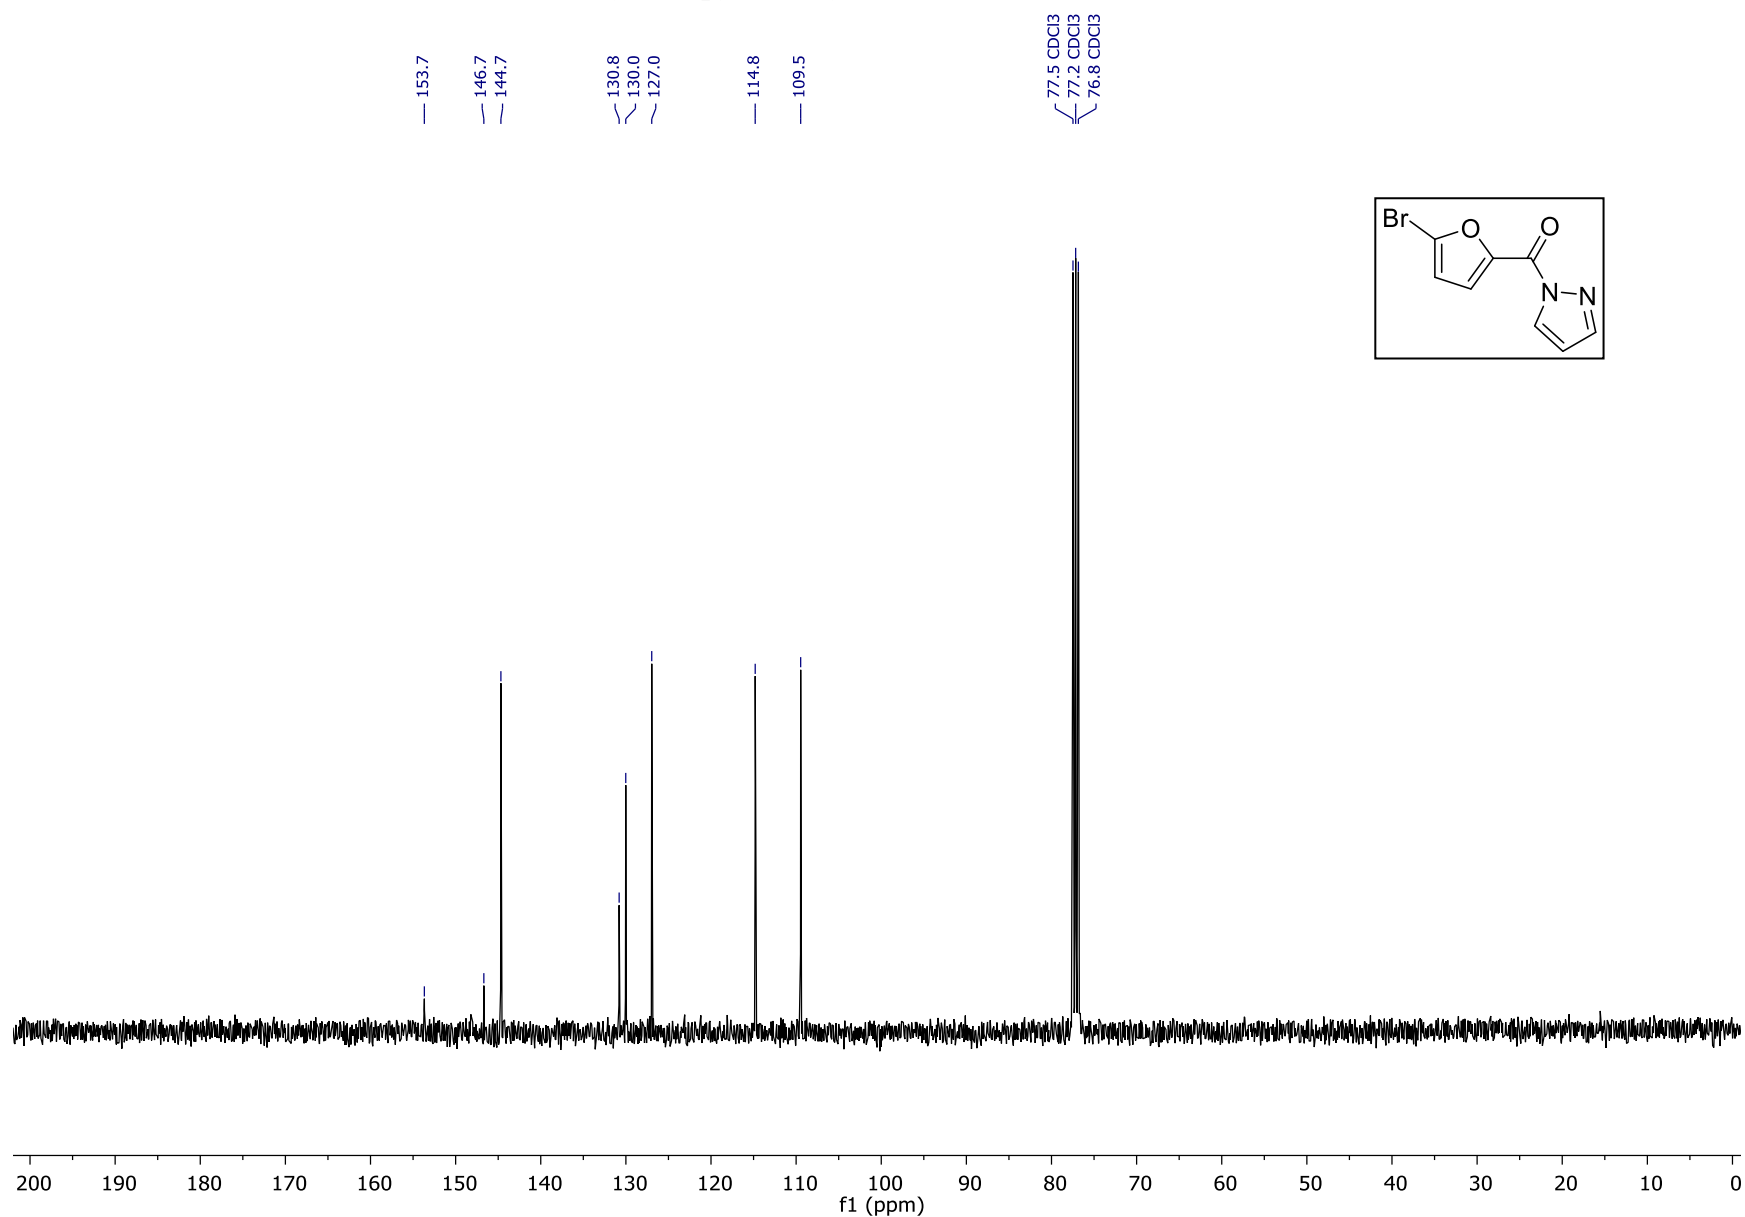

<sup>13</sup>C-NMR (101 MHz CDCl<sub>3</sub>) Cyclohexyl(1*H*-pyrazol-1-yl)methanone (7w)

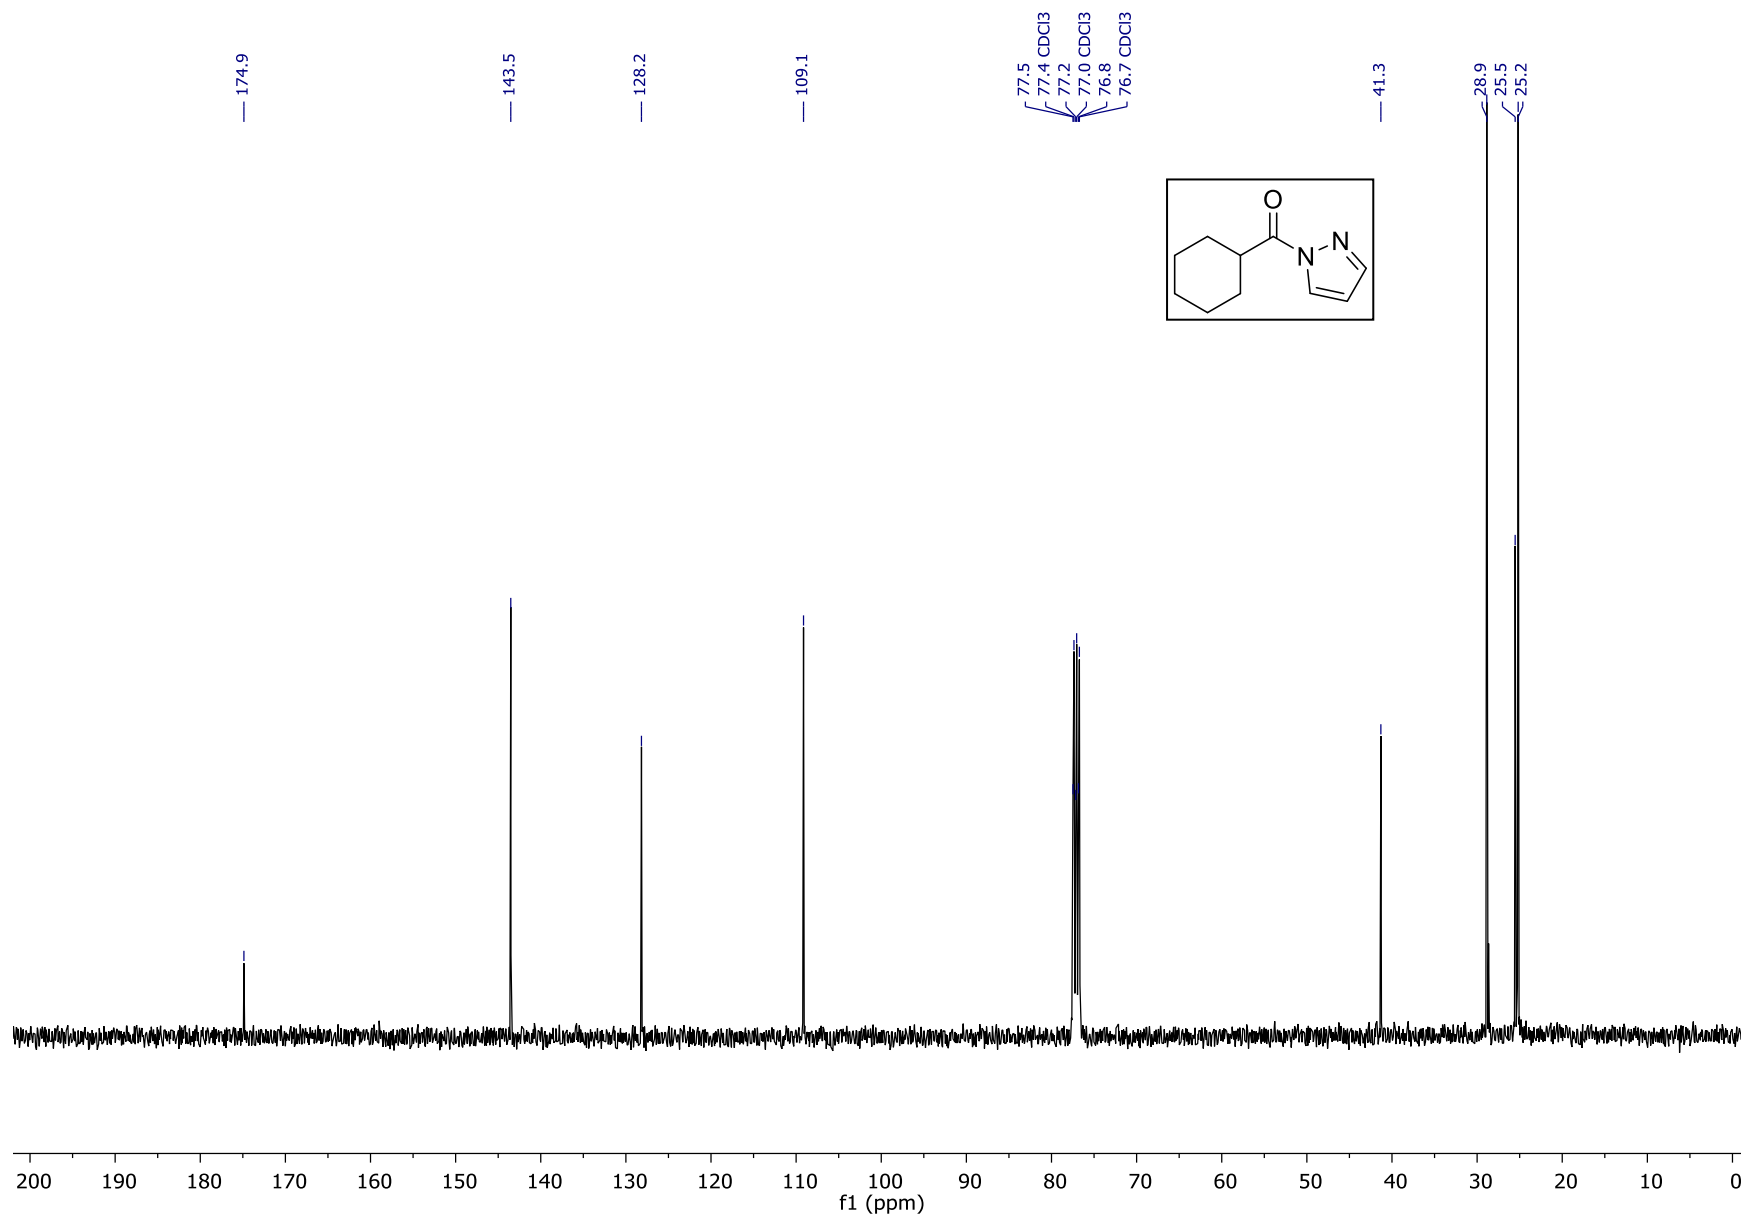

<sup>13</sup>C-NMR (101 MHz CDCl<sub>3</sub>) 3-phenyl-1-(1*H*-pyrazol-1-yl)prop-2-yn-1-one (7z)

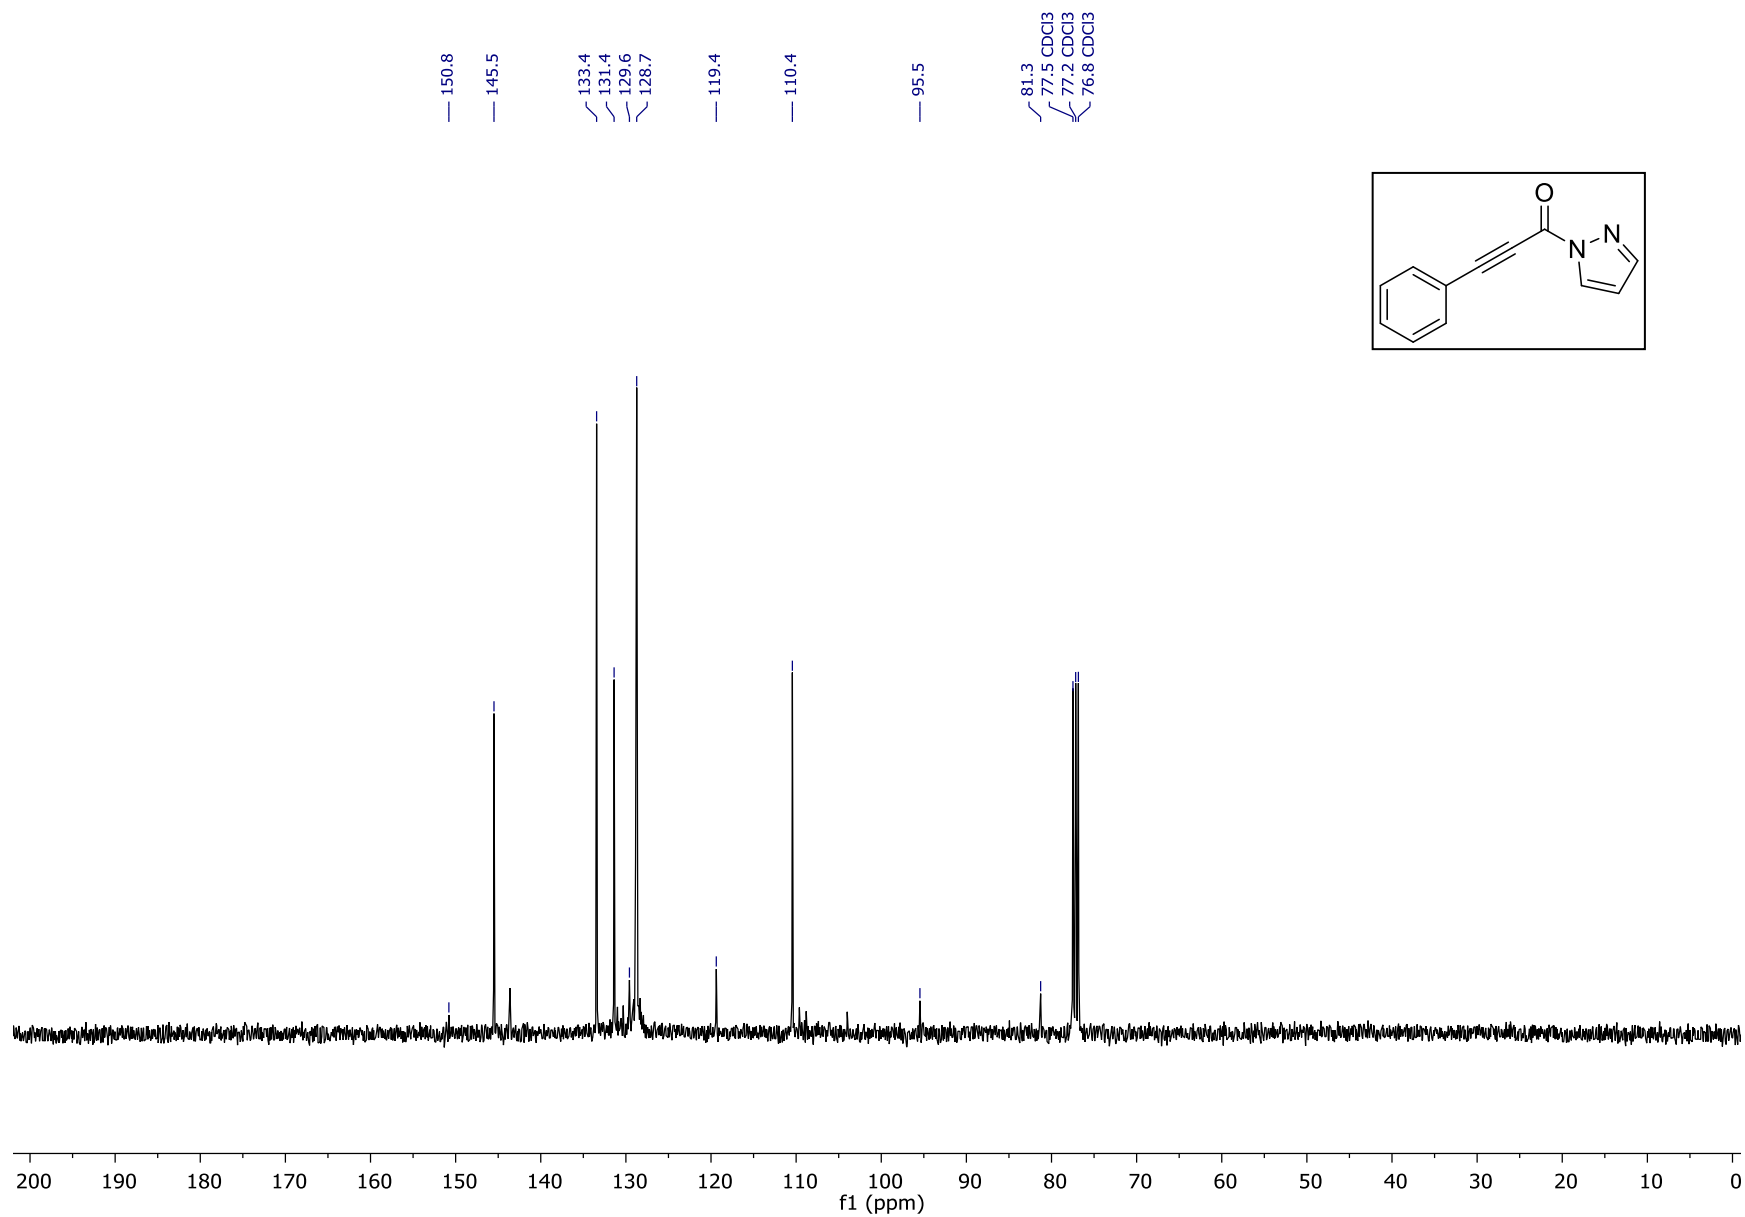

<sup>13</sup>C-NMR (101 MHz CDCl<sub>3</sub>) *p*-Tolyl(2*H*-1,2,3-triazol-2-yl)methanone (7ae)

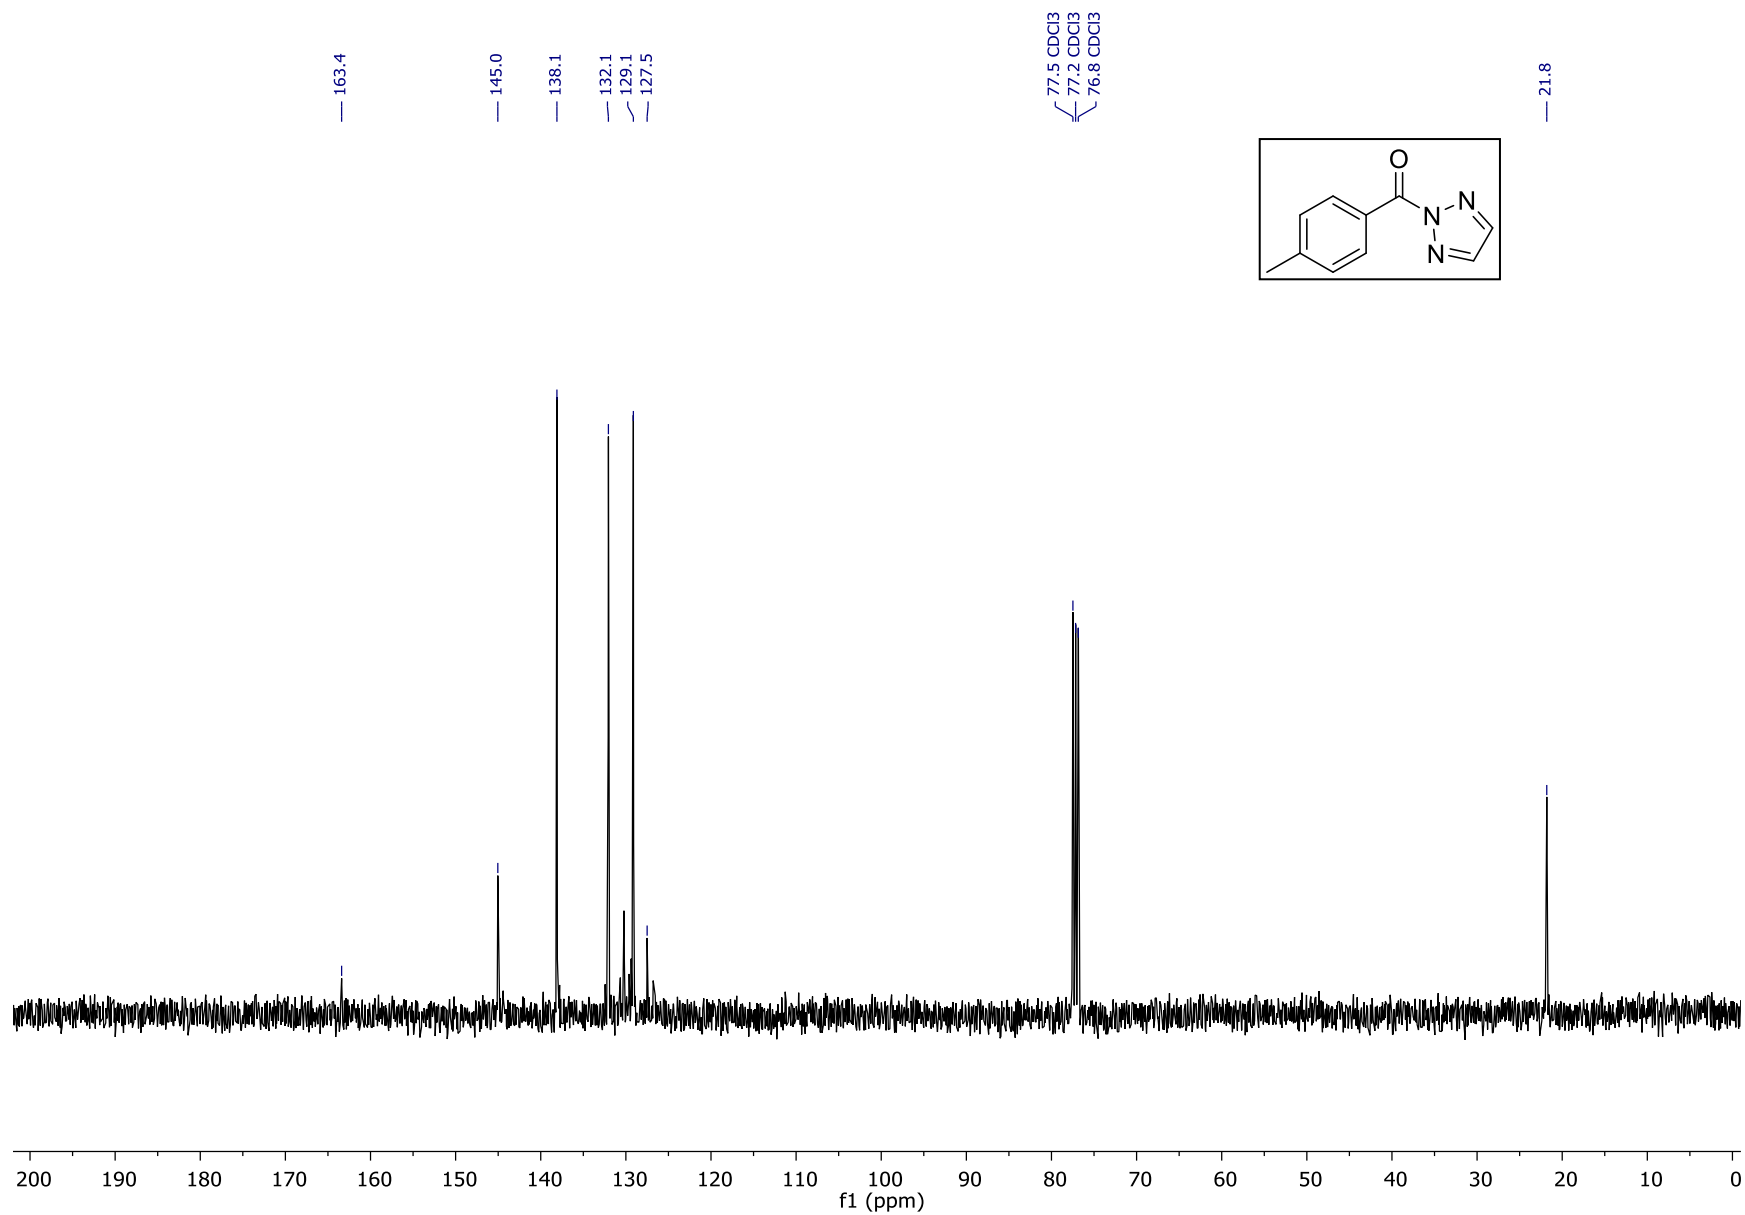

<sup>13</sup>C-NMR (101 MHz CDCl<sub>3</sub>) 3-(1*H*-pyrazol-1-yl)isobenzofuran-1(3*H*)-one (7ai)

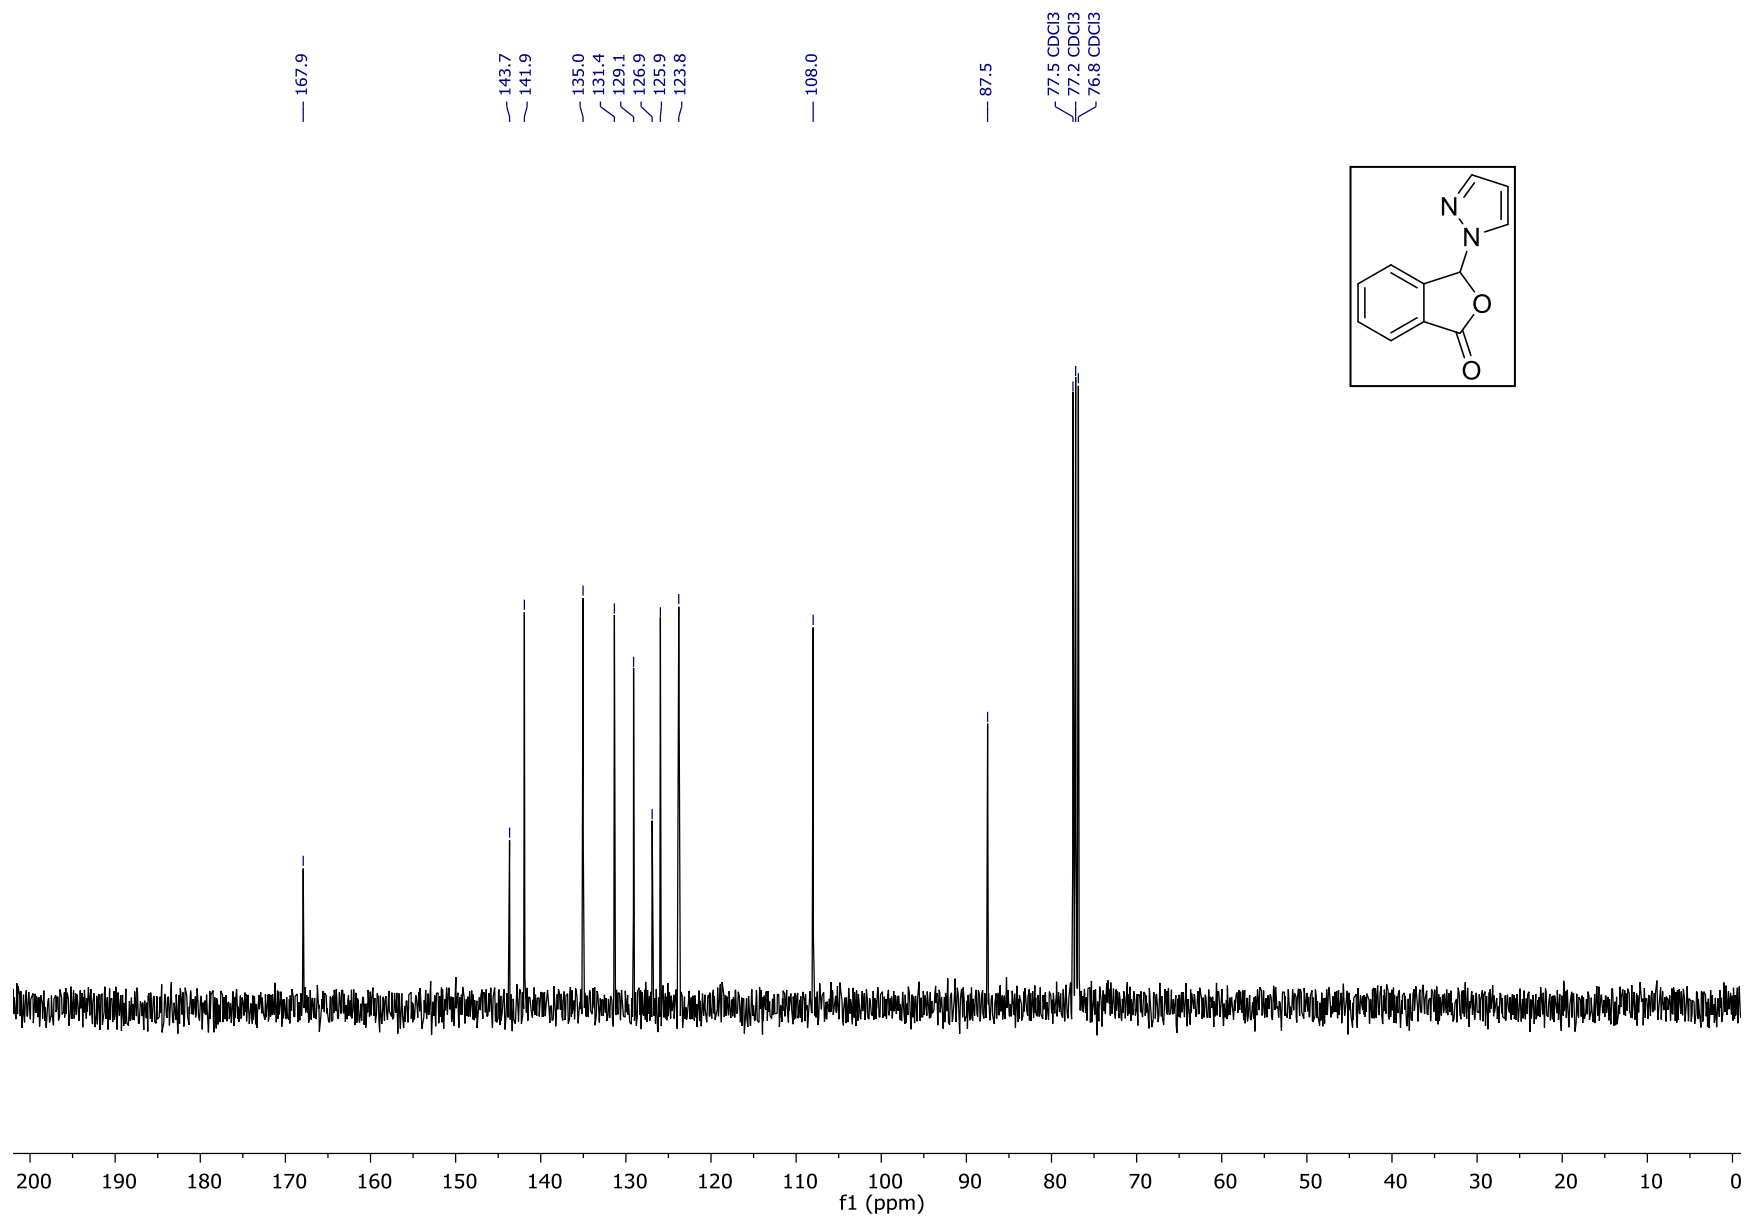

<sup>13</sup>C-NMR (101 MHz CDCl<sub>3</sub>) 1,4-phenylenebis((1*H*-pyrazol-1-yl)methanone) (7aj)

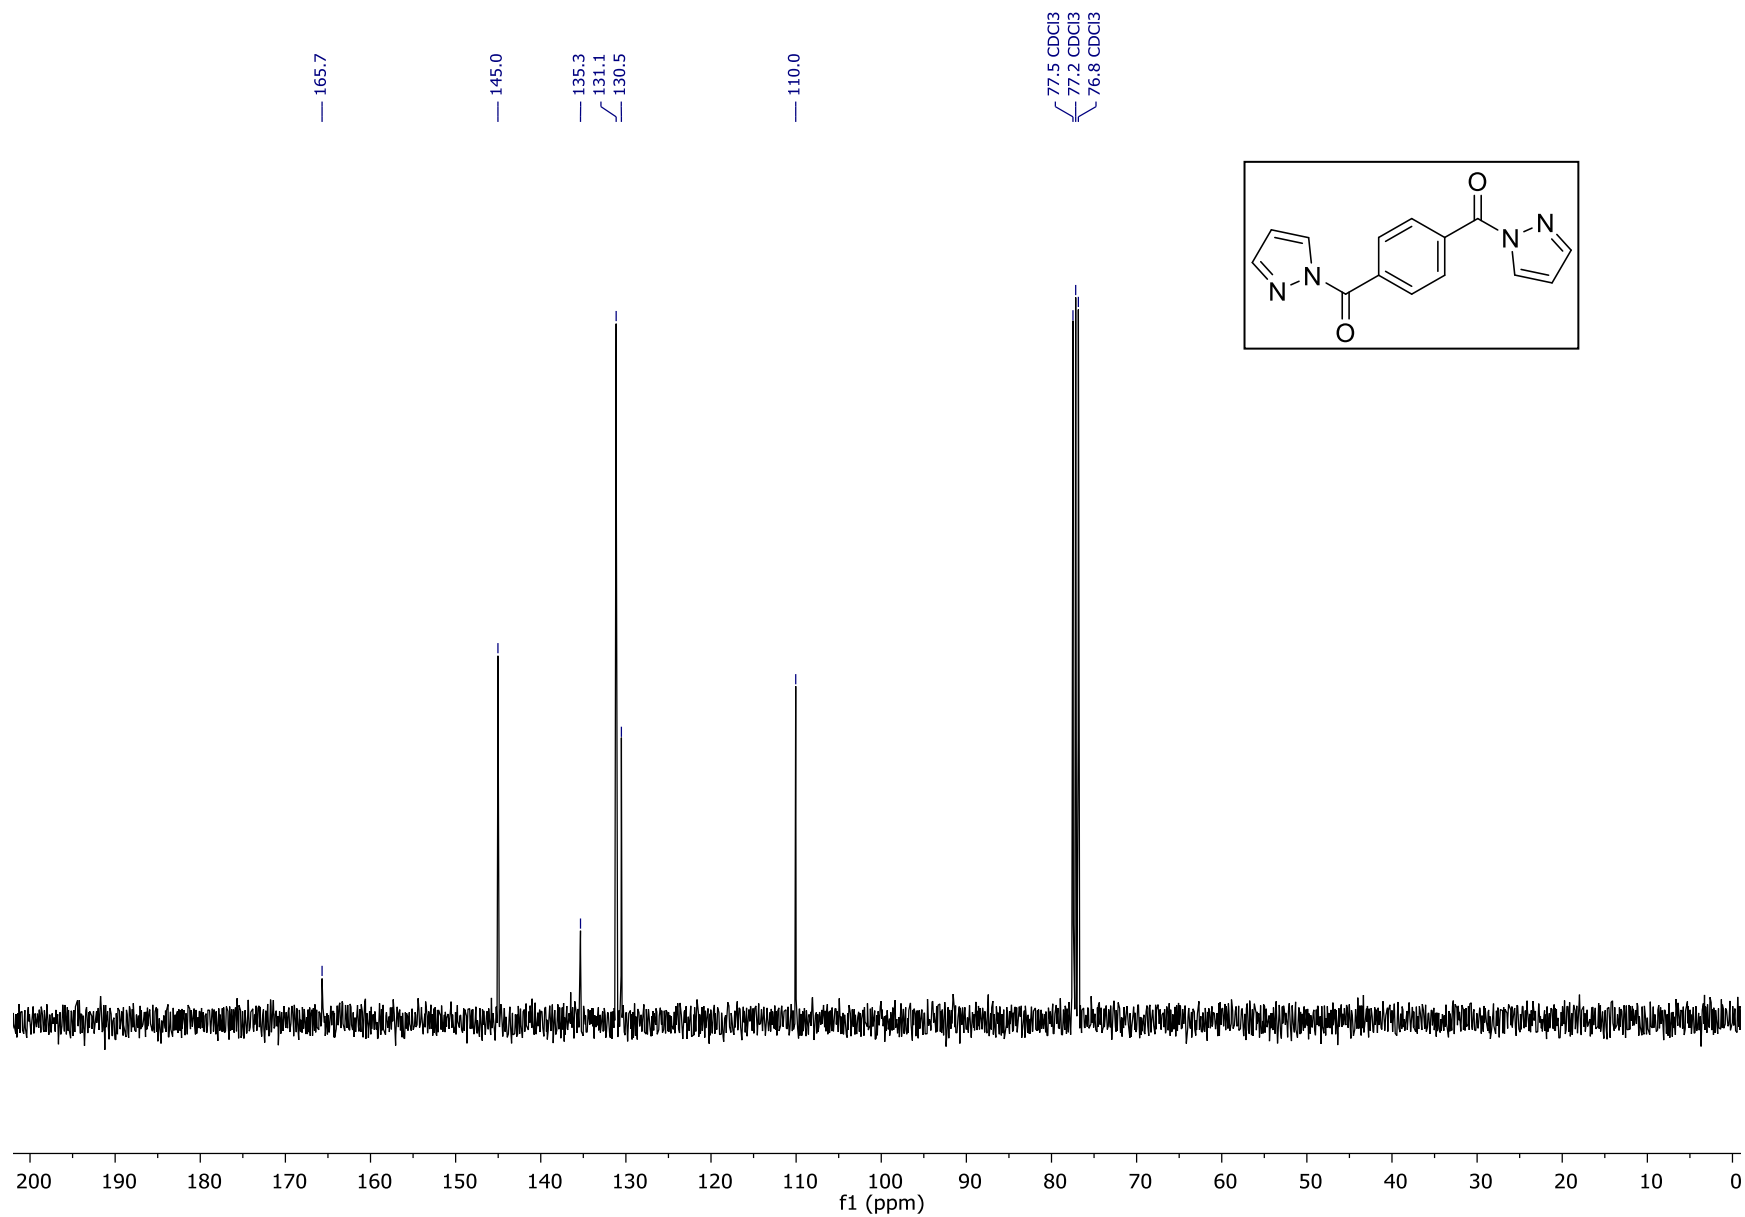

**<sup>19</sup>F-NMR (376 MHz CDCl<sub>3</sub>) (4-Fluorophenyl)(1*H*-pyrazol-1-yl)methanone (7b)**

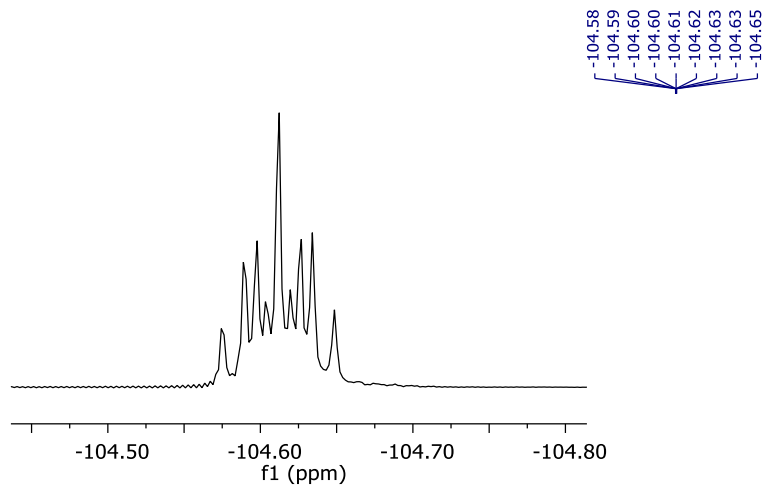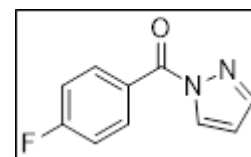

— -161.64 C6F6

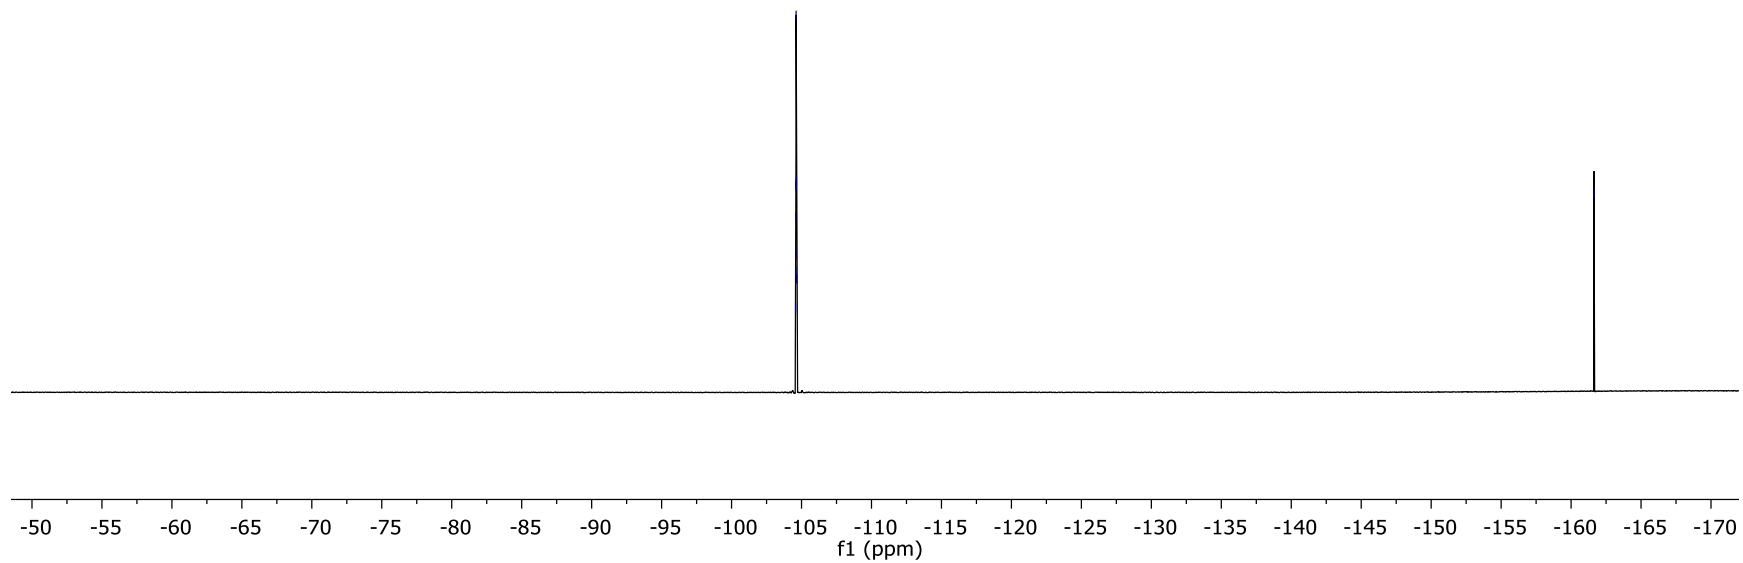



<sup>19</sup>F-NMR (376 MHz CDCl<sub>3</sub>) (1*H*-Pyrazol-1-yl)(4-(trifluoromethyl)phenyl)methanone (7f)

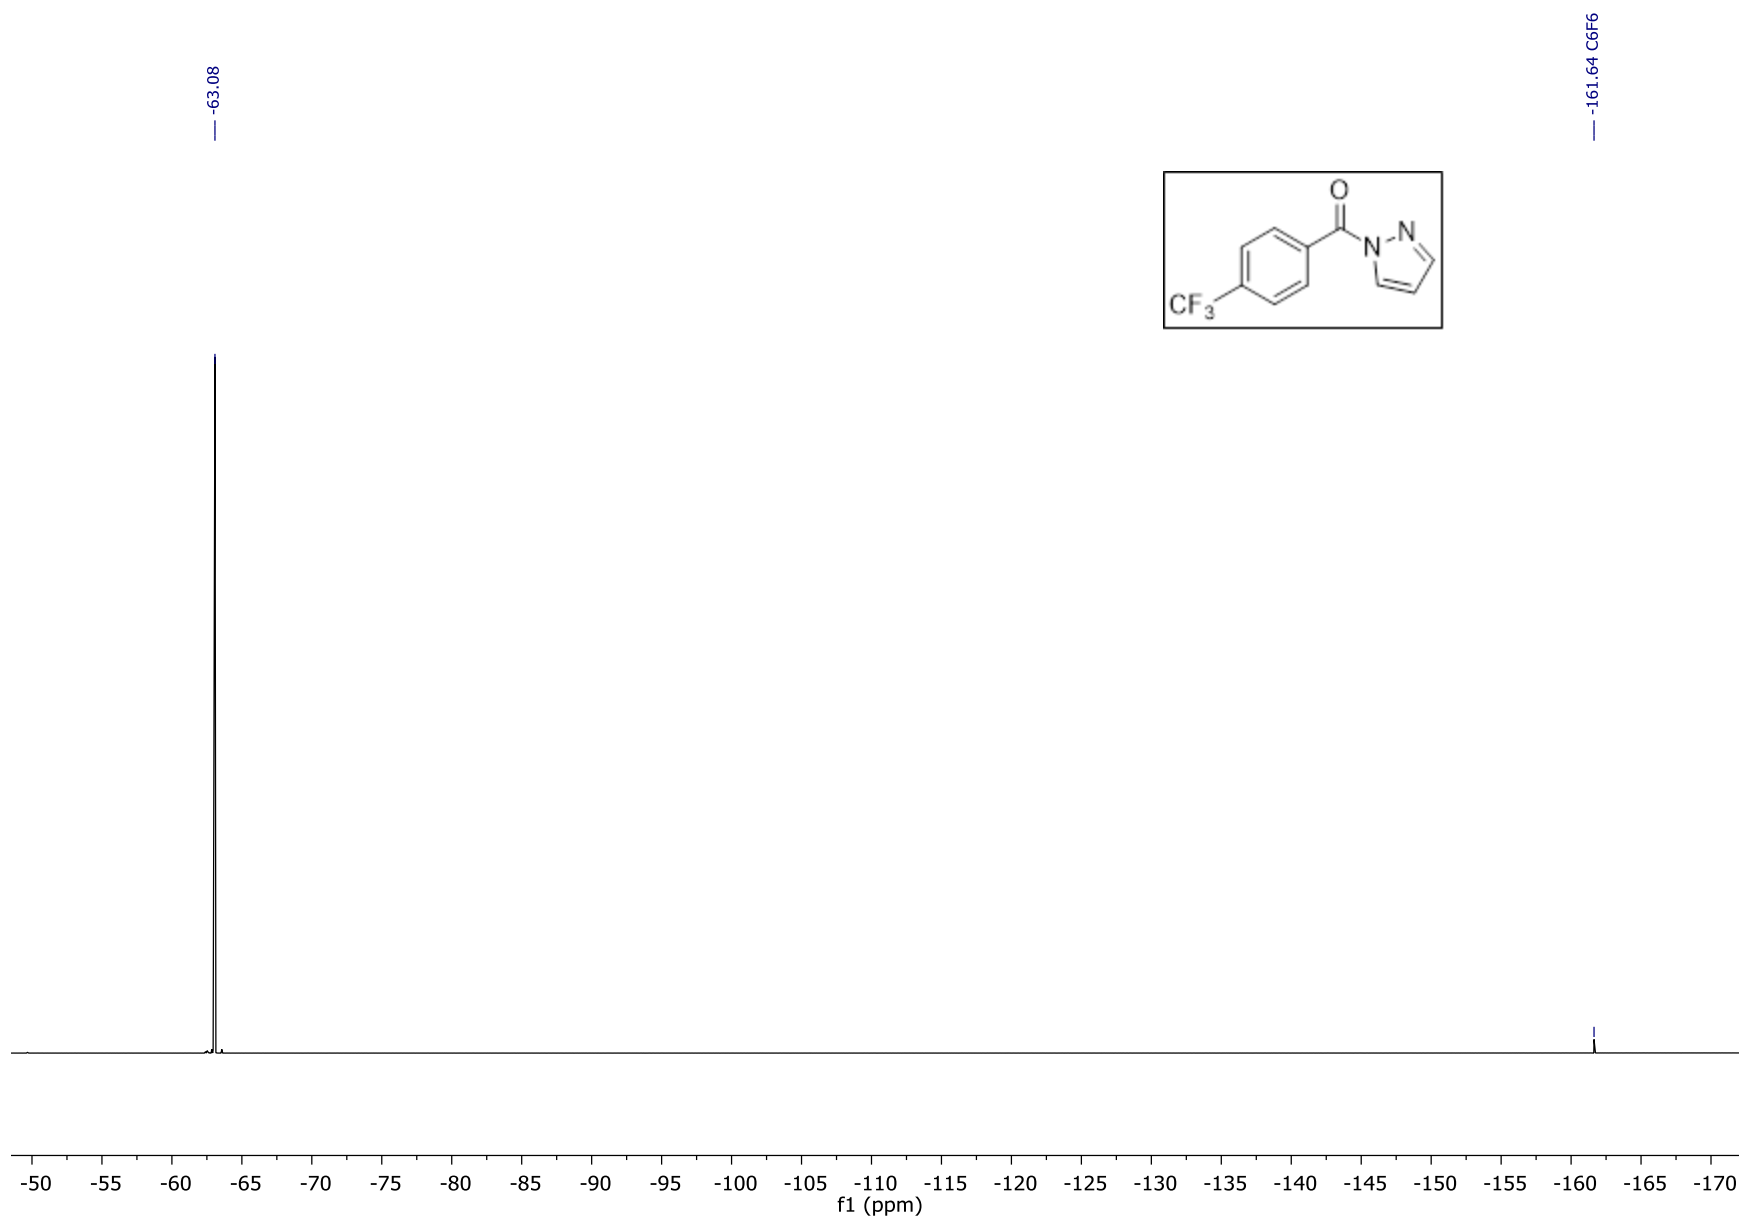

**<sup>19</sup>F-NMR (376 MHz CDCl<sub>3</sub>) (2-Fluorophenyl)(1H-pyrazol-1-yl)methanone (7m)**

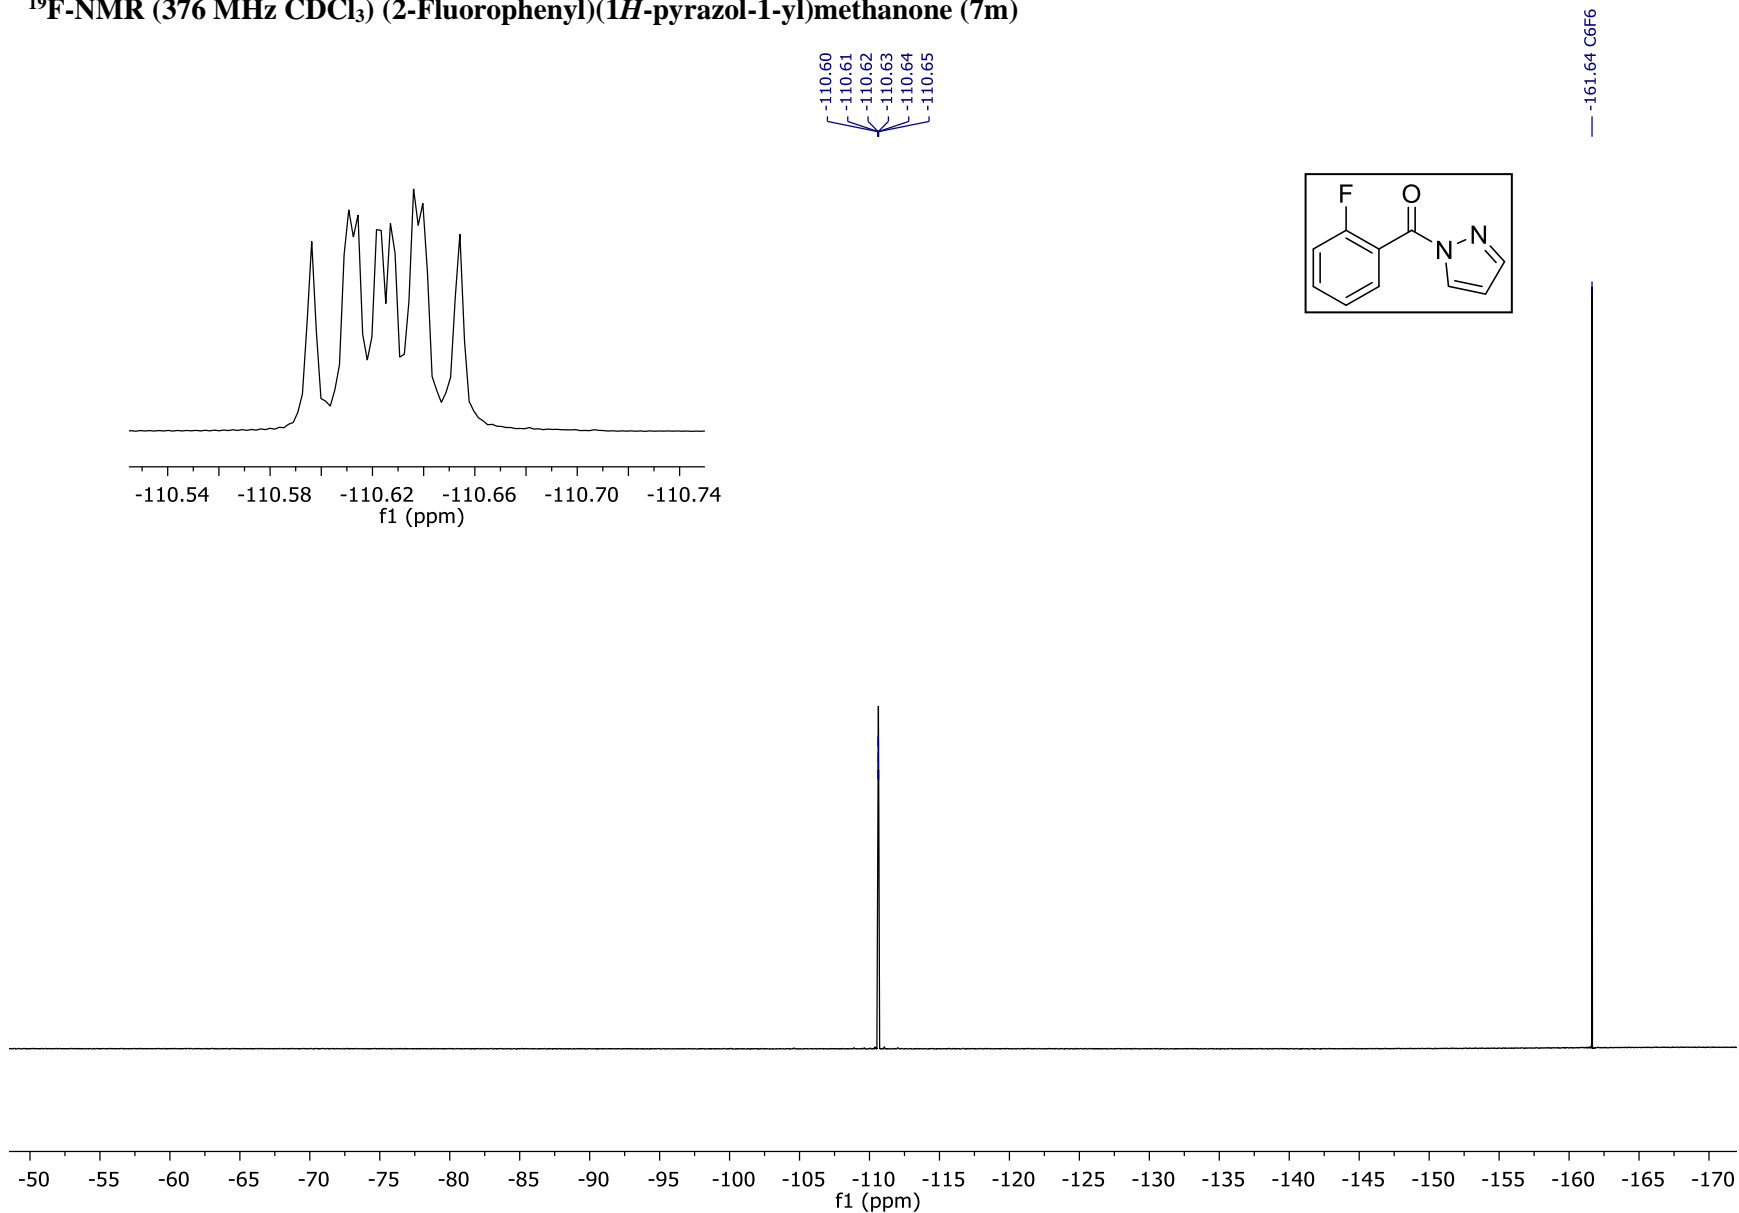

**<sup>19</sup>F-NMR (376 MHz CDCl<sub>3</sub>) (2-Bromo-4-fluorophenyl)(1H-pyrazol-1-yl)methanone (7q)**

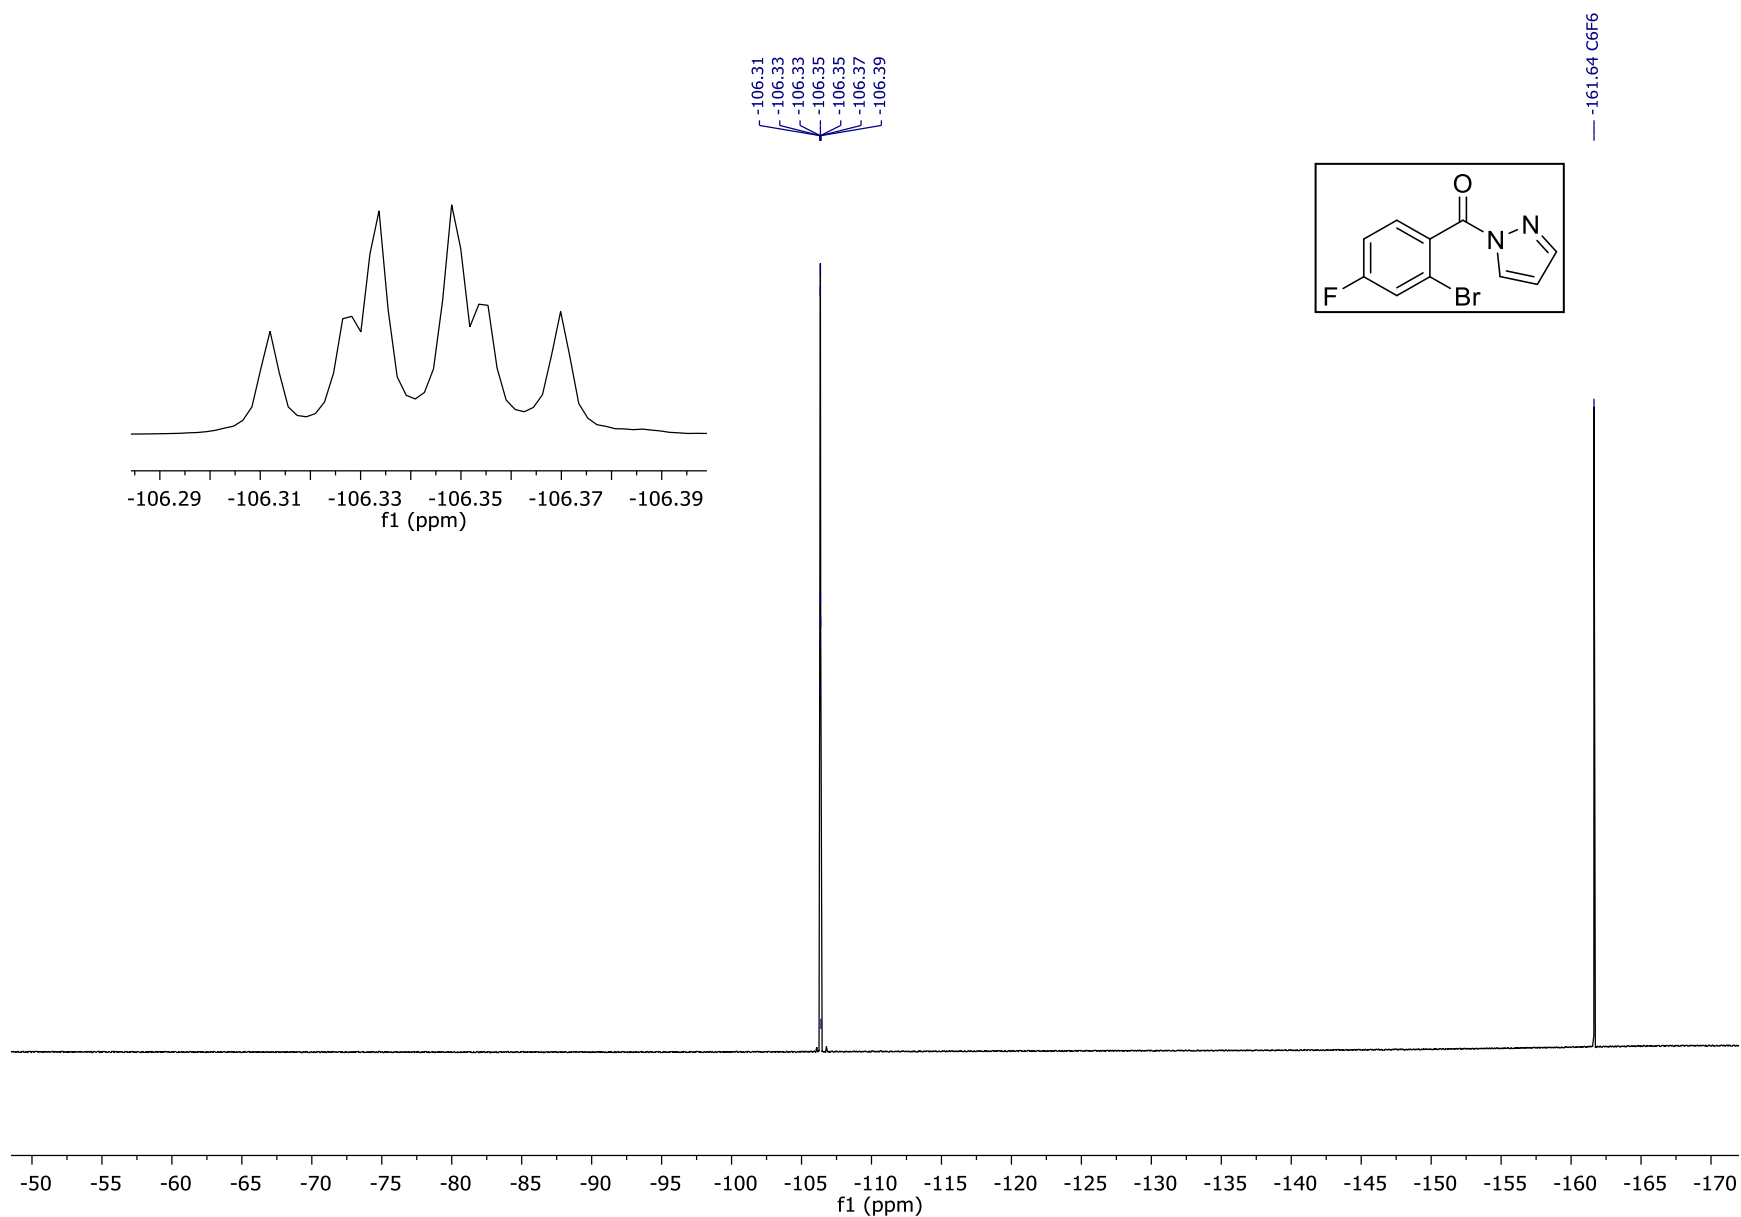

# Gas Chromatograms

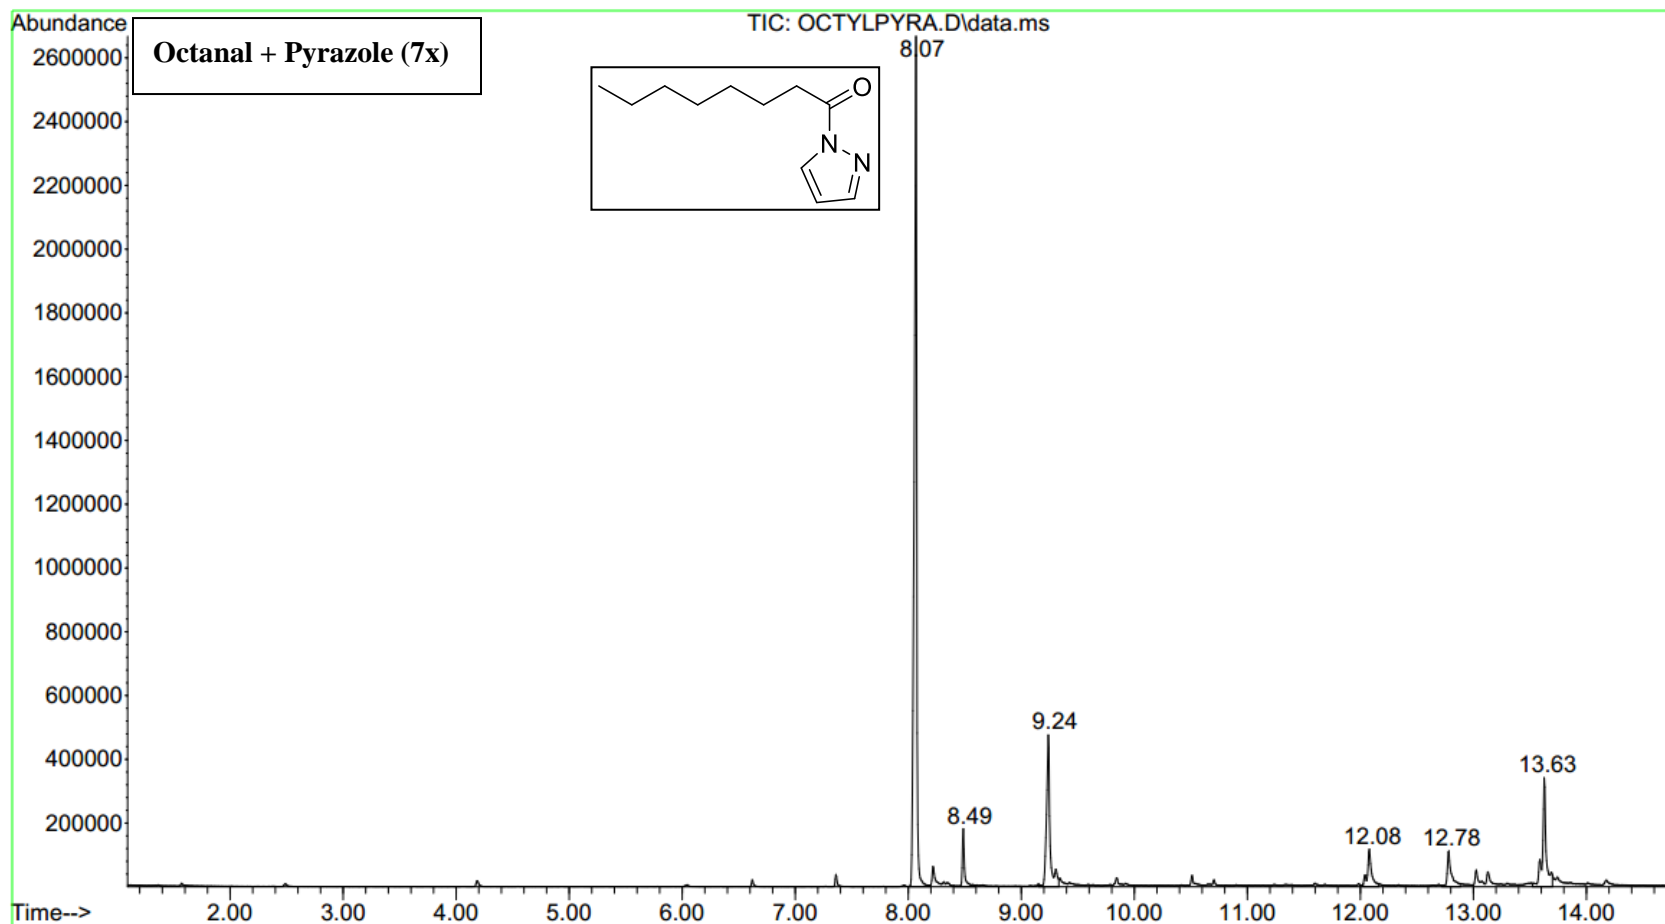

| No. | Peak MW | Ret. time (min) | Area (mAU*min) | Height (mAU) | Identity | % of total |
|-----|---------|-----------------|----------------|--------------|----------|------------|
| 1   | 194     | 8.067           | 40263964       | 2602505      | Product  | 67.362     |
| 2   | 191     | 8.486           | 2090112        | 171966       | Unknown  | 3.497      |
| 3   | 213     | 9.241           | 7694454        | 443592       | ACT      | 12.873     |
| 4   | 233     | 12.081          | 2118774        | 109562       | Unknown  | 3.545      |
| 5   | 213     | 12.783          | 2173858        | 106036       | ACT      | 3.637      |
| 6   | 283     | 13.630          | 5431785        | 319058       | Unknown  | 9.087      |

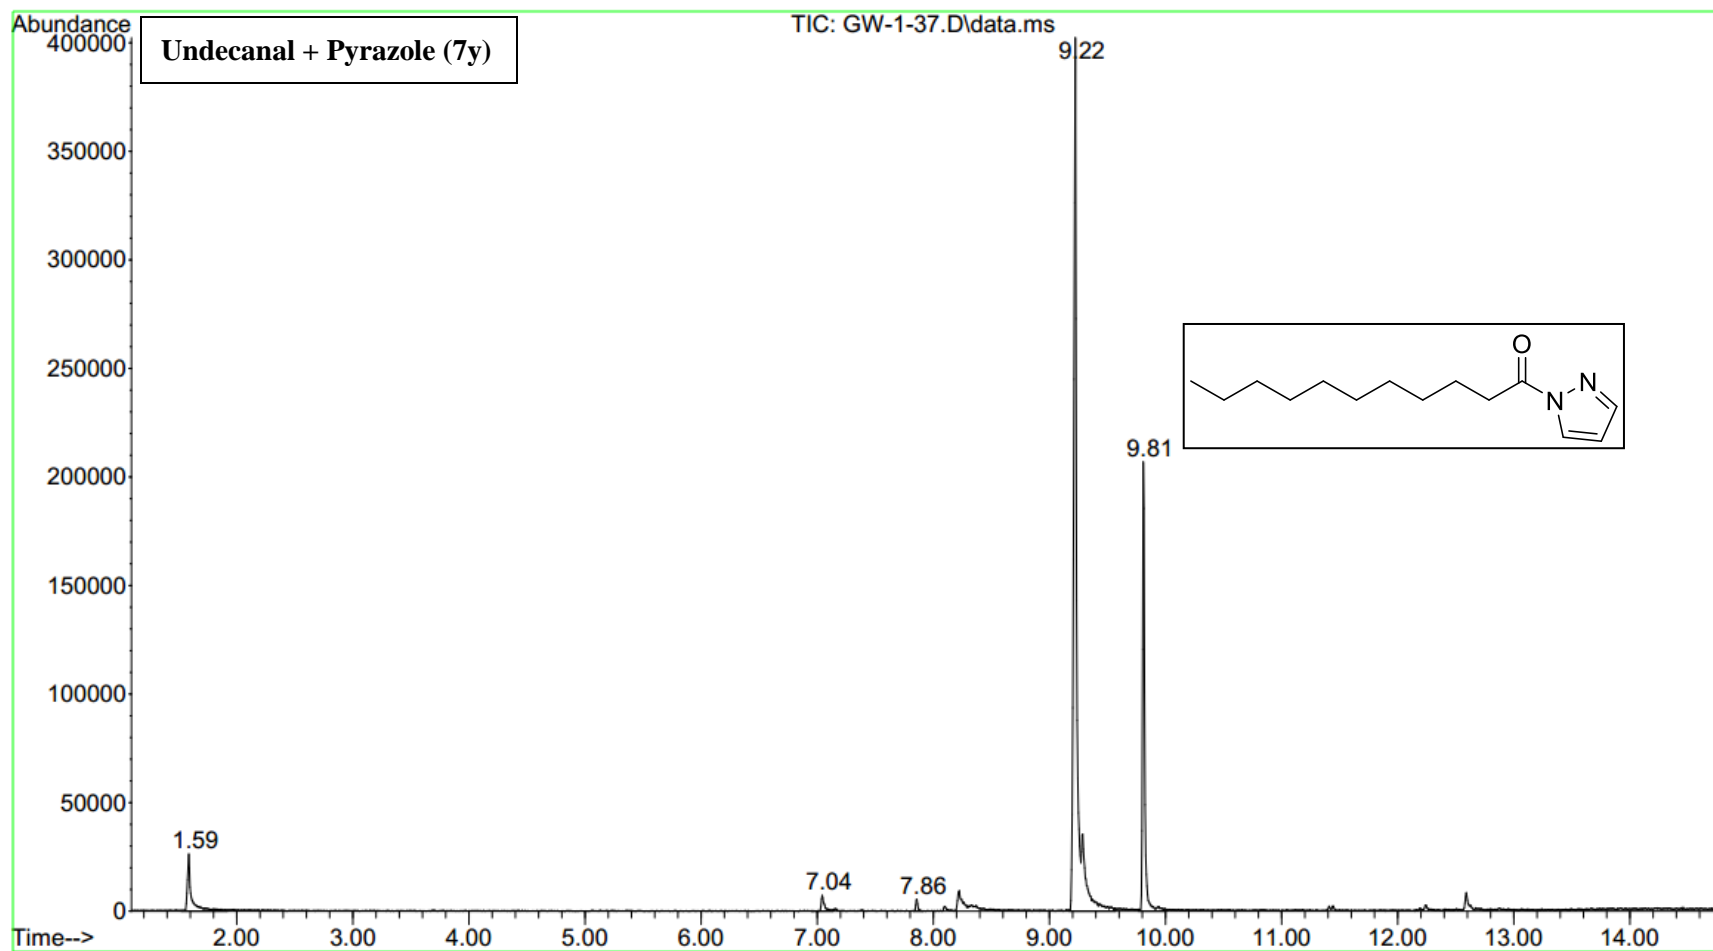

| No. | Peak MW | Ret. time (min) | Area (mAU*min) | Height (mAU) | Identity                 | % of total |
|-----|---------|-----------------|----------------|--------------|--------------------------|------------|
| 1   | 68      | 1.586           | 651866         | 26372        | 1H-Pyrazole              | 5.793      |
| 2   | 170     | 7.043           | 142359         | 7331         | Starting Material        | 1.265      |
| 3   | 200     | 7.856           | 66929          | 5653         | Methyl Ester from quench | .595       |
| 4   | 213     | 9.222           | 7739569        | 404116       | ACT                      | 68.777     |
| 5   | 236     | 9.809           | 2652341        | 211917       | Product                  | 23.570     |

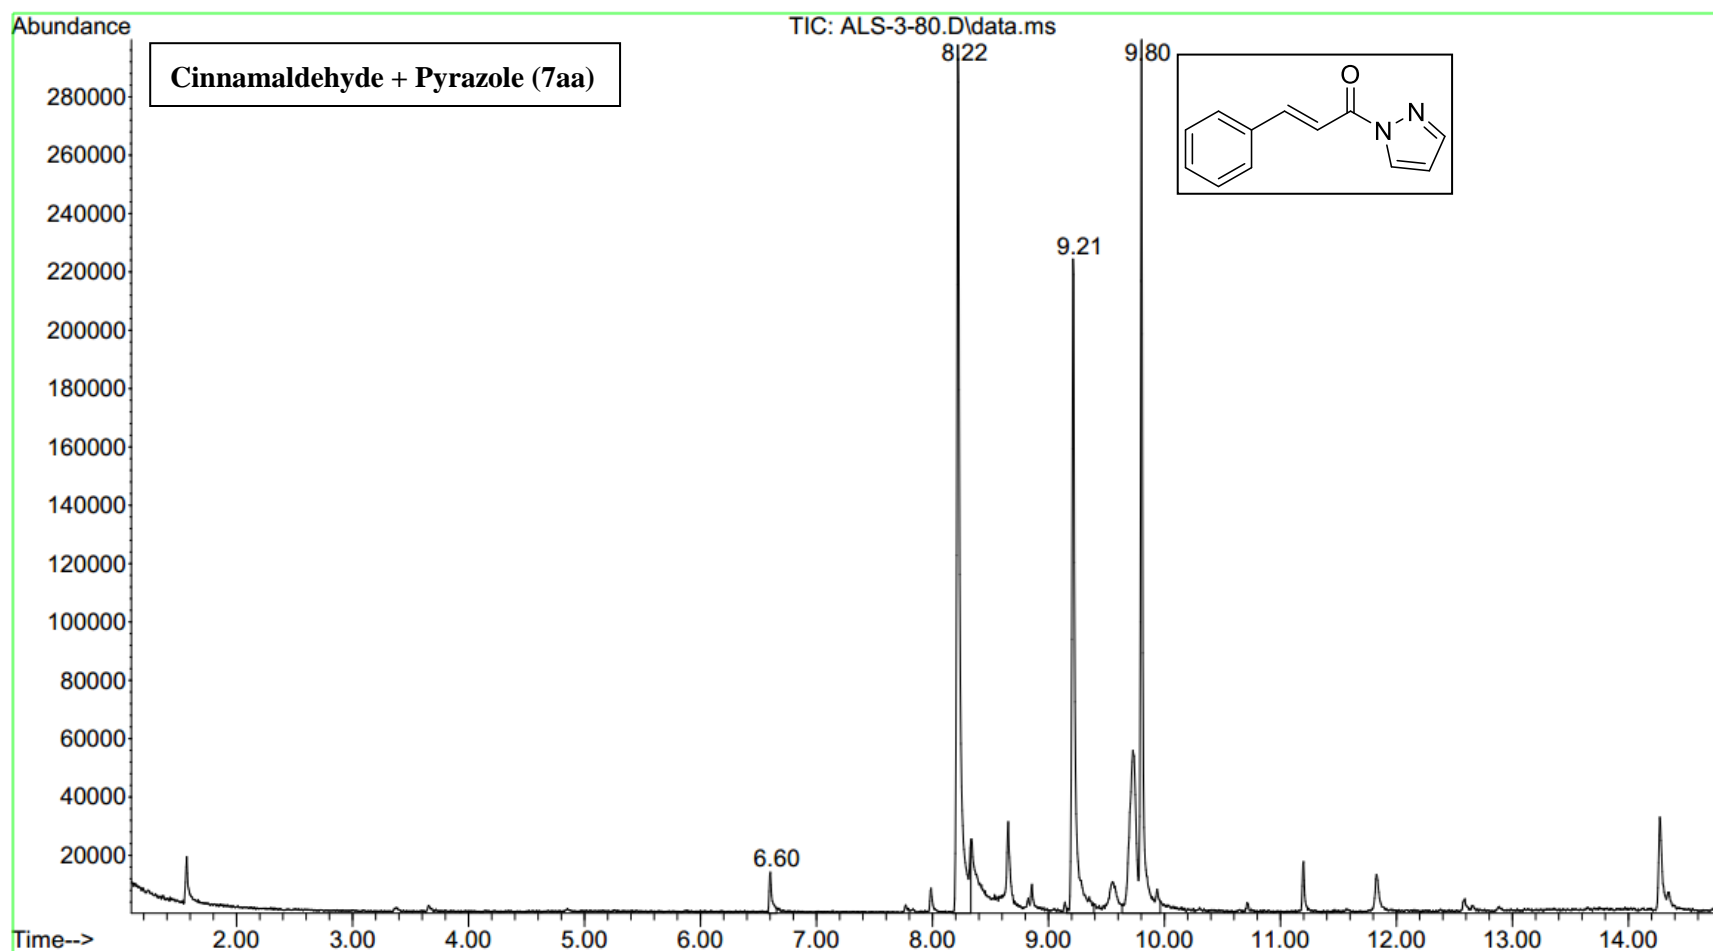

| No. | Peak MW | Ret. time (min) | Area (mAU*min) | Height (mAU) | Identity                  | % of total |
|-----|---------|-----------------|----------------|--------------|---------------------------|------------|
| 1   | 132     | 6.600           | 232572         | 14300        | Starting Material         | 1.446      |
| 2   | 198     | 8.220           | 5613489        | 303982       | Carboxylic acid byproduct | 34.907     |
| 3   | 213     | 9.214           | 4115998        | 230552       | ACT                       | 25.595     |
| 4   | 198     | 9.802           | 6119442        | 299670       | Product                   | 38.053     |

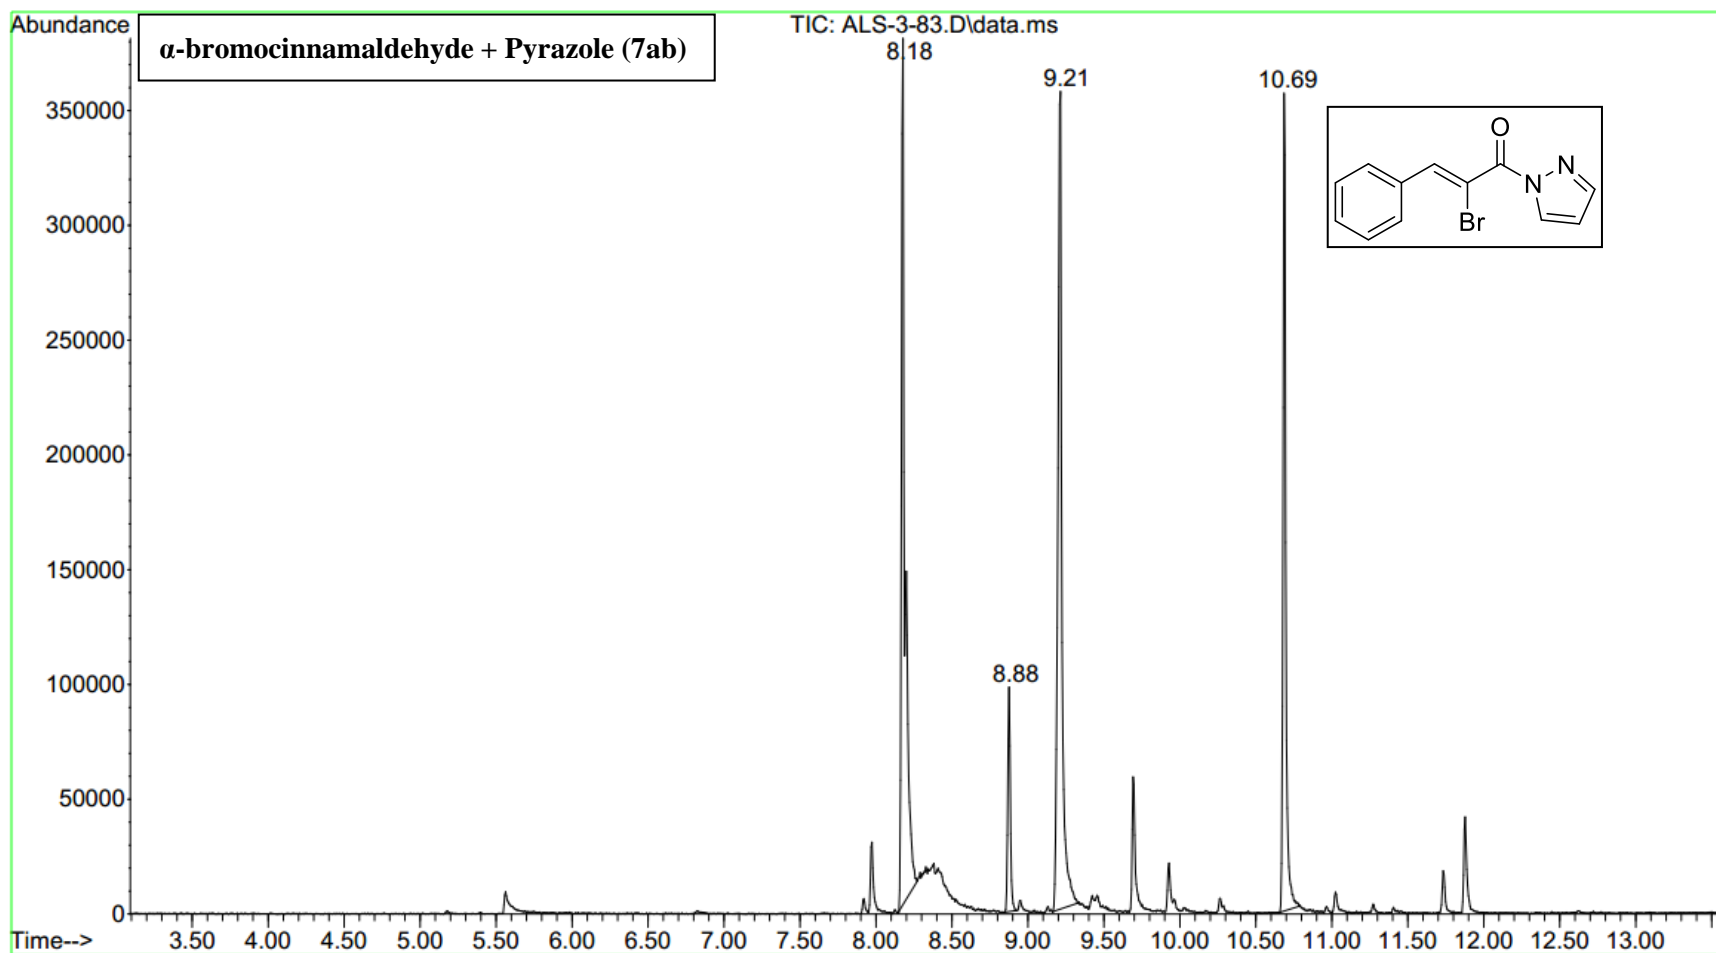

| No. | Peak MW | Ret. time (min) | Area (mAU*min) | Height (mAU) | Identity                  | % of total |
|-----|---------|-----------------|----------------|--------------|---------------------------|------------|
| 1   | 210     | 8.178           | 6119078        | 375320       | Starting Material         | 33.365     |
| 2   | 240     | 8.878           | 1124105        | 93093        | Carboxylic acid byproduct | 6.129      |
| 3   | 213     | 9.212           | 6578688        | 355311       | ACT                       | 35.871     |
| 4   | 276     | 10.689          | 4518029        | 349287       | Product                   | 24.635     |

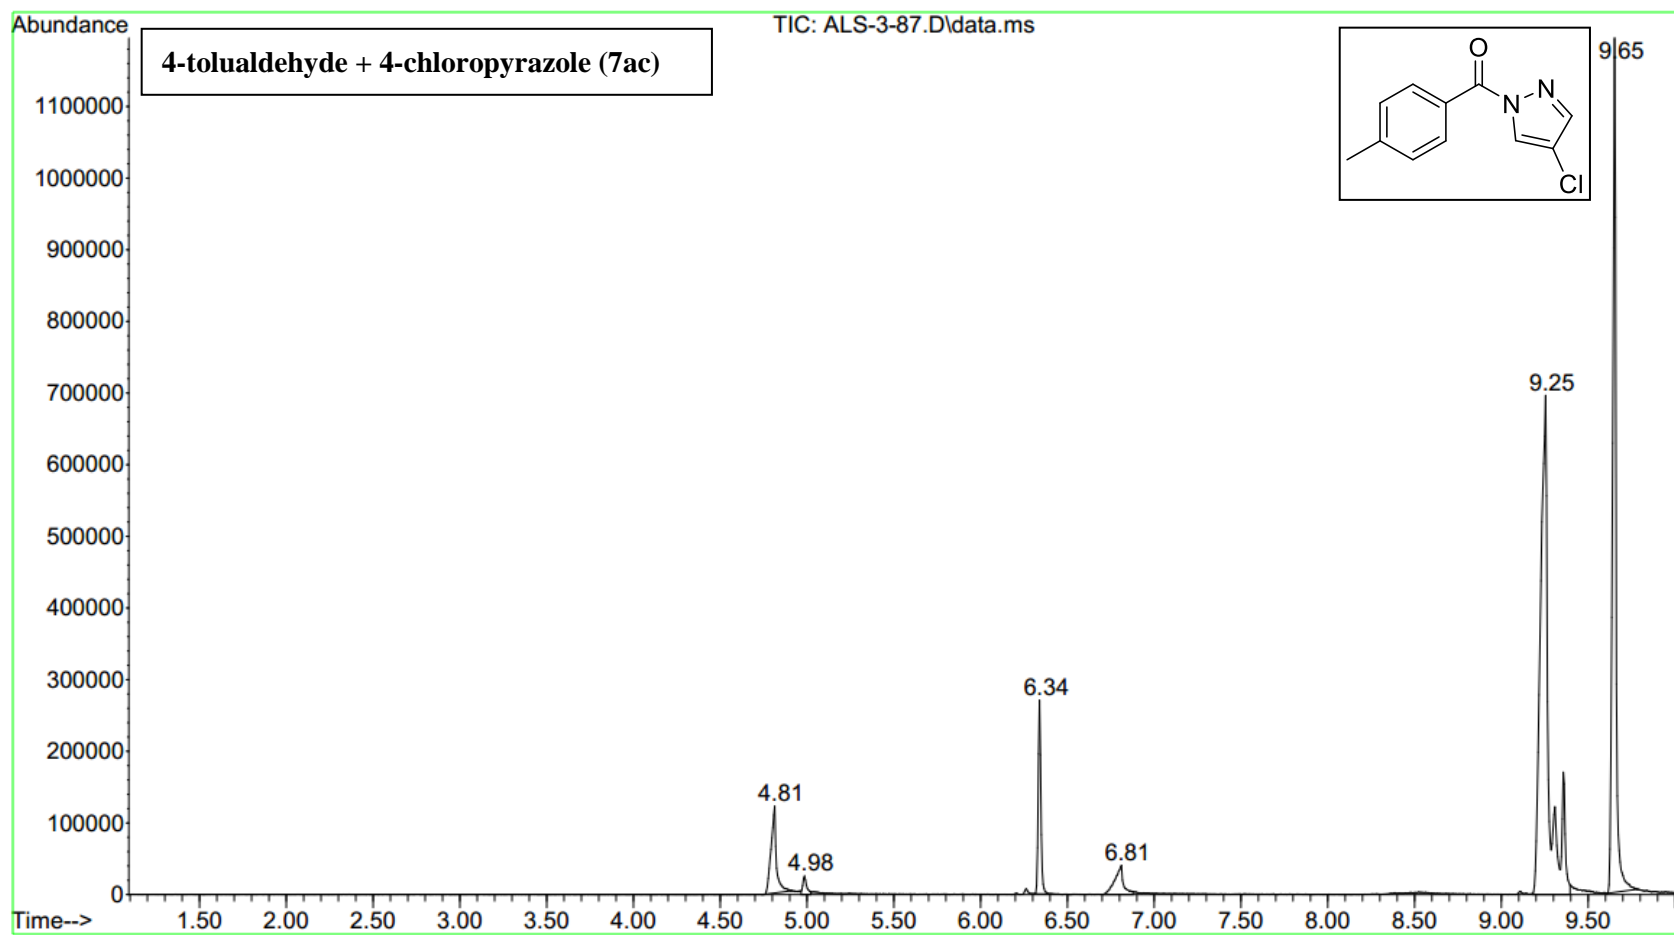

| No. | Peak MW | Ret. time (min) | Area (mAU*min) | Height (mAU) | Identity                  | % of total |
|-----|---------|-----------------|----------------|--------------|---------------------------|------------|
| 1   | 102     | 4.812           | 2560179        | 116261       | 4-chloropyrazole          | 5.469      |
| 2   | 120     | 4.985           | 404801         | 26022        | Starting Material         | 0.865      |
| 3   | 135     | 6.341           | 2848335        | 258018       | Unknown                   | 6.085      |
| 4   | 136     | 6.809           | 1411865        | 42764        | Carboxylic acid byproduct | 3.016      |
| 5   | 213     | 9.254           | 23187935       | 701158       | ACT                       | 49.538     |
| 6   | 220     | 9.654           | 16395472       | 1162371      | Product                   | 35.027     |



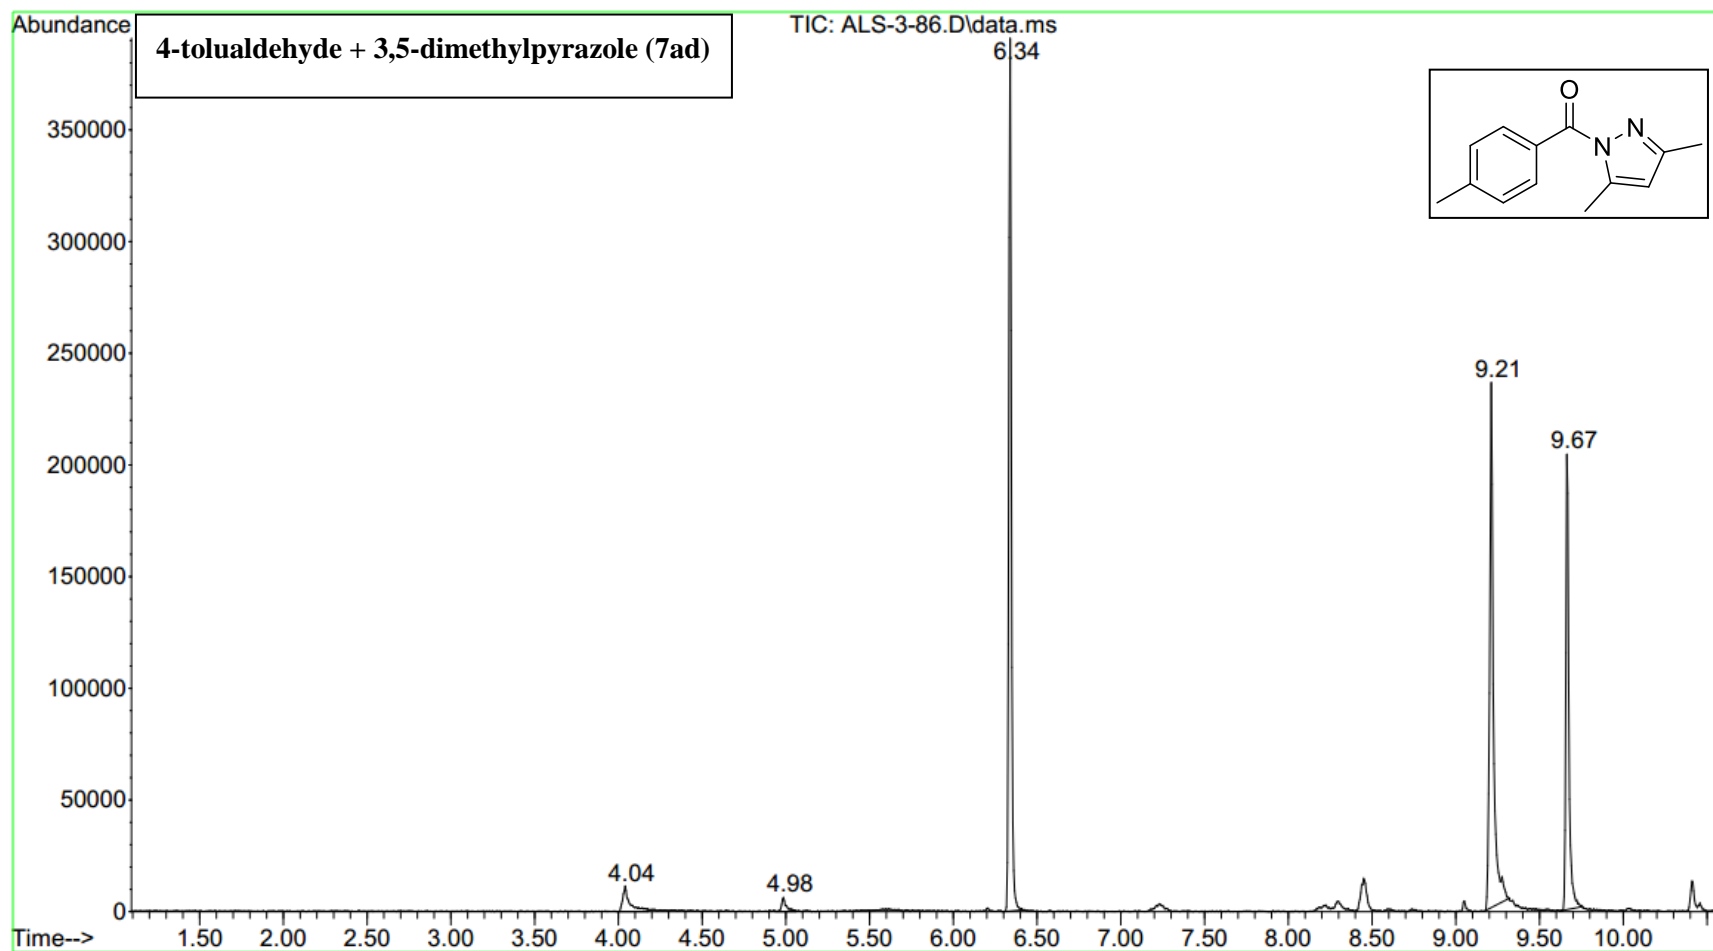

| No. | Peak MW | Ret. time (min) | Area (mAU*min) | Height (mAU) | Identity             | % of total |
|-----|---------|-----------------|----------------|--------------|----------------------|------------|
| 1   | 96      | 4.041           | 335931         | 11538        | 3,5-dimethylpyrazole | 3.118      |
| 2   | 120     | 4.985           | 126524         | 6392         | Starting Material    | 1.174      |
| 3   | 135     | 6.341           | 4146335        | 374204       | Unknown              | 38.485     |
| 4   | 213     | 9.214           | 3621857        | 223561       | ACT                  | 33.617     |
| 5   | 213     | 9.667           | 2543207        | 196597       | Product              | 23.605     |

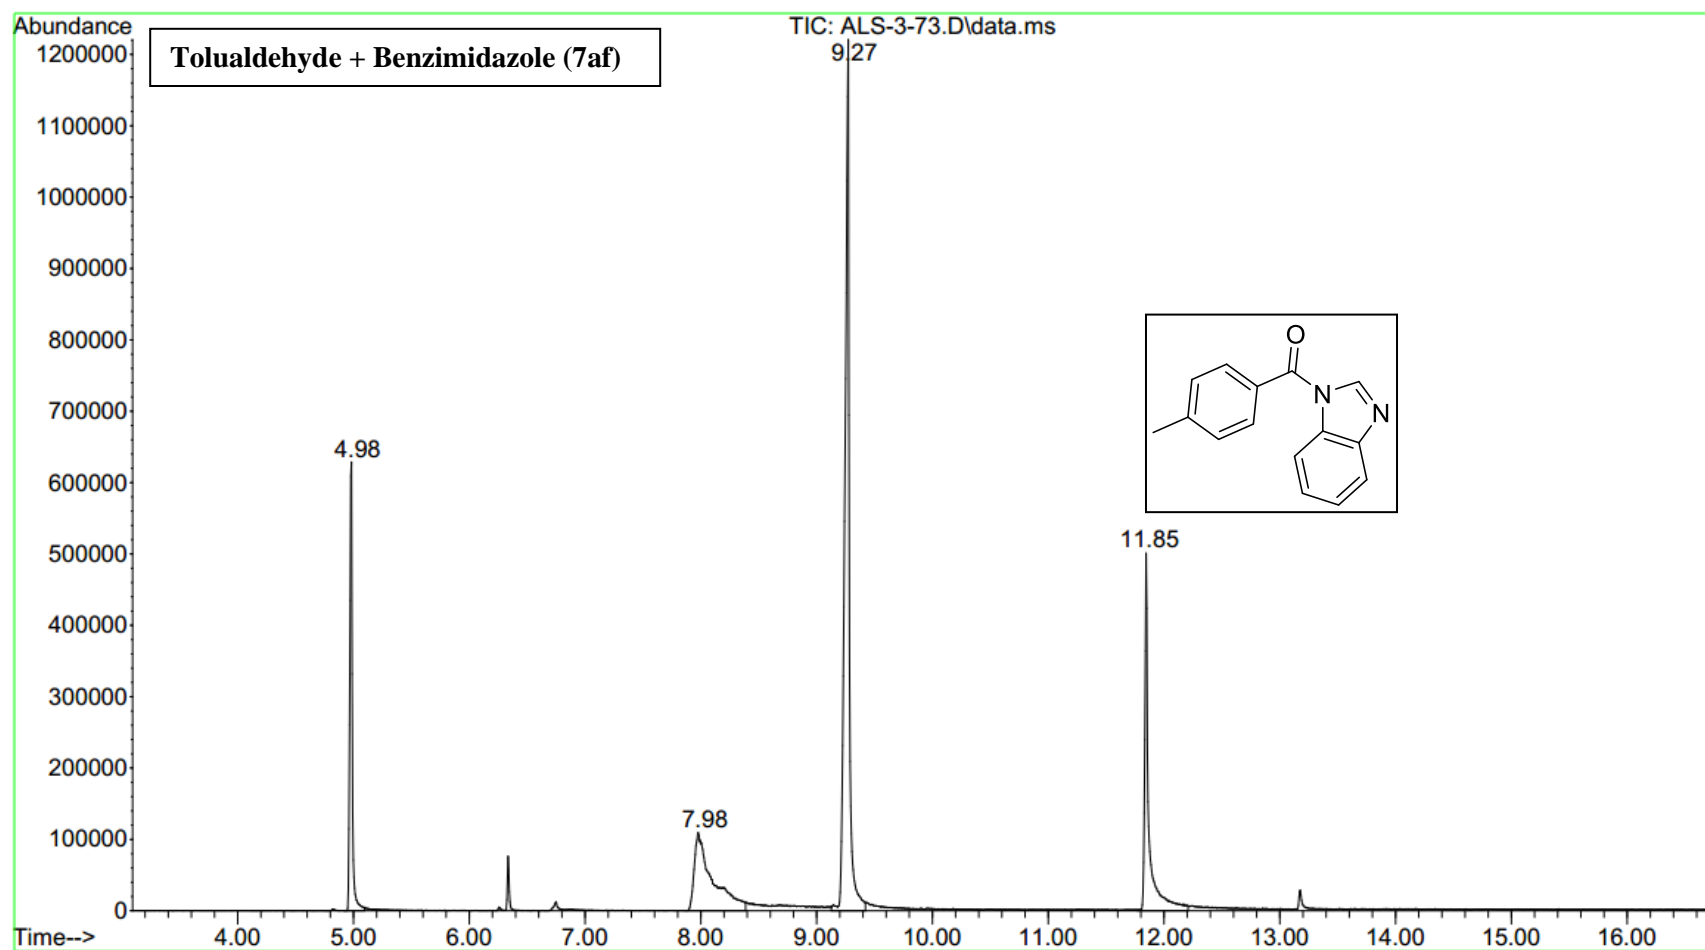

| No. | Peak MW | Ret. time (min) | Area (mAU*min) | Height (mAU) | Identity          | % of total |
|-----|---------|-----------------|----------------|--------------|-------------------|------------|
| 1   | 121     | 4.980           | 9230360        | 659123       | Starting Material | 14.366     |
| 2   | 118     | 7.976           | 11851156       | 110329       | Starting Azole    | 18.445     |
| 3   | 213     | 9.271           | 31439683       | 1261507      | ACT               | 48.933     |
| 4   | 236     | 11.846          | 11729566       | 503408       | Product           | 18.256     |
